# Supplementary material
Source: Frontiers journal article supplement (https://www.frontiersin.org/articles/511476)
Supplement: Table_1.xls [file Table_1.xls]

## Sheet: Supplemental File 4_pancreatiti
File S1. Differential gene expression of pancreatitis tuft cells vs. non-tuft epithelial cells.
	Non-tuft	Non-tuft	Non-Tuft	Non-Tuft	Non-tuft	Tuft	Tuft	Tuft	Tuft	Tuft	fc	p.value	fdr
Smpx	0	0.169316	0	0	0	7.85361	8.0974	7.65787	7.45142	7.59098	207.418	5.68e-12	6.9e-08
Folr1	0	0.169316	0	0	0	7.04036	7.97349	7.96997	8.22624	8.04794	225.618	1.26e-11	7.65e-08
Pate4	0	0.169316	0	0	2.03593	9.37962	8.24265	8.45318	8.70112	8.5234	297.954	2.09e-10	6.61e-07
Fcna	0	0.169316	0	0	0	6.42227	7.16236	8.67478	7.59376	7.55468	174.576	2.17e-10	6.61e-07
Gabra1	0	0.169316	0	0	0	5.75654	5.59643	5.53923	5.03007	6.13374	47.747	6.27e-10	1.52e-06
Ms4a8a	0	0.169316	0	1.80918	0.776449	6.69623	7.65315	8.06848	7.45787	8.0974	131.931	1.14e-09	2.07e-06
Cbs	6.15404	5.71161	5.42386	6.22289	5.27467	0	0	0.445285	0	0.592398	0.0213462	1.19e-09	2.07e-06
Gm17660	0	0.169316	0	0	0	5.74511	7.04979	5.9043	7.49095	5.85289	82.983	1.39e-09	2.12e-06
Bglap	0	0.169316	0	0	0	5.49846	5.65137	7.1394	5.99681	7.40246	79.003	2.58e-09	3.49e-06
Klk1b4	6.14936	6.42676	5.78294	7.06913	6.72183	0	0	1.52185	0	0	0.0143219	2.89e-09	3.5e-06
Tek	0	0.169316	0	0	0	4.56207	5.8	5.56141	6.41901	6.05846	50.0857	3.17e-09	3.5e-06
Bglap2	0	0.169316	0	0	0	5.32316	6.04818	7.29644	5.53674	7.44036	78.5268	5.49e-09	5.56e-06
Siglecf	0	1.60697	0	0	0	5.61983	6.23557	7.12715	6.80227	7.52444	81.0341	6.98e-09	6.53e-06
Pla2g7	0	0.169316	0.334384	0	0	3.94595	4.72555	5.0678	4.82361	4.97988	24.3833	9.25e-09	8.04e-06
Anks4b	0	0.169316	0	0	0.392819	6.51031	4.66689	5.07278	4.96198	6.04987	40.5026	1.21e-08	8.75e-06
1810053B23Rik	6.22289	6.37266	6.2746	6.6295	5.80508	1.65619	0	1.40357	1.10305	0	0.0232217	1.24e-08	8.75e-06
Ccdc129	0	0.169316	0	0	0	4.87667	4.13516	4.14424	4.22751	4.09253	19.1777	1.24e-08	8.75e-06
Bglap3	0.757179	0.169316	0.332886	0.438869	1.90045	6.87427	7.96997	9.19253	6.81861	9.41691	161.425	1.3e-08	8.75e-06
Spc24	4.11589	4.34052	4.49548	4.53087	4.07538	0	0	0.487592	0	0.208915	0.0554632	1.38e-08	8.84e-06
Ptf1a	4.75271	5.16558	4.02984	4.82953	4.89138	0	0	0.526859	0.615377	0	0.0440302	1.66e-08	1.01e-05
A630095E13Rik	5.31427	6.39456	4.88582	4.88646	4.21702	0	0	0	0	0	0.0283674	1.89e-08	1.07e-05
Pstpip1	0	0.169316	0	0	0.760391	4.32178	4.05133	4.87984	4.86458	4.88753	21.3338	1.93e-08	1.07e-05
Gja1	4.97539	5.20639	6.36941	6.02436	4.12984	0	0	0	0	0	0.0246703	2.05e-08	1.08e-05
Crip1	6.58206	7.82678	6.45179	6.55441	6.46036	13.4395	13.6077	11.9588	11.9208	11.9208	55.5	2.3e-08	1.17e-05
Cckar	6.86923	7.80967	7.04594	7.27696	7.5496	2.51606	1.90716	3.14537	3.26314	2.06279	0.0376455	3.01e-08	1.46e-05
Slco4a1	1.59106	0.169316	0	0	1.55029	6.16109	5.5652	5.5918	6.37392	5.67905	37.0674	3.21e-08	1.48e-05
Rcn1	5.3335	5.8984	3.63636	5.29573	5.75449	0	0	0	0	0	0.0275139	3.28e-08	1.48e-05
9630028I04Rik	0	0.169316	0	0	0	3.92438	4.03116	4.49726	3.81988	3.53977	15.2277	3.63e-08	1.58e-05
Mir124a-1hg	0	0.169316	0	0	0	5.16558	4.42246	4.12512	6.35505	5.54486	34.0304	3.87e-08	1.62e-05
Scn7a	0	0.169316	0	0	0.969828	4.81298	4.27844	4.0495	4.22528	4.36476	17.368	4.39e-08	1.78e-05
S100a1	7.69479	8.02486	7.27863	8.0974	7.85361	11.9588	12.3162	11.7506	11.1625	11.7506	15.9761	7.07e-08	2.69e-05
1700016C15Rik	0	0.169316	0	0	2.68854	6.23226	6.91908	6.4383	5.97332	6.29501	55.7162	7.22e-08	2.69e-05
Gp2	8.81755	9.91496	7.39803	8.62252	9.13351	4.04518	3.98125	3.33	3.6213	2.87437	0.027075	7.3e-08	2.69e-05
Erp27	8.67478	9.31739	8.26262	9.13351	8.92481	3.18054	0	3.34468	1.778	0	0.00679187	7.56e-08	2.7e-05
Rbpjl	6.16612	5.71679	6.30983	5.52619	6.13041	1.48239	0	2.13105	0	0	0.0263294	8.24e-08	2.86e-05
Pcdh20	0	0.169316	0	0	0.390801	3.40267	4.35216	4.06698	4.08077	3.46595	13.5637	9.49e-08	3e-05
Mir6969	3.99418	3.9239	4.88267	4.79103	4.35292	0.574182	0.786791	0	0.649409	0.0262634	0.0633018	9.52e-08	3e-05
D330045A20Rik	0	0.169316	0	0	0	4.13516	4.01715	4.5356	6.03377	4.22694	23.5207	9.62e-08	3e-05
Ces1d	6.35106	5.59035	4.09397	5.59394	4.37166	0	0.853041	0	0	0	0.0306156	9.66e-08	3e-05
Amy2a2	5.25557	6.62392	4.24901	5.10986	4.81298	0.493024	0.788387	0.118397	0.581932	0.0225807	0.0356637	9.86e-08	3e-05
Abca2	3.83479	5.22237	4.30268	3.32033	4.15043	0	0	0	0	0	0.0557023	1.19e-07	3.52e-05
Sdpr	5.30761	5.94083	4.45822	5.92348	5.41982	0	0	1.8611	0	0.702836	0.0335578	1.3e-07	3.77e-05
Ccna2	3.91413	3.33438	4.52035	4.20309	4.04815	0	0	0.795138	0	0.0264451	0.0698448	1.35e-07	3.83e-05
Fkbp11	7.01466	7.90873	5.66613	7.26086	6.78532	2.78973	2.42396	1.48589	2.09969	2.31492	0.0383587	1.41e-07	3.89e-05
Srpx2	0	0.169316	0.5998	0	0	4.76852	4.53797	4.08938	3.29063	3.77087	15.3233	1.66e-07	4.48e-05
Chil1	0	0.169316	0	0	0	4.87627	3.62286	3.91832	5.09692	3.43451	17.826	1.72e-07	4.56e-05
Clec4a1	0	0.169316	0	0	0.735626	3.40532	3.84726	5.06503	4.46669	4.85707	17.7197	1.86e-07	4.71e-05
Lect2	0	3.63741	0	0	0	6.84595	8.25624	7.5496	7.09237	8.22624	116.695	1.86e-07	4.71e-05
Dpp4	5.70419	6.74557	6.10708	5.16054	3.39293	0	0	0	0	0	0.0233236	2e-07	4.96e-05
Cldn10	4.50025	6.08191	5.03936	6.16109	5.18541	1.80918	0	0.840725	0	0	0.0343481	2.06e-07	5.01e-05
Lgals1	6.97942	7.13405	6.13826	6.87427	7.11842	3.08955	3.20212	2.48832	3.6686	3.12016	0.0750953	2.17e-07	5.18e-05
Copz2	5.68438	6.11444	5.14387	6.16479	5.29125	1.46849	0.759762	2.32895	0	0.821889	0.0411225	2.29e-07	5.35e-05
Espn	1.36739	2.62777	0.326404	1.44097	2.05884	5.56256	5.733	6.42227	6.75821	6.71576	25.5293	2.42e-07	5.45e-05
Cdc20	4.37166	2.86471	4.4596	4.32951	3.58946	0	0	0	0	0.139478	0.0672141	2.44e-07	5.45e-05
Cdkn3	4.10682	3.80844	4.55383	5.39317	3.16404	0	0	0	0	0	0.0542114	2.47e-07	5.45e-05
Tspan4	4.2176	2.94342	4.30172	4.07494	3.70872	0	0	0.374332	0	0.461696	0.0779085	2.76e-07	6e-05
4930511A08Rik	0	0.169316	0	0	0	3.14936	2.97324	3.26314	3.90446	3.38136	9.8522	2.84e-07	6.04e-05
Il17rb	0	0.169316	0	0	1.98757	4.53613	4.62988	4.53841	4.89746	5.18541	20.0576	3e-07	6.04e-05
Derl3	6.53881	6.51841	6.20126	6.32338	6.14357	1.87672	0	2.00334	0	2.53256	0.0299238	3.01e-07	6.04e-05
Cpne5	0	0.169316	0	0	0	2.77379	3.52119	4.17887	3.6317	3.50763	11.226	3.04e-07	6.04e-05
Sct	0	0.169316	0	0	0.0928097	3.33075	3.75627	2.84619	3.75576	3.18687	10.0056	3.09e-07	6.04e-05
Calml4	4.7212	6.44908	3.25545	4.23962	5.34577	10.2046	10.1675	9.79261	9.39544	10.2046	35.5239	3.11e-07	6.04e-05
Tmem97	7.94374	7.69238	8.28153	8.7225	9.21166	3.53254	4.4702	4.86528	4.64347	4.09614	0.0604198	3.13e-07	6.04e-05
Nupr1	7.63206	9.16664	7.51419	7.60245	8.67478	2.6841	4.25035	2.03105	3.70469	1.9525	0.0273278	3.21e-07	6.08e-05
Rassf6	2.06318	3.82086	2.19899	1.50241	3.2489	7.1717	7.00993	7.83415	6.55736	7.70499	25.7904	3.25e-07	6.08e-05
Pparg	0	0.169316	0	0	0	3.37895	3.27466	2.85979	4.06135	3.28899	10.1182	3.59e-07	6.62e-05
4930539E08Rik	0	1.71421	0	0.774565	0	4.70349	4.8269	4.38025	4.30216	4.21877	15.8736	3.73e-07	6.71e-05
Aldh3a2	3.96314	2.83043	4.25914	3.5034	4.97171	8.16758	7.86413	8.51629	7.56969	8.19916	17.8494	3.75e-07	6.71e-05
Clec14a	0.434704	0.169316	0	0	0.0595232	3.2582	3.07623	3.72621	3.96068	4.54369	11.9613	4.06e-07	7.15e-05
Gfi1b	0	0.169316	0	0	2.6106	4.90918	5.64471	6.18535	5.54073	5.46078	31.8267	4.19e-07	7.21e-05
Dgki	0	2.34215	0	0	0	5.38236	5.38042	6.22007	5.24747	4.57241	29.6943	4.21e-07	7.21e-05
Fgfr1	4.24612	4.13418	3.42045	3.39007	4.03347	0.697467	0	0.646509	0.747151	0	0.0929995	5e-07	8.37e-05
Slc2a5	2.6782	2.93193	3.411	3.35166	3.02177	0	0	0	0	0	0.118346	5.02e-07	8.37e-05
Myo1a	0.604324	0.169316	0	2.06229	0	4.60807	5.1783	4.83499	4.40033	4.39536	17.3423	5.81e-07	9.55e-05
Plac8	7.39385	7.69479	5.00601	4.58122	7.28559	11.7892	11.9588	11.9208	11.7506	11.851	44.0717	5.98e-07	9.63e-05
Ccnb2	2.99647	3.32324	5.23058	4.17037	4.08236	0	0	0	0	0	0.0642302	6.02e-07	9.63e-05
Ncf2	0	0.169316	1.48398	0	0	4.36088	3.52756	4.40245	4.09759	3.77307	13.0109	6.35e-07	0.000100265
Snrnp25	4.71128	4.22645	3.17927	3.44139	6.06714	9.6887	9.6277	8.56576	9.23404	8.73664	28.7495	6.6e-07	0.000101575
Chac1	5.81694	5.44102	4.89025	5.10812	2.66995	0	0	0	0	0	0.0362656	6.6e-07	0.000101575
Cox6c	9.07898	9.19253	9.25213	9.15103	8.95066	13.1051	13.1051	12.0417	11.9588	12.2213	10.277	7.12e-07	0.000105913
Cda	4.02699	5.62686	5.3949	4.98685	4.89105	0	0	0.297872	1.94601	1.14576	0.0505059	7.12e-07	0.000105913
Cuzd1	9.91496	10.6816	8.45318	9.2853	10.0197	4.61852	4.28257	3.33526	4.06629	0.644584	0.0128551	7.14e-07	0.000105913
Vil1	4.61114	4.1133	3.70648	4.66755	4.03947	7.30646	7.63206	7.14622	7.45447	7.30146	8.81856	7.41e-07	0.000107937
Amy2a3	5.71679	7.15079	5.12128	5.22808	5.39703	1.31148	1.07372	1.19393	2.29143	0.0277992	0.0428928	7.48e-07	0.000107937
Bmp2	0.635242	0.169316	0	0	0.360074	3.83479	3.64036	3.12441	2.94048	3.35653	8.85435	7.54e-07	0.000107937
Edil3	0	0.169316	0	0	0	2.83358	3.85567	2.94005	2.81713	3.50243	8.91299	7.99e-07	0.000112934
Relb	4.76248	3.55836	4.57109	4.81327	4.30832	0	1.76021	0.479375	0	0	0.0644898	8.4e-07	0.000117342
Wnt5a	0	0.169316	0.216631	0	2.44473	5.27699	4.57876	4.74329	4.77406	5.31922	20.711	8.6e-07	0.000117678
Anpep	4.35146	4.81789	4.48273	5.35312	4.26491	1.83911	1.33116	0.332886	1.05051	0.34027	0.0782788	8.61e-07	0.000117678
Rac2	1.03775	0.169316	0.555191	0	3.99902	6.30066	6.99906	7.59098	6.91714	7.50465	60.1397	8.97e-07	0.000120098
Ppp1r14c	1.00012	0.169316	0	0.841627	0.73102	4.75023	3.27364	3.85757	4.72389	4.93082	13.5368	8.99e-07	0.000120098
Cp	8.25624	8.1339	6.77775	8.40052	7.69479	2.53817	0.976875	0.629299	4.33936	2.64329	0.0202317	9.51e-07	0.000125646
Amy1	7.96997	8.65331	7.01823	8.23087	8.02486	3.18749	2.50542	0.397494	3.76801	0	0.0155411	1.05e-06	0.000137201
Gm4952	0	0.169316	0	0	4.17502	7.47918	6.15693	7.8386	8.0346	7.53013	92.991	1.07e-06	0.000138179
Matk	1.55122	2.26908	0	0	2.49205	5.68438	5.78207	6.06495	5.57092	5.95856	23.4206	1.08e-06	0.000138179
Gcat	5.58068	6.20126	4.48348	5.34002	6.05962	1.84724	1.64164	2.41572	0.748162	1.92355	0.0709157	1.23e-06	0.000155815
Ccdc109b	1.8611	0.169316	0	0	3.76801	6.32726	6.67487	7.68467	6.77775	7.1717	54.4765	1.27e-06	0.000157936
Lama4	2.70394	2.95571	3.72198	4.32852	4.22751	0	0	0	0	0.445909	0.0884895	1.27e-06	0.000157936
Sdcbp2	0	0.169316	2.82197	0.624356	0.340336	4.60239	5.26438	5.45274	5.57308	5.33724	21.929	1.35e-06	0.000166148
1500015L24Rik	0	0.169316	0	0	1.34642	3.46212	4.09882	3.32379	3.37031	4.05905	10.2651	1.41e-06	0.000171054
Bhlha15	5.85213	6.14357	6.37139	7.91317	6.88622	2.35822	3.23117	3.28358	2.3466	3.01244	0.0724487	1.48e-06	0.00017791
Cideb	0	0.169316	2.81575	0	2.4958	5.68216	7.02135	6.00943	6.71315	5.96375	36.2975	1.49e-06	0.00017791
Reg3d	8.71432	9.41691	7.73064	9.79261	9.24005	3.41314	4.53741	1.87942	5.23709	1.96088	0.0210022	1.58e-06	0.000186238
Lrrc36	0	0.169316	0	0	0	2.59425	3.301	2.83763	2.46808	3.07169	7.06488	1.6e-06	0.00018709
Mgst3	5.92466	7.23026	5.34789	5.44914	5.74074	9.73042	10.3948	9.21166	9.2853	9.44643	12.7743	1.67e-06	0.000189755
Cyp17a1	0	0.169316	0	0	0	3.74199	3.36535	2.12755	3.57274	3.43708	9.28614	1.67e-06	0.000189755
Il13ra1	4.74295	4.03947	4.58757	5.2313	5.83825	8.59881	8.02486	9.06786	7.92826	9.23404	12.8425	1.68e-06	0.000189755
Gjb2	2.7701	5.19629	4.67764	3.88141	4.18239	0	0	0	0	1.02774	0.0653342	1.69e-06	0.000189755
Lck	0	0.169316	0	0	0	3.18386	2.58628	3.40497	4.78419	3.79851	11.4534	1.71e-06	0.000190792
Nrg4	0	0.169316	0	0.606082	0	2.40105	4.07426	3.65237	3.27016	3.84578	9.80585	1.8e-06	0.000199035
Spire2	0	0.169316	1.34025	1.76654	2.29644	5.03154	5.00533	4.58757	5.396	5.32043	15.4943	1.88e-06	0.000205893
Tekt5	0	0.169316	0	0	0.473188	2.90136	3.82613	5.99681	5.69893	4.88441	23.1514	1.9e-06	0.000205893
Fbp2	2.38778	0.169316	2.8818	3.7899	2.13686	6.70396	7.22254	7.37059	6.79361	6.65338	25.5577	1.92e-06	0.000206575
Cd24a	9.43073	8.53679	10.3948	8.99244	10.1675	13.2749	13.4395	15.2097	13.1051	15.2097	23.3177	1.97e-06	0.000210066
Hsd17b2	0	0.169316	0	1.73078	0.15217	4.39011	3.22554	3.95163	4.86078	4.29209	13.302	2.05e-06	0.000216424
B4galt5	1.44354	0.169316	0.367653	0.573621	1.46774	4.63837	3.95573	3.96672	4.76128	3.59765	10.4077	2.18e-06	0.000228788
Mn1	0	3.0002	0	0	0	5.72936	5.45996	5.58668	5.03095	4.67764	25.9359	2.23e-06	0.000231411
Smo	2.25682	3.29864	4.00042	2.91919	3.13554	0	0	0.12711	0	0	0.116896	2.34e-06	0.000239656
Pygl	0	0.169316	0.0320778	0	4.79734	7.37886	7.1807	8.07867	7.26086	7.65315	91.1835	2.35e-06	0.000239656
Cox8a	9.2853	9.47879	9.76325	9.37962	8.89132	12.4565	12.2213	11.851	12.0417	12.0417	6.78704	2.39e-06	0.000242643
Gimap1	0	0.169316	0	0	1.96789	3.14306	5.11808	4.812	4.86528	5.009	17.902	2.42e-06	0.000243286
Rab44	0	0.169316	0	0	0	2.93503	2.27022	4.17841	4.10618	3.80008	10.734	2.46e-06	0.000244722
Reep5	9.47879	9.67338	8.66275	9.58711	9.44643	12.6292	12.7278	12.7278	11.5667	12.5335	8.38212	2.67e-06	0.000263699
Aldh2	2.81419	3.60704	3.25367	3.2108	4.8309	6.71084	6.84874	8.5234	7.14622	7.91317	14.7757	2.88e-06	0.000281969
Dcdc2a	6.32568	6.60364	4.59437	5.12943	3.9333	2.07977	0.983719	0	0	0	0.0383512	2.91e-06	0.000283361
Alox5ap	1.60986	3.916	0.784823	0	5.01176	8.17577	8.53679	8.89132	8.53679	8.93954	81.6596	2.95e-06	0.000284244
Ltc4s	4.34268	3.7457	1.34423	0.874636	4.62258	8.47258	9.05178	8.05533	8.23747	8.36433	43.7234	3.1e-06	0.00029658
Pgm2l1	0.914434	1.92222	2.19306	1.85722	2.55735	5.72704	5.83077	4.44681	5.2031	4.96501	10.1661	3.22e-06	0.000305672
Pde2a	3.17855	1.93022	0.972229	0	2.48004	6.78386	6.08455	6.12201	5.74385	5.59643	20.4486	3.34e-06	0.000312674
Pdia2	8.83865	9.60608	8.22225	8.62991	8.83865	5.08734	3.37895	3.25069	5.248	1.28859	0.0276535	3.34e-06	0.000312674
Prr15	0.834191	0.169316	0.31832	2.30304	3.05235	5.97999	6.44013	5.72936	5.00453	5.71452	21.6795	3.5e-06	0.000318757
C1rl	2.23703	2.60062	3.09272	2.85667	2.73274	0	0	0.32249	0	0.0788753	0.162253	3.51e-06	0.000318757
Ano7	0.537518	2.68014	0	2.2005	1.3542	4.98512	5.61554	4.98395	5.91602	5.34789	16.1699	3.52e-06	0.000318757
Prelid2	0	0.169316	0	2.06474	0	4.19684	4.97833	3.62317	3.93271	4.0495	13.0801	3.52e-06	0.000318757
Tspan6	5.9077	5.30904	3.33385	3.52119	5.33864	8.23087	9.56724	9.73042	8.66792	10.5193	25.3001	3.54e-06	0.000318757
Tmem150b	0	0.169316	0.0262634	0	0	4.39374	3.21752	2.43631	4.03155	2.7129	9.98172	3.66e-06	0.000325711
Ccdc160	0	0.169316	0	0	1.20177	3.47191	5.65563	4.14966	3.14736	4.02699	14.0851	3.67e-06	0.000325711
Nrgn	0	2.25228	0	0	0.301484	5.64471	5.78294	3.99836	6.09657	3.8309	23.5874	3.86e-06	0.000338963
Atp2a3	5.1972	5.02635	4.86458	3.40634	5.95856	8.23747	8.40052	8.78592	8.41196	8.20757	11.4564	3.87e-06	0.000338963
Cnih3	0	0.169316	0	0	0	2.26462	2.47278	3.3288	3.03583	2.54825	6.48089	3.98e-06	0.000345423
Ang	4.06135	3.96913	3.78347	4.47261	3.92335	1.32436	1.18068	0.448745	1.05394	1.89905	0.137678	4.21e-06	0.000361477
Wfdc15b	7.25355	7.24945	4.76943	7.02765	5.34961	2.7924	0	0	0	2.14378	0.0246426	4.22e-06	0.000361477
Phgdh	2.20183	2.65875	2.54701	2.7924	3.34562	0	0	0.232102	0	0	0.157924	4.27e-06	0.000362701
Wbp5	8.01032	8.06225	6.99492	7.39803	7.44473	5.03884	5.09126	4.32852	3.76557	4.47309	0.121363	4.35e-06	0.000367453
Calm2	8.81158	8.76717	8.23747	7.68467	8.68316	11.1034	11.9208	12.4565	10.9739	12.7278	10.5536	4.48e-06	0.000374805
Adgrg2	2.70132	0.169316	0.824957	1.1214	2.62526	6.07367	5.40619	5.04955	5.76129	5.04955	15.7753	4.5e-06	0.000374805
Serpini2	6.46036	7.94374	5.12859	6.3035	5.48572	2.20486	0	1.88736	2.56687	0	0.0327454	4.6e-06	0.000380811
Pnliprp1	11.3518	11.9208	12.3162	11.9588	12.7278	6.89679	7.26086	7.41922	9.17521	4.72809	0.0321502	4.76e-06	0.000391186
Fth1	10.6816	10.0835	11.1625	10.5962	10.6402	12.8558	14.4302	14.4302	13.2749	14.4302	9.52334	4.89e-06	0.00039881
Gatm	5.55369	6.23336	3.20605	4.3775	4.16069	0.881334	1.37049	0.204751	0	0	0.0538487	4.95e-06	0.00040136
Ptger3	3.41219	2.12668	3.55421	3.74955	5.02102	0	0	0	0	0	0.0840429	5.02e-06	0.000404257
L1cam	0	0.169316	1.61054	0.735626	0	4.86033	5.14387	3.59502	3.74453	3.33621	12.4054	5.09e-06	0.000407117
Trak1	2.53817	3.58498	3.40434	1.54744	3.36765	6.37857	6.74403	6.30202	5.92876	5.88496	10.2614	5.17e-06	0.000410925
Pxdn	5.16814	5.02276	4.58512	5.16641	5.03384	0	1.64082	2.5789	2.04617	1.05456	0.0864998	5.33e-06	0.000420852
Gmnn	3.18171	4.44531	4.08077	4.2994	4.12025	0	0	1.6748	0	1.33034	0.0931398	5.48e-06	0.000428846
Cracr2b	4.03588	3.52158	4.62005	4.51443	4.07581	1.22608	0	0.46935	0	1.98604	0.0936059	5.52e-06	0.000428846
Tmem45b	0.662719	2.7374	3.88563	3.55308	4.99965	7.20787	8.48395	9.17521	7.97349	8.99244	36.7303	5.54e-06	0.000428846
Pnliprp2	8.92481	9.73042	7.33173	8.61519	8.62991	4.56598	4.79798	2.53391	5.54003	3.15994	0.0433795	5.59e-06	0.000430132
Bcl2l14	2.25442	2.38615	1.94033	1.17773	6.10708	8.10565	8.23087	9.76325	7.79169	9.34872	58.684	5.73e-06	0.000438006
Cabp2	5.69893	5.98566	3.85724	6.38968	5.60228	0	0	1.92748	2.49101	0	0.0405808	5.97e-06	0.000453798
Strip2	0.595731	3.10757	0.0107544	0	1.84672	4.12749	6.50057	6.64825	6.86923	6.49198	32.3422	6.42e-06	0.000484671
Nucb2	7.85989	8.05533	6.86074	8.03914	8.01435	4.45643	5.47488	2.79071	4.17563	3.71737	0.0800537	6.46e-06	0.000484671
Cystm1	5.60228	5.23208	6.13602	4.63293	5.72504	7.96534	8.83865	8.31761	8.03068	8.53679	7.32151	6.54e-06	0.000485636
Capn13	0	0.169316	0	0	0	2.12274	3.24169	3.29622	2.35599	3.8315	7.65162	6.55e-06	0.000485636
Tmem245	3.15112	1.81503	3.5106	4.4846	3.10446	7.32498	6.6848	5.9348	7.0728	6.98748	12.0237	7.08e-06	0.000521331
Itih2	2.49843	2.92409	3.39281	2.33671	2.06587	0	0	0	0	0	0.16003	7.12e-06	0.000521331
Tead2	4.51692	5.05439	4.1133	4.84175	4.24093	0	1.34025	1.18068	2.4786	1.12772	0.0995794	7.31e-06	0.000526732
Reg3a	8.57411	10.2046	9.31739	11.2135	11.3518	4.00379	4.42125	3.00791	7.25355	2.86325	0.0176729	7.32e-06	0.000526732
Eps8l3	1.90145	1.46585	0.488941	4.19316	0.276257	5.78981	6.03989	7.06103	6.28474	6.72489	26.2626	7.32e-06	0.000526732
Pik3r5	2.46602	2.92374	0.30248	0	2.1788	5.54073	6.05197	5.5474	5.62138	5.45674	16.7889	7.58e-06	0.00054193
Adh1	7.16236	7.82106	3.47191	5.33061	8.51629	11.0336	12.8558	13.6077	12.2213	13.6077	73.7602	7.64e-06	0.000543043
Mfge8	3.88141	4.61114	5.71161	5.30425	5.27195	1.36649	2.23489	1.36649	0.924341	2.40223	0.10173	7.7e-06	0.000544083
Krt18	8.77482	8.33163	9.67338	9.17521	10.2791	11.7506	12.5335	13.8338	12.7278	13.8338	12.8979	8.21e-06	0.000576972
Pde9a	0	0.169316	0.0821036	1.553	1.56803	4.84849	5.69437	5.6582	2.85979	5.2444	18.2087	8.28e-06	0.000576972
Fam174b	4.47156	5.61411	5.75449	5.48126	5.78798	2.17231	1.54378	2.19697	0	2.71153	0.0771087	8.3e-06	0.000576972
Abhd2	0	0.169316	1.24511	2.32016	0.766982	3.94509	3.84543	5.22958	4.42085	4.55777	11.3092	8.65e-06	0.000597913
Cfi	4.55287	5.6582	7.31319	6.69158	6.03598	1.33397	2.41269	3.13516	1.20038	2.376	0.0643141	8.91e-06	0.000612286
Itpr2	2.21449	3.07623	2.90627	2.83925	3.65563	5.24747	5.84327	5.51596	5.78652	5.45598	6.19655	9.64e-06	0.000658659
Pla2g16	6.78386	7.36638	6.5618	6.64825	6.90703	9.19253	9.17521	9.30111	9.13351	9.26614	5.13454	9.9e-06	0.000672265
Dhx34	4.25864	4.20207	5.57428	5.40757	6.42081	0.903744	1.53192	2.05213	2.14326	0	0.0695183	1.02e-05	0.000691708
Cks1b	5.67192	6.23915	3.76557	5.18438	4.81607	1.47372	1.05286	2.56754	1.90933	1.07771	0.0872205	1.04e-05	0.000697232
Nebl	0	3.09056	0.56927	0	0.455232	4.66689	4.39894	4.87667	4.59789	4.88816	14.5475	1.05e-05	0.000702784
Fam149a	4.30268	5.25051	4.61196	5.11208	4.30353	2.60425	0	1.59506	1.22665	0.0410603	0.0811792	1.06e-05	0.00070527
Tg	0	0.169316	0	0	0	2.47531	2.07005	3.16609	2.27623	3.52119	6.35508	1.08e-05	0.000710864
Cox6a1	9.36597	8.92481	8.81755	9.08679	8.71432	12.2213	12.1362	11.2791	11.1034	11.2791	6.15577	1.09e-05	0.000716679
Amy2a4	3.72013	5.02792	2.48832	3.73479	3.17927	0.490232	0.776449	0.111335	0.572079	0.0219922	0.106161	1.11e-05	0.000723153
Plcg2	2.19511	2.74398	0.822995	0.998816	4.2762	6.53579	6.07694	6.3327	6.24887	6.1372	16.6665	1.13e-05	0.000731717
Serpina6	7.4252	8.64789	9.55173	10.6402	9.84836	0	0	4.42425	5.22849	0.398453	0.00674278	1.16e-05	0.000749162
Ptgs2	0	0.169316	0	0	0	2.10372	3.66977	2.06159	3.67061	3.57794	7.90553	1.24e-05	0.000799541
Pnpla3	0	1.9683	0.000516016	0	2.32178	4.63532	5.11418	4.16427	5.08519	4.0292	13.4312	1.26e-05	0.00080475
C4b	5.99924	5.25364	5.10407	6.14798	6.35505	3.68767	2.97548	2.06872	2.8327	1.87111	0.117859	1.27e-05	0.000804835
Cdhr5	0.472767	1.95498	1.9807	4.2287	2.30488	5.65254	5.6582	7.20787	6.59064	6.98184	18.7629	1.27e-05	0.000804835
Fermt2	3.77782	4.93785	3.02434	2.72474	3.20573	0	1.25416	0	0	0	0.102716	1.28e-05	0.00080564
Lcn2	8.68316	7.17587	7.33531	9.19253	7.16823	0	0	1.93582	5.44539	1.449	0.0141311	1.3e-05	0.000811683
Atp2c2	4.50268	3.87593	2.25482	4.73208	2.57121	0	0	0.373418	0	0.279264	0.0910746	1.3e-05	0.000811683
Nphs1	4.2455	3.68001	1.79488	2.64203	3.12102	0	0	0	0	0	0.116897	1.38e-05	0.000853694
Nudt4	6.79081	7.88269	5.68322	6.77566	6.17102	4.05038	2.26649	2.4961	4.05381	2.62177	0.0846134	1.39e-05	0.000858105
Pou2f3	3.13451	3.07078	0	0	0.915927	6.13602	5.94598	5.59284	5.6582	5.45378	20.1557	1.41e-05	0.000865916
Cav2	3.9239	3.21248	3.43114	3.11461	3.97577	1.76712	0	0.91178	0	0	0.125364	1.42e-05	0.000865916
1110006O24Rik	0	0.169316	0	0.456533	0.300966	2.5783	3.16354	2.46983	3.75284	2.18078	6.24929	1.44e-05	0.000877318
Rasl11b	0	0.169316	0	0	0.363307	2.45443	2.02493	3.09807	4.11781	3.73563	7.88795	1.45e-05	0.00087788
Eppk1	3.37345	2.26093	0.259782	1.82449	2.97667	5.94598	5.81535	5.56888	6.15104	5.35975	12.3731	1.46e-05	0.000880409
Skap2	2.83499	3.14167	2.55425	1.80816	5.03642	6.35304	6.19283	7.21975	6.91277	7.43423	13.4304	1.5e-05	0.000897303
Selm	4.97171	5.5652	3.21331	4.64279	4.57468	7.60245	7.68821	7.20326	7.88877	7.55983	7.97214	1.52e-05	0.000908255
Rab34	3.76151	2.8265	2.91763	4.24851	2.59685	0	0	0.444598	0	1.18623	0.129944	1.55e-05	0.000921446
Fbxl21	0	0.169316	1.97817	0	0	4.08987	3.88563	2.99824	3.16756	3.64088	8.73579	1.57e-05	0.000925955
Acot7	3.79695	4.43816	2.80409	1.36136	2.87534	5.72417	6.87692	7.85361	7.02484	7.22567	14.7829	1.58e-05	0.000925955
Lrmp	5.09226	4.83172	4.00379	4.34139	6.22902	7.55983	8.30776	8.8699	7.44755	8.59881	9.56079	1.58e-05	0.000925955
St3gal2	0	0.169316	2.13146	1.81017	1.17488	4.36903	4.58567	3.83027	4.48093	3.88736	9.02226	1.6e-05	0.000928276
Il25	0	0.169316	0	0	2.75115	4.79798	3.25677	4.9257	6.20423	5.2977	19.8681	1.6e-05	0.000928276
Ckb	3.85171	3.85901	4.59291	5.29355	5.40757	1.81017	0	1.4149	0	2.0141	0.0851933	1.66e-05	0.000953345
Plcb2	0	2.06814	0.0952659	0	1.36027	4.22213	4.13103	3.77307	3.75369	3.40674	8.89255	1.66e-05	0.000953345
Mt1	10.0197	10.3948	10.2415	10.0197	9.50693	7.70499	7.12715	4.80128	6.12622	4.36651	0.0620125	1.71e-05	0.000972478
Edem1	4.84003	5.49366	3.73383	5.19122	4.7789	2.40907	1.61455	2.5337	1.32139	1.79753	0.136571	1.71e-05	0.000972478
Cpm	4.13715	0.169316	2.28114	4.07771	3.14065	7.50861	6.54748	7.27367	7.04036	7.53539	21.4055	1.73e-05	0.000979302
Jakmip2	0	0.169316	0	0	0.277615	1.82004	2.25983	2.55545	2.65839	2.45443	4.79072	1.74e-05	0.000979302
Hpgds	2.68112	4.12749	0	3.13229	4.91332	8.01435	7.30646	8.7093	7.40815	8.4415	32.1136	1.75e-05	0.000979302
Prdx4	6.93631	7.38634	6.22747	6.72897	6.22289	0	4.00297	3.31381	2.44058	2.60876	0.0533943	1.76e-05	0.000980202
Inpp5j	0	0.169316	0	1.3542	3.49411	4.64279	4.67531	5.9428	5.50444	5.51222	19.0536	1.78e-05	0.00098578
Arhgdig	6.70396	7.12192	4.41777	5.4979	4.7475	1.72466	2.25942	1.56772	2.6149	0.244897	0.0618325	1.8e-05	0.000997567
Tm4sf5	1.39983	1.65287	0	2.82115	0	4.74092	4.82638	4.51011	5.14387	4.31292	11.568	1.82e-05	0.00100305
Adk	4.4048	4.42313	3.74136	4.25578	4.25035	0	2.13856	1.66397	1.662	0.370649	0.120906	1.84e-05	0.00100574
Lamp2	5.82357	6.07136	6.23674	5.98923	5.75057	4.05084	3.27227	3.87548	3.53098	3.85724	0.209217	1.85e-05	0.00100574
Slc5a1	3.47454	3.66261	3.16756	5.86566	2.27486	0	0	0	0	0	0.077533	1.86e-05	0.00100574
Slc29a1	2.71482	3.99902	2.17994	3.56082	3.62286	0	0	0.555191	0	1.02544	0.134031	1.87e-05	0.00100574
Ndrg1	4.04268	3.88889	3.55873	4.23312	3.72804	5.9611	5.96257	6.97195	6.51354	6.04594	5.28068	1.89e-05	0.00100574
Avil	2.60938	4.4335	0	0	4.57241	7.52444	7.89369	8.73664	7.7737	7.98627	50.5588	1.89e-05	0.00100574
Sostdc1	4.28098	5.94949	1.92222	3.81786	4.49413	0.530505	0	0.143452	0	0.0308992	0.064616	1.89e-05	0.00100574
Epdr1	1.78907	3.6172	3.62165	3.87068	3.70789	0	0	0	0	1.13431	0.11708	1.91e-05	0.00100574
Camk2b	2.81283	1.98727	1.10176	1.12547	0.851329	4.48736	4.42572	4.51443	4.45096	4.10408	7.06544	1.91e-05	0.00100574
Msh2	1.81702	0.169316	1.94412	0	1.20406	3.59954	4.06629	4.1051	4.88441	4.08878	8.70545	1.91e-05	0.00100574
Scara3	6.54748	5.43591	6.18041	6.98748	5.29573	2.39417	2.50272	1.23496	4.15604	1.45241	0.0747728	1.92e-05	0.00100574
Krtcap2	8.63497	8.82548	7.95512	8.65331	8.3744	6.32197	6.3327	6.07432	5.70052	6.4104	0.200174	1.93e-05	0.00100904
Bfsp1	0	0.169316	0	0	0	3.21331	1.73322	4.94442	3.63383	4.7882	12.3697	2e-05	0.00103742
Yipf1	2.11187	2.90395	3.99186	4.14127	3.98069	6.24887	6.55011	6.44908	6.15404	6.28688	7.52592	2.03e-05	0.00104714
Gabarapl2	4.94274	3.90836	4.01193	4.24294	4.53693	6.17623	6.97195	6.87692	6.65787	7.23026	5.47958	2.03e-05	0.00104714
Cutal	0	3.60087	0	0	3.26893	5.9077	5.93212	6.65338	6.42081	5.99577	28.0125	2.05e-05	0.00105093
Clic5	1.63825	0.169316	0	1.03363	2.50859	5.44914	4.9915	3.92073	5.06906	3.76655	11.8716	2.06e-05	0.00105471
2210016L21Rik	3.56685	2.67225	4.09882	4.02878	4.1943	6.44908	5.70052	6.71084	6.46868	6.55736	6.3427	2.08e-05	0.00105893
Ptpn6	1.84321	4.02652	0.00739293	1.96892	4.61534	6.70703	7.17329	7.99261	6.92129	7.99261	29.1433	2.1e-05	0.00106368
Reg2	11.5288	12.1362	12.4565	13.1051	12.6292	7.16236	8.26262	8.72836	10.2046	6.13602	0.051747	2.12e-05	0.00106714
Ethe1	5.10172	5.98103	3.37345	4.26926	6.72897	8.48395	9.2853	8.77482	8.57411	8.93147	13.1687	2.12e-05	0.00106714
Fxyd1	4.66383	3.52927	1.64001	3.52283	2.84944	0	0	0	0	0	0.105764	2.14e-05	0.00106979
Hcn1	0	0.169316	0	0	0.150527	3.73248	2.31991	2.71482	2.46983	1.93663	5.94126	2.17e-05	0.00107832
Fam221a	0	0.169316	1.80221	0	3.41632	4.70689	5.51796	5.78798	4.60084	5.62613	18.0058	2.17e-05	0.00107832
Pm20d2	4.16143	2.523	2.56145	2.58781	1.99133	0	0	0	0	0	0.147113	2.18e-05	0.00107844
Oas1a	0	0.169316	0.526859	0	2.89765	4.11781	3.85675	4.26449	5.83335	5.3949	15.7218	2.19e-05	0.00107924
Dusp14	0	2.14569	0	1.50638	3.36104	4.91717	4.7654	5.6319	5.88353	6.12622	16.7052	2.26e-05	0.00110901
Cpne8	5.48913	4.25066	4.20908	5.23709	4.5218	1.01114	2.05606	2.45208	0	1.81746	0.103363	2.27e-05	0.00111099
Klk1	10.5193	10.8708	10.5193	10.9739	10.7472	7.0882	6.95055	4.48736	8.45318	4.53741	0.0466245	2.3e-05	0.00111696
Cpa2	11.0336	11.3518	10.2791	11.0336	11.2791	6.34486	7.50861	5.77681	8.46482	3.72147	0.0403265	2.31e-05	0.00111974
Cd300lf	0	1.94527	0	0	5.00266	6.40461	6.19659	7.61567	6.73768	7.42944	44.8555	2.33e-05	0.00111974
Map2	3.6317	2.81477	0.303049	0	0.445285	6.23915	5.88496	5.87381	5.60795	5.224	20.0706	2.33e-05	0.00111974
Adap1	0	0.169316	0.276053	0	0	3.06389	2.55334	2.35956	3.18054	1.6635	5.56003	2.34e-05	0.00111974
Malat1	12.1362	11.6618	13.2749	11.3518	11.6618	15.2097	15.6516	15.6516	13.8338	15.6516	9.07805	2.37e-05	0.00112684
Rnf128	3.09491	3.10285	3.32463	3.56628	2.64142	5.82901	5.47429	5.08917	5.30209	5.36253	4.80787	2.37e-05	0.00112684
Cenpm	1.95415	4.67966	2.46239	4.59819	3.39334	0	0	0	0	0	0.093587	2.4e-05	0.00113656
Slc38a3	4.26305	5.96746	4.08137	4.22087	4.17887	0.753349	2.80792	0	0	0	0.0703127	2.43e-05	0.00114221
Dio1	0	0.169316	0	0	0.321713	1.36209	3.94595	3.93566	3.48847	3.79105	9.23069	2.43e-05	0.00114221
Rgs5	4.52904	2.52134	5.20639	5.75566	2.52195	0.635242	0	0	0	0	0.06338	2.47e-05	0.00115366
2210011C24Rik	2.01684	0.169316	0	0	3.22186	4.36833	5.05495	5.24135	5.01377	5.55751	15.6228	2.49e-05	0.00116052
Ambp	8.1339	7.15736	7.37886	7.9827	7.1196	3.88082	2.79728	0	4.76882	0.453575	0.027692	2.53e-05	0.00117393
Ifrd1	7.44036	7.74335	5.4762	5.74385	5.99577	3.03828	2.73137	3.49994	3.95058	2.8966	0.104636	2.57e-05	0.00118731
Bst1	0	0.169316	3.91669	0	0.867129	6.293	4.73793	4.63837	6.02033	6.30066	24.3767	2.63e-05	0.00120967
Bche	4.87936	3.72318	4.76128	2.82351	2.92916	0	1.25911	0	1.24733	0	0.0999943	2.64e-05	0.00120967
Fetub	3.62556	3.95433	3.48818	2.27022	3.37845	1.73854	0	0	0	0	0.125378	2.72e-05	0.00124291
Ggh	5.76719	7.53539	7.10317	7.11592	5.98566	4.18835	3.24996	3.35166	3.93823	4.41687	0.136554	2.75e-05	0.00125185
Foxred2	3.06971	4.75271	2.91451	4.01892	3.84026	0	2.08529	0	0	0	0.101379	2.85e-05	0.00129275
Trpm5	2.49026	4.31652	0	0	4.3101	7.1775	7.39803	7.82106	7.62287	7.04979	36.5164	2.87e-05	0.00129523
Nfib	7.09973	7.44473	5.88029	7.15736	5.64169	4.03155	4.18494	3.73295	2.36057	3.18171	0.112936	2.89e-05	0.00129953
Crlf1	3.68653	5.6305	2.30584	2.57787	3.28726	0	0	0	0	0	0.0885354	2.95e-05	0.00132215
Ank2	0	0.169316	0	0	0	3.7899	1.37911	2.83546	2.96183	3.12491	6.8894	2.97e-05	0.00132901
Fam49a	2.05719	0.169316	0.375528	0	0.0782595	5.50444	2.65033	4.46928	3.58044	4.54597	12.2443	3.01e-05	0.00134182
Amy2b	11.6618	11.7892	11.9588	11.7506	11.5288	8.00367	8.49276	6.742	8.79948	4.31915	0.045235	3.04e-05	0.00134735
2810468N07Rik	0.852313	4.09549	0.26153	0	2.60551	5.22311	5.43523	6.65124	6.75014	6.73562	24.186	3.05e-05	0.0013483
Cables2	1.5702	3.12441	2.65068	1.69474	2.68812	5.31846	5.32253	4.58512	5.18227	4.49247	6.20977	3.07e-05	0.00134999
A3galt2	0	0.169316	0	0	1.43464	4.42572	5.0581	3.1196	2.3185	3.51243	10.3108	3.08e-05	0.00134999
Entpd2	2.21219	3.24344	2.87263	3.80189	3.31835	0	0	1.43696	0	0.361173	0.150718	3.09e-05	0.00134999
Cyp51	0.626204	1.94567	1.67337	1.9744	2.47569	4.77599	4.57936	4.55383	3.71308	4.28458	6.24327	3.12e-05	0.00135485
1810011O10Rik	5.68285	4.59733	5.84256	5.26208	5.37394	1.45602	0	3.3557	2.6392	0.903744	0.0779763	3.12e-05	0.00135485
Ppp1r3b	0	0.169316	3.24606	1.49168	1.37113	5.02847	4.67764	5.16814	4.47156	4.53906	11.4823	3.13e-05	0.00135485
1110007C09Rik	3.69243	5.92158	5.45598	3.31567	4.76672	7.64395	7.80406	7.92456	7.70499	7.78149	8.8234	3.14e-05	0.00135485
Hhex	3.3043	3.56559	3.50406	3.8032	2.92147	1.88174	0	0.241546	1.13129	0.151827	0.149846	3.16e-05	0.00135859
Kif21b	1.81017	0.169316	0	0	1.9696	4.13418	4.2981	3.50295	4.70349	3.32415	9.20718	3.18e-05	0.00136029
Cyp2d10	0	0.169316	0	0	1.68773	3.61129	2.12585	4.44762	4.29028	3.55605	9.41401	3.2e-05	0.00136376
Trf	4.70004	5.11971	4.76483	6.78532	6.24217	0.831907	0	0.187283	3.8344	0.672785	0.0468068	3.23e-05	0.00137443
Tmem86a	1.19025	0.169316	0.791593	2.33781	3.10757	4.34052	4.67864	5.96912	5.13799	4.98685	11.3397	3.27e-05	0.00138602
Prps2	4.05905	6.78021	5.28447	5.40428	5.51134	2.84317	2.04305	0.449612	2.56108	1.47764	0.0863919	3.32e-05	0.00140006
Lman1	5.16181	5.80782	5.69725	5.36148	5.23376	3.44	2.94742	3.68587	3.0148	3.31085	0.221805	3.33e-05	0.00140072
Cdhr2	1.43464	4.34956	0	3.78665	0.502136	6.96934	7.23026	6.53394	7.05376	6.08558	27.0954	3.36e-05	0.00140702
Lrrn1	2.01129	0.169316	0.174319	0	0.818004	4.76066	2.69674	5.41302	3.44139	4.56547	11.6388	3.49e-05	0.00145675
Serpinh1	3.24344	3.23491	2.29896	2.3335	3.19657	1.14095	0	0.169316	0	0.638723	0.180281	3.59e-05	0.00148956
Rhou	5.19122	6.65996	5.15157	6.86074	5.19423	2.60876	1.58386	0	3.5478	0.330881	0.0545119	3.59e-05	0.00148956
BC021891	2.79141	4.16427	3.24129	4.34359	2.9255	1.93167	0	0	0	0.0899083	0.11753	3.61e-05	0.00149361
Nup205	2.48063	2.18697	0.144898	1.12294	0.671605	4.02122	3.98689	4.21629	4.46624	4.79042	7.86149	3.66e-05	0.00150256
Cwh43	3.04228	1.84146	0	0	3.17983	5.25412	5.29291	5.63656	5.55636	5.86123	15.0066	3.66e-05	0.00150256
Cib1	6.15793	6.05962	6.14217	6.46036	6.44795	9.06786	8.93954	8.16758	7.83072	8.72836	4.90144	3.69e-05	0.00150902
Rpap1	3.6062	4.22751	3.35455	3.67951	3.71266	1.64708	1.764	1.82556	0.955127	1.40567	0.218152	3.83e-05	0.00156107
Ddit4l	4.71532	2.99858	3.1722	1.75965	2.60115	0	0	0	0	0.185172	0.123935	3.89e-05	0.00158053
Prickle2	0	0.169316	0	0	0	5.15157	3.95784	3.47712	1.40938	3.44631	10.9631	4.1e-05	0.00166176
Wdr72	3.62432	5.05948	3.62837	4.27882	3.79381	2.49026	0	0.311137	0	1.35973	0.105496	4.32e-05	0.00174587
AA467197	0	0.169316	0	2.92916	0	5.46781	5.46483	3.73937	3.64495	4.01038	14.3778	4.43e-05	0.00178214
Blnk	3.98125	5.8909	6.96551	4.4425	5.94598	8.24265	8.7225	9.08679	8.56576	8.8699	9.52878	4.53e-05	0.00181994
Mycl	0	0.169316	0.167172	0	0.0666076	2.7565	1.3518	2.92916	2.44162	3.34515	5.59535	4.56e-05	0.00182314
Fabp5	7.71792	7.46502	5.39317	6.04594	6.26333	4.79844	0	1.13793	0	1.96669	0.0313267	4.63e-05	0.00184734
Serpina12	0	0.169316	0	0	0	1.44549	2.931	3.45488	2.09584	2.85575	5.74668	4.7e-05	0.00186725
Pirt	0	0.169316	0.12991	0	1.55122	3.56369	1.92052	3.63636	3.1546	3.53423	6.92488	4.73e-05	0.00187411
Sh2d7	4.46165	3.93639	0	0.682284	4.92335	7.96997	7.94374	8.41196	7.5996	7.8386	35.5564	4.84e-05	0.00191021
Gc	2.93503	2.09969	4.90982	3.78196	4.4638	0	0	0	1.47548	0.118397	0.100183	4.86e-05	0.00191437
Inpp5b	1.78946	4.05446	2.64108	2.21914	4.48736	5.5843	6.03252	7.15331	6.28103	6.77248	10.0312	5.17e-05	0.0020265
Cdca3	2.05606	4.85099	5.26633	3.70648	4.76882	0	1.96259	0	0	0	0.0749869	5.21e-05	0.00203606
Ccnd1	5.62613	4.38092	3.38515	6.293	3.91232	0.865649	1.00678	0.621534	2.5114	1.20456	0.0897763	5.25e-05	0.00204582
Hsf2	1.95328	2.15638	0.913028	2.91549	2.44444	4.40299	4.91941	4.72929	4.28663	4.48093	5.60739	5.27e-05	0.00204582
Lima1	5.73209	5.80844	5.12943	5.54974	5.95568	8.02486	7.93712	7.54314	7.71201	7.34232	4.21875	5.31e-05	0.00205683
Alox5	2.96985	3.53694	0	0	5.22621	7.20326	6.74557	8.95066	7.47061	8.45318	42.7561	5.37e-05	0.00207396
Ptpn18	1.98604	4.30404	2.85066	2.29853	4.95501	6.53193	6.26001	6.70107	6.38748	7.27696	10.2151	5.42e-05	0.00208137
Met	4.95332	3.91796	5.50383	4.40984	3.98329	1.5848	0	2.30153	2.28348	1.48036	0.122971	5.44e-05	0.00208137
Qsox2	2.88676	4.91221	2.38068	3.23444	2.38694	0	0	0	0	0.929504	0.127246	5.46e-05	0.00208137
Sri	6.8221	7.04594	6.97942	6.47611	7.15736	8.36932	9.55173	10.0835	8.90025	10.1675	5.72891	5.46e-05	0.00208137
Il7	0	0.169316	0.0410603	0	0	1.976	3.09491	2.24979	1.54881	3.06155	5.07756	5.48e-05	0.00208137
Tc2n	4.33036	4.57047	4.62776	5.28659	4.55035	3.49994	1.67545	1.42445	0.755255	0.886709	0.122874	5.59e-05	0.0021192
Tspan8	4.66606	4.80582	7.1394	6.46468	6.68076	8.58671	9.16664	8.93147	9.10466	9.08679	8.13369	5.64e-05	0.00212009
Srm	6.82831	7.04979	6.08972	7.16823	7.35325	4.60729	4.60807	4.79042	5.07374	4.57327	0.222626	5.65e-05	0.00212009
Pabpc4	5.13161	4.892	4.3327	5.15433	4.49824	2.07079	1.36209	2.16508	3.49696	1.22253	0.149862	5.65e-05	0.00212009
Pea15a	2.72823	3.67556	3.37471	3.0882	4.76308	5.70285	6.07837	6.2093	6.12074	5.94598	5.60026	5.67e-05	0.00212009
Naip5	0	0.169316	1.38353	0	0	3.78147	3.17132	2.11136	3.21041	2.41269	6.17689	5.71e-05	0.00212009
Ahcy	4.7341	4.49824	3.96565	4.56917	4.49548	2.96232	2.41541	2.26551	1.65419	1.71679	0.21027	5.71e-05	0.00212009
Rab4a	3.16444	3.11557	2.68514	3.36765	2.46888	4.77845	5.08982	5.55215	4.72283	5.60363	4.56002	5.72e-05	0.00212009
Ccnd2	5.01176	4.01838	3.8032	3.16884	4.34139	1.83459	1.28547	0	2.04194	0.311137	0.127266	5.76e-05	0.00212466
Adamts1	5.40619	4.16242	4.12137	5.25051	2.48676	2.28003	0.893157	0	0	0	0.0796151	5.77e-05	0.00212466
Rnase4	8.5234	8.70112	9.03699	8.31761	8.93147	7.02484	6.54225	5.15046	5.05254	6.42081	0.157788	5.83e-05	0.00214261
Pxdc1	0	1.69256	1.44616	0	2.35364	3.84415	4.28663	3.8063	3.86931	4.07006	7.34529	5.87e-05	0.00215158
Slc41a3	0	0.169316	0.0432982	0	0.403664	1.27656	3.13369	2.68854	2.71201	2.75603	5.24197	5.91e-05	0.00215445
Sdc4	6.69158	7.41561	7.85361	7.44755	7.23661	9.17521	9.52942	10.2791	9.22253	9.64514	4.72822	5.93e-05	0.00215445
Cyp27a1	0	0.169316	0.0345732	0	0	3.70365	1.15088	3.63879	3.17855	2.6876	7.11624	5.94e-05	0.00215445
Hmx2	0	4.14059	0	0	0.647193	4.78904	5.21796	5.46646	5.21431	4.85099	17.7555	5.95e-05	0.00215445
Dcp1b	1.15385	0.169316	1.17488	1.12413	0	2.89453	3.25481	3.42559	2.47693	3.27048	5.06314	6.08e-05	0.00219277
Tnfrsf19	3.81919	3.41993	3.44252	3.09936	0.981345	0	0	0	0	0	0.129187	6.1e-05	0.00219277
Inpp5d	1.00998	3.89898	0	0	2.68552	5.81535	5.66344	5.11725	5.83511	5.25207	16.198	6.11e-05	0.00219277
Cel	11.5667	11.9588	10.5962	11.1625	11.7506	6.80464	7.50465	6.67227	8.03914	2.24026	0.0280716	6.14e-05	0.00219742
Ostf1	3.72198	3.50851	4.40201	4.15604	4.9289	5.98819	6.6454	6.99164	6.33055	6.31184	4.95895	6.17e-05	0.00219849
Gimap6	0	0.169316	0	0	4.06698	4.60191	4.68909	5.88029	5.49077	4.79734	18.9565	6.26e-05	0.00222697
Pklr	0	0.169316	1.67175	1.25783	0.503319	3.24169	3.76207	4.93858	2.56827	3.77697	7.65855	6.32e-05	0.00223865
Unc5b	0	0.169316	1.3225	0.616062	0.109312	3.11186	4.26138	2.47612	4.62053	2.49742	7.72763	6.33e-05	0.00223865
Mvk	0	0.169316	0.0179153	0	0.515389	2.75272	1.27612	3.32182	2.81371	2.87307	5.52879	6.37e-05	0.00224438
Snx9	1.23341	0.169316	0.897895	0.672785	0.456533	2.9874	2.58484	3.35455	2.40791	2.86406	4.44987	6.43e-05	0.00225984
Igfbp7	4.55554	5.09944	5.17767	2.32724	5.181	0	0	0	0	2.69838	0.0656754	6.47e-05	0.00226087
Csrp2	4.14584	3.74955	4.91221	5.77914	5.53923	2.3648	2.25166	0.277383	2.11639	0.201524	0.0958656	6.47e-05	0.00226087
Tmed6	5.36418	6.27376	4.52069	6.13374	4.53404	3.08266	2.80992	2.25228	3.10023	2.54519	0.164114	6.53e-05	0.0022765
Nrp1	2.41711	3.56174	2.27486	3.22603	4.68623	0.488941	0	0.120719	0.537518	1.01168	0.143446	6.76e-05	0.00234978
Gstm3	3.08659	3.0748	3.38674	4.62373	2.86132	1.20717	0	1.67823	0	0	0.140676	6.79e-05	0.00235061
Spats2	0	0.169316	0	0	0	1.83506	3.27509	2.40223	3.57734	1.63022	5.6967	7.19e-05	0.00248372
Pah	6.06187	5.23376	5.58299	5.37394	4.56917	2.57601	0	0.35835	3.73349	0	0.0611809	7.21e-05	0.00248372
Gamt	6.42676	7.08155	5.86337	6.71084	6.40793	3.1114	4.51377	4.39823	4.68098	3.43819	0.180544	7.25e-05	0.00248372
Spib	1.95069	4.70511	0.00781518	0	4.40539	7.26086	7.4106	7.37886	6.88622	6.80227	30.5682	7.25e-05	0.00248372
BC022687	1.88174	0.169316	0	0	1.98363	4.60316	2.75498	3.73771	5.21903	4.28372	9.93684	7.33e-05	0.00250329
Gm14207	0	0.169316	0.39944	0	0.341358	2.53471	1.38127	3.63524	2.74319	3.34468	5.8393	7.35e-05	0.00250396
Id3	3.75576	4.90601	5.98702	5.24054	4.76398	1.99049	2.04815	1.47917	1.59944	3.33711	0.139681	7.39e-05	0.00250854
Optn	1.83672	3.98158	1.90385	2.41963	2.18495	5.18724	5.42515	6.06395	4.24612	6.02033	7.58532	7.41e-05	0.00250854
Fes	0	0.169316	1.76611	1.72686	3.56082	4.5517	4.75411	5.42971	4.73716	5.08618	11.059	7.55e-05	0.00254414
Dram1	2.88847	4.10939	4.76672	4.72492	4.51692	0	2.45595	0.478239	1.78802	0	0.104615	7.55e-05	0.00254414
Vsig2	4.34781	4.6213	7.44036	5.40298	6.33509	8.34017	9.02217	9.60608	8.35412	9.43073	9.99458	7.64e-05	0.00256492
Zfp36l1	5.77914	5.63656	5.95856	6.66464	5.87381	2.97898	4.37166	2.38304	4.11715	2.30785	0.148568	7.67e-05	0.00256492
Lbp	3.5997	2.49101	2.19511	3.93639	2.33006	0	0	0	0	1.26943	0.158596	7.68e-05	0.00256492
Fam83d	2.33006	0.169316	0.0783729	0	1.2318	3.03504	4.33439	3.1722	3.76436	4.12608	7.59212	7.77e-05	0.0025825
Rph3al	5.59284	4.28312	3.34468	5.52769	5.35668	1.62825	0	2.79187	1.62655	1.53989	0.101272	7.77e-05	0.0025825
Faah	1.47764	3.14878	2.27623	2.1713	2.66696	4.3775	4.5287	5.24333	4.28862	4.91093	4.99899	7.9e-05	0.00261297
Rnase1	12.7278	12.7278	11.7892	12.3162	11.9208	9.84836	8.81755	6.83811	8.40052	4.41342	0.0403085	7.91e-05	0.00261297
Igf1	2.85979	4.19269	3.25038	3.57981	4.62622	0	0	0.279264	0	2.51547	0.113217	8.24e-05	0.00271453
Aqp12	5.89465	7.09973	3.13844	5.58913	5.14312	1.12479	2.19511	1.86612	2.37635	0	0.0688433	8.38e-05	0.00275252
Ddr1	3.14936	4.6526	3.57235	4.12025	3.84348	1.93127	1.60986	1.78149	1.85241	1.01656	0.213264	8.5e-05	0.0027874
Gm4737	5.10407	4.15703	4.32601	4.79533	4.93785	3.35617	1.99925	2.56422	1.98022	1.97857	0.204706	8.57e-05	0.00280057
Lbh	7.49561	7.37059	5.88734	6.85191	6.62597	4.69843	3.92507	1.90145	4.18609	4.22377	0.119965	8.6e-05	0.00280443
Lrrc66	0.904839	0.169316	0	0	0.329273	2.9702	1.8481	3.07047	2.30955	2.16811	4.57129	8.68e-05	0.00282299
Gbe1	1.46625	1.96088	0	1.33084	0	2.93743	3.69799	4.07348	3.42373	3.90446	6.30206	8.73e-05	0.00283091
Slc28a3	5.33061	5.85635	3.58978	5.06461	1.0863	0	0	0	0	0.103924	0.0557555	8.8e-05	0.00284473
Cd81	7.7462	7.14622	8.98129	7.89369	8.23087	5.62078	5.43958	4.52996	6.3035	5.40218	0.171889	8.85e-05	0.00285591
Hmx3	1.44006	1.90448	0	0	0.184254	4.31073	2.65929	4.58204	4.43996	2.91814	8.43432	8.92e-05	0.00286243
Heyl	1.12772	2.39302	2.41656	2.20987	3.01142	0	0	0	0	0	0.212905	8.92e-05	0.00286243
Sardh	4.91284	5.27532	1.48175	5.12859	4.29123	1.60526	0	0.374568	0	0.226502	0.0729637	9.09e-05	0.00291025
Rgs13	5.55215	5.61172	0.0176191	0	7.42944	10.0197	10.8245	12.1362	9.91496	12.6292	166.888	9.14e-05	0.00291721
BC021767	0.820125	2.06951	0.623611	2.01091	2.24496	3.23002	4.01431	4.9692	4.20582	5.03154	6.66386	9.18e-05	0.00291721
Ptprc	1.04419	0.169316	0.480091	0	1.92792	3.97478	4.3316	2.74083	2.73843	3.45432	6.6056	9.21e-05	0.00291721
9130409J20Rik	0	0.169316	2.83043	0.816612	0	2.7845	4.1724	4.59437	4.95501	4.03347	10.1589	9.25e-05	0.00291721
Slc25a35	1.13129	0.169316	1.56803	1.20456	1.51389	3.22274	3.26157	3.16672	3.03504	3.43114	4.30503	9.26e-05	0.00291721
Hck	3.40713	5.68438	0	0	6.53093	8.74206	8.86052	10.7472	9.16664	10.7472	92.2976	9.26e-05	0.00291721
Slc25a21	0	0.169316	0	0	0	1.93551	4.58204	2.94155	1.73236	3.18129	7.16361	9.35e-05	0.00293868
Cpa1	12.3162	12.5335	11.851	11.9208	12.2213	9.25213	8.63497	6.3367	9.25213	4.3092	0.0409063	9.38e-05	0.00294064
Ly6g6f	0	5.52879	0	0	4.60084	7.86413	8.41196	7.26661	8.19916	7.30937	55.113	9.43e-05	0.00294916
Mrps11	3.68473	3.31085	3.85171	3.0792	3.7352	5.41242	5.77681	5.20791	5.87381	5.24747	3.92133	9.53e-05	0.0029699
Frmd4b	3.12417	3.61507	3.0409	3.94187	2.74142	2.13582	0.818715	0.230266	0	0	0.158689	9.56e-05	0.0029699
Msmo1	2.71201	1.64164	3.5056	1.72295	1.98727	4.24901	4.64499	6.06952	4.79103	5.98702	7.13256	9.57e-05	0.0029699
Ubl7	1.83245	1.81348	2.02493	2.08183	2.72707	3.35653	4.17979	4.80863	4.51866	4.71532	4.6584	9.79e-05	0.00302923
Serpina11	0	0.169316	0	0	0.225665	2.23577	4.31782	5.30425	1.73191	5.14954	12.7185	9.84e-05	0.00303836
Lgals4	1.72178	4.87578	4.48736	5.62735	4.10365	6.57932	7.75976	8.14758	7.96534	8.49724	12.3519	0.000100626	0.00309774
Klk1b5	5.55636	9.10466	8.92481	9.76325	9.56724	0	0	0	7.09552	0	0.00697225	0.000101738	0.00312409
Timp1	2.01642	2.17749	3.58609	3.147	4.09015	0	0	1.36798	0	0.0569342	0.151938	0.000103097	0.00315783
Rab2b	1.34796	0.169316	0	1.2313	0	2.82197	3.43298	3.49661	2.7219	2.27455	5.27762	0.000103953	0.00315928
Muc13	0.547269	1.58709	0.209699	3.78147	0.56397	4.28963	4.9257	4.93652	4.62258	4.64196	10.1639	0.00010396	0.00315928
Krt8	7.40815	7.85361	8.63497	8.81158	9.6277	10.6816	10.6402	13.2749	11.6618	12.8558	10.2367	0.00010419	0.00315928
Pstpip2	0	1.53118	0.0152826	0	3.46293	3.92639	4.97988	6.81861	4.13948	6.63542	19.6721	0.000104289	0.00315928
Nxpe2	0	0.169316	0	0	0	2.8966	2.02264	1.43924	2.19402	1.82449	4.11684	0.000104443	0.00315928
Tmem54	2.04305	2.45443	2.45727	4.19184	3.54029	5.30425	4.84924	6.09349	5.65254	6.00156	6.24559	0.00010511	0.00317155
Fndc3b	5.09473	5.37135	4.73716	4.28963	4.39087	2.45875	3.52488	0.948005	0.647193	1.0863	0.121268	0.000107648	0.00324009
Gprc5c	6.47881	5.78207	4.4527	5.63955	5.08519	7.9509	7.88269	8.04794	7.55468	7.57984	4.97793	0.000108163	0.00324757
5330417C22Rik	4.90167	5.72062	7.02135	6.41901	5.3335	3.89948	3.29063	2.62177	3.06971	1.21911	0.119984	0.000109103	0.00326307
L2hgdh	4.46928	4.42425	3.36652	2.99051	3.36259	2.25286	0	0.770219	1.18684	1.04484	0.156944	0.000109216	0.00326307
Rgs11	4.93999	6.13225	5.31922	4.91379	5.51086	1.16733	1.14409	3.31985	0.841627	3.79237	0.100818	0.000110045	0.00327409
Prdx1	8.70112	7.80406	9.44643	8.5588	9.16664	6.81076	6.67885	5.67192	6.78532	5.56987	0.1853	0.000110299	0.00327409
Hepacam2	3.04877	4.53841	1.11791	0.956918	4.63467	6.11573	6.77775	7.9509	6.40014	7.40544	16.8031	0.000110393	0.00327409
Jag2	1.253	0.169316	0.30424	0	0	3.04555	3.55213	2.20437	2.42214	2.11	4.9986	0.000112554	0.0033198
Tmem116	0	2.65347	4.11828	3.70236	3.0691	5.81434	6.65787	6.44493	5.95856	6.79663	12.3447	0.000112641	0.0033198
Myb	0	1.67957	0.0388058	1.11166	1.19137	3.98158	2.67634	2.90881	3.34972	3.30959	5.42991	0.000112753	0.0033198
Eif4ebp1	6.35304	6.08648	5.71067	6.53394	6.20274	3.76709	3.89333	3.71496	5.03827	3.90143	0.230948	0.00011358	0.00333606
Nes	2.90277	3.10603	2.31392	2.50208	2.33721	1.59506	0	0.107693	0	0	0.204214	0.000114761	0.00336126
Pknox2	0	0.169316	0	0	0	2.53873	3.38379	1.32599	1.90757	2.3526	4.81613	0.00011499	0.00336126
Spc25	3.64326	2.34607	1.8334	1.39684	3.27679	0	0	0	0	0	0.176866	0.000115762	0.00337569
Ric8b	1.9864	1.79629	0.504394	0.716179	1.19722	3.51684	3.13401	3.38733	3.42122	3.46799	4.42409	0.000116363	0.00338511
Tnfrsf25	0	0.169316	0	0	0	3.34315	3.17717	1.06169	3.73435	2.23648	6.39395	0.000116797	0.00338962
Impdh1	5.06321	5.10986	4.13574	5.35217	5.39102	0	0	3.10893	2.78354	1.91028	0.0915149	0.000117335	0.00339712
Txnip	5.71784	5.36067	6.41371	6.15909	5.95306	4.28921	3.60704	3.97393	3.72804	4.15877	0.255346	0.000118318	0.00341746
Trim35	3.47191	3.04312	3.60087	2.42636	3.17389	1.43025	1.32492	0.377447	1.21139	0.89964	0.234149	0.000119858	0.00345372
Jun	4.91837	6.79663	7.00041	6.98511	6.96551	4.67173	3.05689	3.24744	4.02548	4.02122	0.150866	0.000120638	0.00346798
Gipc2	3.20573	0.169316	0	4.66606	4.64347	7.09552	6.82679	7.93712	7.04594	7.69238	27.5243	0.00012122	0.00347651
Rnasel	3.27539	0.169316	0.50281	2.29254	2.0866	6.97942	3.82943	4.72492	5.91909	5.64169	13.4878	0.000121866	0.00348681
Slc26a2	1.00218	3.24129	1.78618	1.89196	3.65039	5.14588	4.27353	6.08648	5.2313	5.99443	8.179	0.000122328	0.00349181
Nr0b2	1.97181	1.8931	1.46052	3.07674	2.31816	0	0	0.304779	0	0.0239251	0.236789	0.000125	0.00355939
Hebp1	3.37444	3.22851	0.828185	2.02745	3.73563	5.08618	5.79257	5.48572	6.41371	5.37005	7.94915	0.000125281	0.00355939
Dll1	0	0.169316	1.469	1.42695	0	3.35696	2.43388	2.69085	3.83812	3.09988	5.54384	0.000126042	0.00357266
Lurap1l	5.17767	5.62236	4.812	5.65487	4.95332	1.43427	2.79103	3.08659	3.82203	2.73028	0.180341	0.000127269	0.00359905
Dpysl2	6.31974	1.69411	4.10759	4.16702	6.65124	7.99261	8.45318	10.2046	8.83865	10.3948	24.0642	0.000128783	0.00363341
Sec24d	4.05084	4.09358	4.54597	3.82613	4.7705	2.79071	1.59238	2.06229	0	0.158442	0.130612	0.000129874	0.0036509
Ano10	1.97911	0.169316	4.0277	0.824957	2.679	5.48126	5.39783	5.33061	4.92449	5.30904	10.2151	0.000130003	0.0036509
Lrrc59	6.3327	5.86337	5.65563	5.52879	6.17466	4.5356	3.54233	3.05417	4.24851	3.16221	0.217266	0.000131196	0.00367234
Slc7a2	2.75862	3.09334	2.80328	1.45602	1.36839	0	0	0	0	0	0.203637	0.000131371	0.00367234
Golt1a	1.74717	0.169316	2.63035	1.08417	2.53694	4.61114	4.64012	4.0476	3.81373	4.39087	6.35152	0.000132115	0.00367825
Rhoj	4.20547	3.5034	1.92489	4.33936	2.13561	0.584125	0	0	0	1.11166	0.135598	0.000132187	0.00367825
Ttc23	2.69892	3.98473	1.70373	3.68145	3.64186	1.58092	0	0.329378	0	0	0.147616	0.000134008	0.00370716
Ypel2	5.80782	5.43205	3.98739	5.33724	4.50909	7.49561	6.66155	7.71201	7.23414	7.73452	5.10832	0.000134122	0.00370716
Fdps	3.22603	3.1579	2.14159	3.71946	4.22798	5.18319	5.53776	6.21486	5.41242	6.01469	5.19812	0.000134141	0.00370716
Spint2	9.01275	9.44643	10.4327	9.6887	10.0835	11.1625	12.0417	13.4395	12.1362	13.4395	6.54802	0.000134751	0.00371559
Tmem221	1.22484	3.97227	3.65671	1.86663	3.61454	0	0	0	0	0	0.137072	0.000135104	0.00371688
Acsl4	1.63289	2.67361	3.13085	2.00633	3.12701	5.27532	3.91036	4.89977	5.20953	5.07278	5.13163	0.00013592	0.0037309
Oaf	2.58349	3.5392	4.5572	2.11487	4.0697	0	0	0.648089	0	1.71115	0.133875	0.000136975	0.00374419
Hpn	5.99203	6.10576	7.08554	5.71161	6.16612	2.43555	2.58429	4.91941	3.27581	4.06198	0.147952	0.000137181	0.00374419
Mfsd7c	0	0.169316	0	0	1.30978	3.20893	2.94994	2.7104	1.47917	3.17087	5.30755	0.000137328	0.00374419
Pla2g4a	2.46144	0.169316	4.84078	2.33299	4.00244	6.48975	6.39067	7.19654	6.08972	6.76375	14.1693	0.000138116	0.00375594
Dmxl2	2.51057	0.169316	2.41007	1.38881	3.4169	5.24913	4.88816	5.05254	4.78545	4.49975	7.54685	0.000138377	0.00375594
Fyb	4.37213	4.95261	0	0.397494	3.747	7.91739	7.47371	7.30646	7.13405	7.05376	25.6916	0.000138878	0.00376115
Cela1	12.2213	12.3162	11.5288	12.0417	11.2135	10.2791	8.4415	6.76375	8.29948	5.12128	0.0589946	0.000139302	0.00376425
Trim40	0	0.169316	0	0.660101	0	3.07169	2.78049	1.12547	3.79802	2.78683	5.84263	0.000139883	0.00377094
Sdf2l1	6.6129	6.67885	5.79577	6.3327	7.03711	3.30798	4.47734	4.61462	4.10093	4.87748	0.215268	0.000140403	0.00377094
Cadm1	4.13862	4.13516	3.99707	4.97171	4.27882	2.77914	0	1.49168	2.24532	0	0.124909	0.00014048	0.00377094
Tspan9	3.43819	5.81294	5.32625	2.98837	2.25228	1.73955	0	0	0	0	0.0815769	0.000142207	0.0038089
C3	8.47258	8.14098	8.26875	8.74639	10.3562	2.76389	0	1.72295	5.6319	6.38537	0.022156	0.000143796	0.00384069
Pla2g1b	10.6402	10.8245	7.60245	9.25213	8.49276	6.66712	5.3101	3.34011	5.82357	1.83116	0.0367021	0.000144026	0.00384069
Cldn6	5.79181	3.48701	3.80254	4.3373	4.54442	0	2.89625	1.8689	0	0	0.0921682	0.000146219	0.00387589
Ckmt1	4.09425	5.54974	7.02765	5.97185	5.6582	7.97895	7.9509	9.07898	8.17577	9.19253	7.03762	0.000146277	0.00387589
Tceal8	4.63532	4.88582	4.42125	4.53657	4.81716	3.33711	3.03994	2.19899	2.27936	2.69038	0.258805	0.000146379	0.00387589
Ceacam1	3.41047	2.90789	2.47278	3.05816	3.10398	4.99023	4.81607	4.57241	5.3647	4.68571	3.71965	0.000146621	0.00387589
Stk38	3.43775	4.40299	4.0248	3.85789	5.06906	6.80791	6.48688	6.10433	5.88246	6.22007	4.41321	0.000147928	0.00390195
Serpina9	3.61158	0.169316	0	0	2.35599	3.5387	5.37899	5.74511	5.12859	6.17904	15.635	0.000149234	0.00392788
Uqcr10	8.58671	8.63497	7.75446	8.06225	7.7737	11.3518	11.5667	9.97857	9.6887	10.3149	5.34322	0.000150123	0.00394275
Gpa33	0.917421	0.169316	0.942428	2.56233	2.32492	4.95105	4.03395	3.49111	3.94653	4.03116	6.53178	0.000151285	0.00396471
Gfod1	0	0.169316	0.442302	0	0	1.42727	1.89075	1.94746	2.63884	2.26834	3.76385	0.000152721	0.00399374
Gm5088	4.01193	3.89459	2.95811	3.7755	3.05816	1.16594	0.921659	0.845741	2.44697	0.374783	0.190962	0.000154318	0.00402684
Fam65b	0	0.169316	0.936739	1.46014	2.24426	3.53821	3.27415	3.60202	4.59183	3.0002	6.22982	0.00015481	0.00403102
Nol4l	1.20907	1.6635	2.16716	1.98757	0	4.68623	4.50165	2.92996	4.01193	4.06044	6.20135	0.000155211	0.00403265
Cox6b1	9.13351	8.93147	9.17521	9.43073	8.8699	11.9208	11.5288	10.3948	10.8245	11.1034	4.13037	0.000155536	0.00403265
Hpcal1	3.0792	4.51779	3.65016	3.7352	3.40186	1.10427	2.09864	0.624356	1.9889	1.29813	0.209644	0.000155896	0.00403339
Fmo5	1.68362	3.11762	3.16116	2.42542	1.96989	0	0	0.264367	0	0.999566	0.214827	0.000159365	0.0041144
Rps2	7.47061	6.73929	7.79592	7.06103	7.97349	5.02444	4.85818	5.92466	5.29863	5.57578	0.237874	0.000160465	0.00413102
Ech1	6.41371	6.43693	6.55736	7.1775	7.08554	8.14758	8.56576	9.24005	8.5234	9.25213	4.03222	0.000161001	0.00413102
Epb4.1l4a	2.77165	1.81792	2.82963	1.68935	2.84619	0	0	0.532767	0	0.852313	0.231017	0.000161602	0.00413102
Spp1	10.5962	8.72836	11.6618	10.2046	10.4327	7.43423	8.39398	4.59291	5.01176	3.46557	0.0428359	0.000161716	0.00413102
Adamts10	2.28055	3.30673	1.81561	2.71482	1.15307	0	0	0	0	0	0.209619	0.000161723	0.00413102
Bok	5.93891	6.56536	6.56009	6.97942	5.07278	3.06492	0	2.58874	4.46437	0	0.0544205	0.000162047	0.00413102
H2afj	4.80863	5.53108	5.65912	5.60795	5.62907	8.26262	7.96102	6.83535	7.92456	6.97942	4.42423	0.000163028	0.00414434
Stx7	3.52638	4.12137	4.44531	3.58442	4.05718	5.71452	5.36901	6.3968	5.82901	6.53881	4.06343	0.000163252	0.00414434
Fn1	4.19158	3.15344	2.45657	3.36535	5.50934	0	0	0	0	2.26649	0.102809	0.000164146	0.00415
Sycn	10.3948	10.4327	9.08679	10.5193	9.52942	6.90247	5.87785	3.5015	7.7786	2.17994	0.037304	0.000164204	0.00415
Gm11974	4.22293	4.98148	3.8496	3.21596	4.31915	2.29199	1.48488	1.11661	2.44022	0.35914	0.167327	0.000164498	0.00415
Maged1	6.35505	6.47433	6.53579	5.63319	6.02033	2.63721	4.11182	4.39011	4.18835	4.40299	0.209113	0.000164933	0.00415235
Zg16	10.9739	11.0336	7.96534	10.7472	9.55173	7.60938	5.92638	3.55213	6.75341	2.9802	0.0387394	0.000167133	0.00419312
Mapkapk5	1.85384	1.85085	1.24886	1.95996	1.42445	3.60239	3.1114	3.48701	3.72112	3.46891	3.50781	0.000167242	0.00419312
Stard5	3.79172	2.15055	3.58405	0.766982	5.59035	6.23557	6.53193	8.4415	7.28207	7.56969	16.3977	0.000167859	0.00419993
Serpinb6b	3.89788	6.09954	5.86213	3.74478	5.06609	2.29812	0	3.18171	0.899011	0	0.0792022	0.000168323	0.0042029
Egln3	1.38881	0.169316	1.11601	0	2.21272	3.42921	2.81371	3.77957	4.58055	3.42171	6.17987	0.000169795	0.00423096
Mt2	8.79948	9.26614	9.22253	9.44643	7.69898	6.44013	6.10355	0.915927	4.63609	2.95446	0.0391002	0.000171553	0.00425582
Ociad2	4.52776	6.36339	3.86623	4.92829	4.90237	7.84954	7.89637	7.44755	6.93222	6.9555	5.65148	0.000171599	0.00425582
Ildr1	1.05861	1.50406	0.0600107	0.798529	0.983719	3.0945	2.01195	3.74955	3.67951	3.41493	4.95574	0.000171843	0.00425582
Dnajc3	8.04794	8.45318	7.29644	7.242	7.40544	5.71293	5.81125	5.179	4.56671	6.09349	0.215189	0.000173106	0.00427505
Plekhg5	0.985262	0.169316	0.0469463	1.45142	0.105751	3.14736	2.89489	3.27364	1.82979	2.97614	4.83201	0.000173339	0.00427505
Ppfibp2	0.927375	0.169316	1.21443	0	1.96669	4.33036	4.69562	5.83825	1.92011	4.57468	10.6756	0.000173674	0.00427505
Tpx2	3.49994	3.23002	0.619391	3.50057	2.97637	0	0	0	0	0	0.147087	0.000174183	0.00427893
Cdkn2c	2.6127	3.06155	0.682834	1.26288	0.343616	3.84925	3.86262	5.2444	5.38236	4.7789	8.17256	0.000177112	0.00434209
Ifitm3	8.43359	8.51629	8.73664	9.50693	9.23404	0	0	4.4846	6.11294	5.37684	0.0193621	0.000178114	0.00435787
Lmo4	5.18902	5.78535	4.31951	5.27284	4.73266	3.25069	1.89787	0.522048	3.39872	1.78618	0.135018	0.000179147	0.00437436
Padi1	0	0.169316	0.35774	1.18623	0	2.47693	1.5767	2.43342	3.10285	2.92955	4.47297	0.000181978	0.00443072
Arrb1	2.15419	3.2586	0	3.29864	1.10846	5.62976	5.24913	4.63409	5.25461	4.74809	8.81012	0.000182184	0.00443072
Hspa13	4.06378	3.8973	4.35896	3.10868	3.96672	2.43834	1.53002	1.65287	1.71421	2.17824	0.254131	0.000185932	0.00451285
Vav1	1.03632	4.04366	0.0335876	0	4.24406	6.2348	6.27744	6.53193	5.36253	6.07694	18.7031	0.000187163	0.00453367
Pfkp	1.95126	3.51454	1.95858	1.53192	3.47527	3.66704	5.81294	6.8436	5.85342	6.87692	10.0176	0.000187709	0.00453786
Bub3	4.42814	4.93082	4.00819	2.0837	5.21903	6.83811	6.62157	7.27696	6.66464	7.85989	7.55932	0.000189841	0.00458022
Cgnl1	3.27715	2.90079	3.76151	4.10224	2.9202	1.78254	1.14452	0.52863	1.84927	0.475862	0.212243	0.000190215	0.00458022
Spata2l	0	0.169316	0	0	0	1.39515	2.63141	2.9303	1.34601	2.36239	4.28469	0.000192193	0.00461871
Hist1h2aa	0.864108	2.17431	1.10065	1.91798	1.99248	4.59291	4.19659	3.0002	4.31735	3.39963	4.89541	0.000192869	0.00462581
Irf7	0	0.169316	1.22412	0	2.88458	3.66659	3.29541	4.01669	3.35617	4.37971	7.3989	0.00019349	0.00463158
Serp1	9.37962	9.13351	9.6277	9.03699	9.67338	6.83977	6.15605	8.03914	7.19258	7.74848	0.221436	0.000195673	0.00467463
Fgf12	2.81546	2.8242	2.16811	1.63876	1.11337	0	0	0	0	0	0.23133	0.000197879	0.00471773
2810001G20Rik	3.24744	0.169316	1.37785	0	0	4.89332	4.07494	4.01619	3.49499	3.95863	8.74642	0.000198253	0.00471773
Phka1	1.3852	0.169316	0.336929	0	0	2.07395	3.57339	2.12179	3.34515	2.35429	4.97752	0.000200101	0.0047524
Reg3b	10.3149	11.2791	13.1051	12.8558	12.8558	6.45179	7.24945	8.90025	10.5193	6.46661	0.0557581	0.000202067	0.00477435
Stxbp6	4.43763	3.56369	2.51785	2.77136	1.43368	1.06882	0	0	0	0	0.150614	0.000202075	0.00477435
Lamc1	3.4075	5.31922	4.35765	5.66713	6.34486	0	0	3.06667	0	2.71836	0.068761	0.000202421	0.00477435
Ccnj	1.33184	1.82337	0.686966	1.21189	0.9489	2.35013	3.63524	3.62679	3.69396	3.0685	4.2115	0.000202901	0.00477435
Fyn	2.96459	3.95688	1.21327	3.67779	1.79706	0	0	0.220676	0	0	0.156282	0.000202988	0.00477435
Iyd	1.72228	0.169316	0	0	3.70845	3.82553	4.85162	5.33724	4.2994	4.61196	11.0436	0.00020407	0.00479053
Ltf	0	0.169316	0.0152748	0	0	1.31615	1.74331	2.73103	1.67011	2.32291	3.78366	0.000205047	0.00480039
Ctsc	5.86566	5.87381	4.7212	2.49318	6.48491	7.51849	8.79948	11.0336	8.74639	11.5288	21.6696	0.000205499	0.00480039
Fam177a	0	0.169316	0	1.21858	1.12348	2.58249	2.74656	2.68212	2.0155	2.6551	4.0956	0.000205708	0.00480039
Vav3	1.388	0.169316	2.96006	0	1.61385	4.22645	5.46646	4.3316	3.36596	3.87501	8.1503	0.000206069	0.00480039
Gm20219	3.28918	0.169316	1.56055	2.09008	1.5463	4.17774	3.77992	5.05439	4.4302	5.52495	7.27201	0.000207051	0.00481404
Kctd13	1.96723	0.169316	2.52834	0	3.09737	4.66864	4.06029	4.74674	4.98882	4.4846	8.20993	0.000207896	0.00482447
Uba5	5.45054	5.83212	5.13541	5.64471	5.51009	3.37471	3.1263	4.13103	2.93919	4.15604	0.255409	0.000208458	0.00482828
Armcx1	0.674134	0.169316	2.49162	1.17488	2.55307	4.02572	3.46732	4.71017	3.82732	4.22798	6.22942	0.000209336	0.00483768
Gm2663	11.2135	11.5288	11.9208	12.1362	12.4565	8.15894	6.72669	7.38949	10.8708	5.09859	0.0543243	0.000209659	0.00483768
Degs2	7.15736	4.62988	8.66792	8.36932	7.69238	9.88733	11.0336	12.8558	10.4327	13.1051	17.871	0.000214431	0.00493353
Cald1	3.56847	3.71654	3.54861	5.16365	2.84997	1.87066	0	0.288171	2.00841	1.02001	0.150517	0.000214764	0.00493353
Ccdc23	4.58363	4.96575	2.62526	3.66464	3.94371	6.57129	6.46207	5.80271	6.78279	6.08314	5.2191	0.00021503	0.00493353
Acad12	0	0.169316	0.812699	0.779054	0.340706	3.09988	3.15417	1.92879	1.80072	2.47488	4.20274	0.000218153	0.00497767
Snx32	0	0.169316	0	0	0	1.34642	1.38881	2.81371	3.44066	3.17717	5.27617	0.000218162	0.00497767
Bex2	6.75014	2.98872	5.11553	3.78305	4.57876	2.26394	0	2.31084	0	0	0.0754526	0.000218369	0.00497767
Cacnb4	0.558476	2.40053	0.0961181	0.453575	0.333175	3.8309	2.92107	2.82153	3.00909	3.3492	5.34425	0.000218592	0.00497767
Six5	1.90757	3.01142	1.76244	2.4601	2.22987	1.04083	0	0.298213	0	0.0320778	0.249991	0.000220573	0.0050134
Mical1	0.442752	0.169316	0.0993252	0.578549	1.2526	3.1579	2.0471	2.72267	2.38615	2.12805	3.94456	0.000223106	0.00506151
Dclk1	6.83535	8.46482	2.88393	0	7.1394	12.7278	11.7506	11.2135	10.6816	11.6618	93.2069	0.000223953	0.00507127
Capn2	3.54104	5.10172	2.97419	3.93958	4.07006	1.41531	0.770219	0.329596	2.77136	0	0.136975	0.000226571	0.00512102
Gpr137b	2.55889	0.169316	0.569771	0.919759	1.3833	3.07236	3.13844	3.74453	3.67895	3.79928	5.15691	0.000228306	0.00515064
Nt5c	3.96565	2.86998	4.37213	3.86204	4.59627	6.06495	6.80791	5.96746	5.52879	6.04223	4.43537	0.000229122	0.00515949
Kdm4a	0.487592	0.169316	1.72178	2.09657	2.99349	3.9291	3.41776	5.47429	4.75871	4.67864	7.77019	0.000229772	0.00516456
Fnbp1	0	0.169316	0.339744	0	0	1.87013	1.61097	1.87769	1.56381	1.85131	3.1448	0.000231631	0.00519674
P2rx1	3.98158	5.53776	3.53173	5.01322	5.46893	0	1.41531	2.38454	3.16221	0.584706	0.109023	0.000232978	0.00521733
Inhbc	0	1.8315	0	0	0.352181	4.37592	1.36306	3.92335	3.44306	4.26086	8.20508	0.000233413	0.00521746
Mir7076	3.79315	2.08917	3.14736	1.99925	2.41963	0	0.751786	0.130867	1.1559	0	0.205613	0.000236182	0.00526968
Serpinb1a	5.25132	7.17329	6.1946	4.93858	6.51031	8.18565	8.11506	8.40052	8.16314	8.83865	5.01754	0.000239865	0.00534206
Adcy4	0	0.169316	0	0	4.58204	5.6921	4.66383	4.12346	6.06822	4.87186	17.5527	0.000241105	0.00535985
Pard6g	2.8419	2.59463	0	3.00323	0	5.61411	4.7918	4.9289	4.37971	4.91649	9.43648	0.000242082	0.00536365
Vdac3	4.59364	4.78307	3.44383	2.88733	5.11489	5.99122	6.78386	7.18835	6.19283	7.20004	5.68323	0.000242158	0.00536365
Rrbp1	7.72172	8.429	7.22567	7.0728	7.22567	5.59715	6.44493	4.32951	4.37213	4.37166	0.175325	0.000243955	0.00539362
Odc1	5.07799	6.62157	4.9046	5.25803	5.01322	1.98757	0	2.15727	4.04174	2.52523	0.106378	0.000246093	0.00543102
Upk1b	0	0.169316	0	0	2.8891	4.93999	4.1105	4.03347	4.28312	2.13636	9.77436	0.000249737	0.00549223
Amotl1	5.02792	4.82046	4.46563	4.14584	3.98892	2.01642	3.6259	0.394971	0	0	0.102785	0.00024977	0.00549223
Gm5662	4.13066	6.3035	0	0	2.14241	7.53539	7.11095	8.81158	7.01466	7.94374	35.9507	0.000250924	0.00550766
Isg20	4.54825	2.85979	4.06166	2.92107	3.24804	1.48716	1.38715	0.290343	0	1.92969	0.17569	0.000253586	0.00553747
Fgf9	0	0.169316	0.640721	1.50695	2.71984	4.52904	3.51738	3.48538	4.47644	2.95643	6.89509	0.000253916	0.00553747
Gstm2	5.46781	6.03252	6.32338	7.31707	6.51841	3.05031	4.50709	3.64652	4.91486	3.72766	0.194447	0.000254012	0.00553747
Amica1	3.72147	0.169316	4.16472	3.43537	2.03525	6.742	6.85634	5.6798	5.4245	5.96746	10.7689	0.000254104	0.00553747
Prcp	1.44097	0.169316	2.00427	0.503747	2.73217	4.15264	3.90797	3.93393	3.34743	3.92013	5.58797	0.000255988	0.00556695
Psd3	3.75627	2.49742	0.20351	2.71783	1.53249	5.77914	5.53923	4.54202	4.57241	5.18516	7.9013	0.000256647	0.00556695
Syne4	1.00605	2.69495	2.99411	2.43592	3.09766	0.788387	0	0.219456	0	0	0.211076	0.00025683	0.00556695
Tuba1a	6.11294	4.94442	4.39433	2.67129	6.79896	8.04794	8.06225	8.58671	7.87094	8.65331	9.57878	0.000258356	0.00558637
Bin1	2.56827	3.51867	2.7701	1.58332	3.39145	1.38672	0	0.647193	0	0.220965	0.200909	0.000258645	0.00558637
Tmem263	6.75209	4.71794	5.60448	5.80782	6.56371	2.85667	0.953105	3.22426	4.15948	3.40951	0.12775	0.000263032	0.00567105
Ccdc28b	4.05968	5.34789	3.34202	3.26119	1.54673	6.44795	6.40793	6.32197	6.59387	6.18356	7.35922	0.000264226	0.00568054
Kif12	1.27789	2.32861	2.65206	3.12197	1.95456	0.779738	0	0.163904	0	0	0.236795	0.000264768	0.00568054
Ydjc	2.22278	0.169316	1.03042	0	2.47488	3.99506	3.59032	3.90503	4.91332	3.24707	6.73035	0.000264874	0.00568054
Tmem121	0	1.75965	0	0	0	1.8757	3.34468	4.61259	2.29853	4.07538	7.40986	0.000266773	0.00571119
Bmx	6.49649	4.97539	2.06159	0	7.04594	9.44643	9.34872	10.6402	8.89132	10.0197	46.9612	0.000268551	0.00573916
Hopx	2.551	3.47667	1.16028	3.23117	0.537518	5.69065	5.16641	4.84175	4.46775	4.99211	7.16222	0.000269753	0.00575474
Slc2a10	1.52921	1.49269	0.811565	0	0	2.23348	3.23185	3.69498	3.04877	2.85931	4.7469	0.000271964	0.00579173
Ap1s2	2.06637	0.169316	0.0888809	0	1.29059	3.12102	2.22842	3.47295	3.33711	3.50886	5.31711	0.000274879	0.00584358
Bpgm	5.24232	5.48209	5.5918	1.98867	6.79663	8.06225	8.08484	10.3562	8.42124	10.2415	16.1437	0.000276061	0.00585846
Cd38	1.48077	2.36239	1.20855	1.76174	2.19753	4.25363	3.67428	3.6484	3.12491	3.89036	3.77406	0.00027735	0.00586896
Frmd5	0	0.169316	0	0	0	1.17329	2.32973	2.27285	2.62609	1.38849	3.79534	0.000277858	0.00586896
Arpc5	7.19258	6.86923	6.81357	6.53093	7.34232	8.53679	8.64789	9.26614	8.26262	9.13351	3.52999	0.000278004	0.00586896
Rab3il1	1.85324	1.93345	1.60482	2.80101	2.87307	0	0	0.239338	0	0.905409	0.252759	0.000280331	0.00590784
Rab4b	2.92147	2.93503	3.78916	1.95356	3.71779	4.84541	5.29355	4.9046	5.30348	5.31846	4.19799	0.000281251	0.00591697
Pcolce2	0	4.4034	0	0	4.81941	6.86679	6.18982	6.93222	5.86123	6.83292	25.849	0.000284291	0.00596044
Gde1	4.68098	4.00379	5.18783	4.57395	5.3949	6.29901	6.55441	7.54583	6.45513	7.36217	4.2135	0.000284297	0.00596044
Akr1c12	2.94783	4.85162	3.86808	4.28098	3.94595	2.79427	0.88022	0.303198	0.859482	1.9696	0.162946	0.000285336	0.00597192
Fam13a	2.26462	2.03625	2.48787	3.21291	4.24021	0	1.55494	0	0	0.288171	0.179275	0.000288415	0.00601462
N4bp3	0	0.169316	2.52448	0	0	2.84997	2.09969	4.68299	4.8782	4.55803	9.68006	0.000288778	0.00601462
Ahsa2	0	2.63777	2.95519	2.50675	3.23612	5.60795	5.15346	5.2668	4.50268	4.87667	7.034	0.00028912	0.00601462
Csk	3.71496	4.09397	3.52638	2.66583	4.86078	5.80213	5.55512	6.2348	5.733	6.41616	4.51855	0.000289355	0.00601462
Palmd	4.25325	4.10006	3.51515	7.00698	4.26538	0	0	3.56369	0	0	0.0662733	0.000293317	0.00608657
Cth	4.72389	4.70349	4.38396	2.6046	2.28407	1.52489	0	0	1.93345	0	0.120882	0.000297296	0.00615864
Slc9a6	0.655216	0.169316	0.0970708	2.86998	2.15638	4.75271	3.92335	3.98329	3.18975	4.17887	7.0421	0.000299317	0.00617476
Hes1	4.32852	4.34359	5.36067	5.87225	5.69893	2.25717	3.93958	0.95373	2.7845	1.90448	0.148353	0.000299571	0.00617476
Cd63	8.15894	8.08484	8.429	8.46482	8.41196	6.64199	6.60364	6.48975	5.8768	7.12192	0.294616	0.000299598	0.00617476
Col9a3	2.27768	2.94282	0.750093	1.01656	2.45208	4.5779	4.04268	4.33936	4.17196	3.82991	4.94003	0.000302847	0.00623117
P4hb	8.86052	9.50693	8.68316	8.26262	8.81158	6.57349	6.31817	7.56969	6.31184	7.32498	0.249078	0.000304158	0.00624758
Smtn	0	0.169316	0	0	3.50295	3.26646	3.86568	4.66523	3.80598	3.97144	9.06625	0.000305086	0.00624868
Nr4a2	3.13009	4.64556	1.6971	2.285	2.37858	0	0	1.02985	0	0.0981665	0.164748	0.00030524	0.00624868
Amy2a5	12.6292	13.1051	12.6292	12.6292	13.2749	8.50712	10.2415	7.9827	11.3518	5.55116	0.0572452	0.000311938	0.00637507
Cox7a1	2.94496	3.15511	3.51426	4.38834	2.54929	0	0	0	2.6198	0	0.144944	0.000314151	0.00640952
Cd300a	0	0.169316	0	0	0	1.93022	0.90628	1.98333	2.20328	2.11281	3.46612	0.000318952	0.00649659
Slc7a11	2.02745	1.6211	1.476	1.2832	2.71336	0	0	0	0	0	0.282393	0.000319618	0.00649926
Rab3b	3.17326	2.56233	1.05394	0.706108	3.49994	5.1927	5.85806	4.16537	4.60011	5.5918	7.37424	0.000322832	0.00655366
Samd14	1.8452	0.169316	0.928517	0.688908	1.11396	2.70663	3.87284	2.5114	3.78264	2.71104	4.49316	0.000324133	0.00656909
Palm	2.26623	2.62571	2.68889	1.38454	1.08957	0	0	0	0	0.134648	0.252778	0.000325352	0.00658284
Zfp763	0	0.169316	0.374568	0	0	1.74599	1.15385	2.58484	1.91934	2.82491	3.82911	0.000327675	0.00661871
Gm609	0.722243	2.83158	2.17231	1.59636	3.43913	4.72342	4.98512	4.50076	4.13418	4.51914	5.35245	0.000328214	0.00661871
Cyb561a3	0	0.169316	2.87206	0	0.916737	3.00323	3.99294	2.89172	3.74478	3.98739	6.64555	0.000330487	0.0066457
Ramp1	5.84499	6.79896	6.52628	6.77248	7.9509	4.66435	5.08734	4.04815	4.58694	4.92492	0.230625	0.00033082	0.0066457
Arhgap26	3.95832	3.37345	3.11296	2.96404	2.9044	1.55122	1.9351	1.55787	1.22976	0.885756	0.281129	0.000331192	0.0066457
Ostc	7.21975	7.45142	7.242	6.88622	7.33531	5.91117	5.59972	5.34577	5.67724	5.48913	0.324808	0.000335526	0.00672157
St18	3.62624	0.169316	1.28152	0	2.75334	5.01975	4.70643	4.59733	4.32292	4.78728	8.69784	0.000337583	0.00673998
Snx20	0.801559	0.169316	0	0	1.9449	2.97637	4.42719	2.62571	3.5392	2.1306	5.88344	0.000337897	0.00673998
Poll	1.23019	2.05546	2.64142	2.26711	2.27936	0	0	0.926018	0	0	0.266184	0.000338108	0.00673998
Nmral1	3.72318	3.44885	3.26314	2.88879	3.24961	1.51004	0	1.976	1.66792	0	0.205339	0.000340355	0.00677368
Ndrg2	2.59095	5.11897	3.20262	4.17693	3.61869	0	2.55307	0	0	1.36874	0.128758	0.000341636	0.00678807
Mgat3	1.40938	0.169316	0.491667	0.981345	2.06951	4.39295	3.41993	3.62448	2.26649	3.26022	5.16429	0.000342887	0.00679425
Mob3b	4.01892	1.95456	4.2981	4.20772	3.1318	1.03363	1.55543	1.41334	1.25362	0.56927	0.195175	0.000343065	0.00679425
Tax1bp1	6.52243	6.32197	6.92129	6.40014	6.99492	8.64077	8.01032	8.55215	8.01435	8.43359	3.2447	0.000343781	0.00679735
Fam35a	1.53058	0.169316	0	0	0.316231	4.73146	3.78305	2.55679	2.63442	1.80274	6.49112	0.000344865	0.00680269
Prss1	10.3562	10.6402	9.2853	10.6816	11.1034	4.76483	5.45598	5.27925	10.0197	3.32297	0.0399739	0.00034517	0.00680269
Anxa4	7.55468	6.89291	7.22746	7.40815	7.61567	8.56576	8.92481	9.84836	8.95066	9.79261	3.67225	0.000346304	0.006814
Casp3	2.35219	3.31381	3.40713	0.897895	2.64841	5.18163	4.96086	4.58055	4.85966	4.65836	5.0083	0.000346922	0.00681515
Npm1	8.53089	7.96102	8.79948	8.42124	8.43359	7.28559	6.91714	6.15693	6.56009	6.03377	0.279604	0.000348479	0.00683468
Tspan15	0.738862	2.88349	3.81653	1.19224	3.38297	5.11971	5.00453	5.43683	4.93729	5.40875	6.86186	0.00034922	0.00683818
Lst1	0	0.169316	0	0	0	1.34757	1.90546	1.23341	2.45423	1.97696	3.3628	0.000354048	0.00691575
Syce2	3.61756	4.17774	3.45539	3.06626	4.42377	0	0	1.67337	0	2.87798	0.139867	0.000354318	0.00691575
Capsl	6.46468	4.87984	4.0873	4.85707	3.84473	4.3152	0	0	0	0	0.0640933	0.000354941	0.00691679
Arhgap4	0	0.169316	1.21139	0	0.273157	2.85842	1.14576	3.12491	2.53632	3.0945	4.66284	0.000359757	0.00699943
Prim1	5.22013	5.9821	3.79315	2.87496	3.13451	0	0	2.41711	1.31387	1.22182	0.108036	0.000360746	0.00700747
Chat	0	2.07287	0	0	0	2.80409	3.85901	2.94072	3.52196	1.74599	5.89618	0.000363214	0.00704416
Pcsk2	5.01456	5.08982	4.32637	0.430906	5.37617	1.04719	0	0	0	0	0.0699212	0.000364239	0.00705277
Psmb10	8.8508	9.05178	6.62597	8.29948	7.86413	5.6682	6.32197	5.3162	6.09263	5.72799	0.201237	0.000365277	0.00706163
Itih4	2.37122	1.70935	0.849482	3.25186	2.62039	0	0	0	0	0	0.223685	0.000367425	0.00709015
Ttr	7.70499	7.08979	7.60938	7.18391	5.62352	5.06906	4.34268	5.53246	4.79406	4.17502	0.208821	0.000367918	0.00709015
Dhrs3	6.09769	5.60448	6.2093	5.97857	6.47611	4.01619	0	2.45443	3.96491	3.65481	0.104736	0.000370129	0.00712146
Arhgef28	2.28987	0.169316	4.42814	1.00605	3.40112	5.53923	5.3666	5.93605	5.27195	5.58299	9.71669	0.000373675	0.00717747
Idi1	0	0.169316	0	2.83205	4.52713	5.21337	5.32316	5.38148	5.25947	5.20639	13.6523	0.000375254	0.00717747
C1qbp	6.02205	7.01823	6.6991	5.95394	6.46661	4.41461	3.88208	4.91332	5.05889	4.57876	0.275008	0.00037527	0.00717747
Fam92a	4.58122	5.68927	5.14148	5.33585	4.53657	1.21443	3.10353	2.96032	0	3.25219	0.129338	0.0003754	0.00717747
Gng12	8.36932	8.35412	7.62847	6.79663	8.06848	10.7472	9.6887	10.8245	8.93147	11.1625	5.37941	0.00037823	0.00722022
Klrb1c	0	0.169316	0	0	0	6.28284	0	6.22186	5.28744	5.80091	25.7187	0.000379108	0.00722563
Tob1	5.99332	6.56855	5.97857	6.52111	5.90297	4.93593	4.10093	4.16859	4.75481	4.39486	0.303153	0.000379706	0.00722571
Eif4b	5.38236	5.64169	5.48069	5.83335	5.13624	4.11589	3.68534	3.34562	3.97425	4.02572	0.315234	0.000380356	0.00722677
Chst2	4.18835	5.13862	2.86858	2.18933	2.62309	0.754389	1.21189	0.336929	1.24313	0.0396715	0.155567	0.000382341	0.00724925
S100a13	5.07593	5.29193	5.32807	5.11614	5.21621	7.45787	7.51849	6.36531	6.97195	6.51841	3.38875	0.000383218	0.00724925
Exog	3.60354	3.85955	3.56325	3.45657	3.61286	0	0	1.67011	0	2.93302	0.15405	0.000383702	0.00724925
Slc25a20	2.15452	3.61158	2.98539	2.04014	4.77994	4.76248	5.32725	6.73929	6.10203	6.53394	6.86227	0.000383924	0.00724925
Tppp3	4.29379	3.95203	3.23117	0	6.00813	6.69158	7.5496	7.98627	7.29644	8.67478	17.6636	0.000386758	0.00728909
Rhov	2.92955	5.87511	4.64279	4.72929	6.26706	0	0	3.68427	0	1.80464	0.0722439	0.000387233	0.00728909
Lyn	0.588482	2.03676	4.10093	3.81581	3.96068	5.79405	6.01656	6.09954	5.81992	5.67724	7.89493	0.000388523	0.00729542
Rgs22	0	0.169316	0	0	0	3.09614	1.06219	2.64366	4.42652	1.90237	6.03065	0.000388973	0.00729542
Naip2	1.33817	0.169316	0	1.03189	0.318163	3.50406	2.44866	2.06353	3.40186	2.11487	4.39264	0.000389369	0.00729542
Smim6	5.06262	6.01529	5.84327	5.29193	4.83767	7.18835	7.80967	7.03711	6.9289	7.1807	3.52786	0.000392271	0.00732579
Mctp1	4.29461	0.169316	0	0	4.36992	6.2566	5.81992	5.64169	5.51009	7.82106	21.7524	0.000392555	0.00732579
Rab25	7.85361	8.0346	8.76717	8.60677	8.36433	9.10466	10.3149	11.7892	11.0336	11.2135	5.15467	0.000393242	0.00732579
Asns	6.31184	7.24645	7.64395	7.09973	7.09237	2.81213	4.96678	5.34852	4.56353	5.41344	0.182	0.0003934	0.00732579
Ppic	4.92492	5.01322	7.07998	5.03384	6.39279	2.6347	2.57787	1.12294	4.61056	2.27391	0.121165	0.0003942	0.00732947
Plk4	2.50771	4.01554	2.26551	2.15298	2.90184	0	0	1.86714	0	0	0.190084	0.000397131	0.0073727
Oas2	0	0.169316	0.0622813	0	0	2.16098	2.71984	1.92222	0.769061	2.51873	3.9227	0.000398708	0.00739069
9130230L23Rik	0	0.169316	2.84902	0	3.92124	5.062	5.70952	4.5509	4.47207	4.76882	11.5094	0.000399346	0.00739124
Magt1	7.32498	7.56969	6.94207	6.9555	7.32498	5.396	6.06395	5.38042	5.62735	5.43093	0.320032	0.00040346	0.0074522
Cpb1	12.0417	12.4565	11.7506	11.7892	12.3162	8.81158	9.10466	7.13057	10.3948	4.46109	0.0587081	0.000403865	0.0074522
Tle6	2.21885	2.32178	1.77515	3.17087	3.54408	0	1.3254	0.447032	0	0.630749	0.22917	0.000409159	0.00752453
Eaf1	2.56993	2.4026	1.47172	1.92969	1.26288	4.00585	3.57494	4.2455	3.90417	3.28981	3.67231	0.000409841	0.00752453
Suco	2.04014	4.70689	2.89527	2.30488	2.34551	6.03252	5.80091	4.71128	5.74241	4.74454	5.84739	0.00041002	0.00752453
Sec14l1	3.47527	2.4115	2.83443	2.9306	2.11713	4.35346	4.66122	4.73022	4.70511	4.19975	3.42515	0.00041026	0.00752453
Gm2016	3.34417	5.72704	0	0	2.32436	6.58206	6.35789	7.79169	6.02968	6.58206	20.96	0.00041451	0.00759102
Oas1g	0	0.169316	0	0	3.95863	3.64754	3.78594	3.81215	5.00074	5.16481	10.9788	0.000425319	0.00777133
Gm6756	1.71547	2.01359	2.04047	1.56849	2.87437	0.556119	0	0.243526	0.5414	0.0241081	0.293321	0.000425634	0.00777133
Pdia6	7.74335	8.28153	7.81703	7.41561	8.42124	5.89227	5.35749	6.42081	5.02733	6.80791	0.244078	0.000428768	0.00780615
Phlda1	3.55605	4.53657	3.6686	3.03615	4.41594	5.84706	5.37394	5.38815	5.93605	6.32338	3.81334	0.000428825	0.00780615
Ube2c	5.47015	0.169316	5.47429	4.42719	3.85364	0	0	0	0	0	0.067972	0.000430618	0.00782707
Ripk3	0	5.32316	2.59856	0	3.65778	5.55512	6.83535	6.8221	6.44643	6.86428	18.2365	0.000431928	0.00783916
Slc17a9	2.42672	3.49757	1.88553	3.40532	2.54626	0	0	1.17192	0	1.48307	0.214451	0.000436142	0.00790385
Tmem141	0	4.00244	2.80766	3.49332	3.12872	5.47429	5.86213	5.71679	5.78064	5.47806	7.86776	0.000437583	0.00791817
Sema3e	0	0.169316	1.02845	0	0	3.07078	1.70042	2.51576	2.74879	1.3518	4.10664	0.000443201	0.00800791
LOC100504703	0	0.169316	0.72154	0	0	2.32895	2.12904	1.19137	2.31786	1.73429	3.39199	0.000444502	0.0080195
Pfn1	9.79261	9.22253	9.64514	9.55173	9.91496	10.9739	11.6618	10.8708	11.2791	11.9588	3.30233	0.000446022	0.00802325
Ctsl	7.30646	7.93363	8.00367	8.429	8.98129	5.00533	1.38353	5.71551	4.89879	6.01656	0.0867577	0.00044603	0.00802325
Klf4	0.842806	2.01788	0.934272	4.31782	0.193825	6.06952	4.99829	4.13378	5.54355	4.20309	10.0444	0.000447738	0.00804209
Klk1b3	6.1008	0.169316	6.21323	7.69479	4.52406	0	0	0	0	0	0.0325671	0.000448593	0.00804557
Rabgap1l	4.03116	4.8964	4.86033	3.11258	4.62053	7.12369	7.16823	5.91777	6.19126	5.98923	4.51222	0.000449524	0.00805039
Fbxo25	1.43567	4.30353	2.42734	0	3.65098	5.69334	4.79699	6.12442	5.97656	5.63407	9.72416	0.000452362	0.0080893
Mknk1	4.12137	4.30744	4.22528	4.47994	4.81665	0	2.56521	2.97358	2.53776	1.0831	0.169787	0.000453847	0.00810394
Fam101a	0	0.169316	0.0113721	0	1.5992	2.28943	1.86782	2.6806	2.43683	2.17596	3.82153	0.000457009	0.00814729
Slc25a12	3.31085	2.71201	4.20163	3.18518	3.8309	4.82638	5.04354	5.92756	5.23971	6.07985	3.93208	0.000457615	0.00814729
Oasl2	0	0.169316	0.316012	1.56055	1.50531	1.97502	2.93919	2.88733	3.6737	2.89562	4.48135	0.000460959	0.00819483
Pkp1	0	0.169316	0	0	3.01665	4.72555	3.8973	3.50057	3.70648	2.28576	7.92242	0.000462139	0.00820382
5930403L14Rik	2.31615	2.52999	2.13582	1.94816	2.14531	0.91178	0.967342	0.581932	0	0.276053	0.314762	0.000462814	0.00820382
Cyp39a1	1.40438	4.41415	4.85611	3.93271	3.6317	0	0	1.45406	0	1.78254	0.124957	0.000465861	0.0082458
Tmem98	4.05843	6.80791	6.61557	7.12192	6.57129	7.98627	8.8508	9.56724	8.72836	9.97857	6.903	0.000471276	0.0083187
Rbm38	1.92605	4.19486	0	0	5.78424	6.05962	6.02703	8.36932	7.13057	8.16314	27.2636	0.000471347	0.0083187
Psmg4	3.09547	2.71104	3.26456	3.80124	1.51259	5.29125	4.80806	4.60316	5.69334	4.75481	4.44796	0.000479787	0.00845537
Sec16b	2.96112	4.56171	5.19423	3.21712	4.27109	3.31085	0	0.139902	0	1.16397	0.115174	0.000482162	0.00848493
1700011H14Rik	6.37139	5.3666	4.85966	6.03377	2.46808	0	2.5852	2.52134	2.05884	0	0.0832259	0.000494676	0.00868326
Eml2	2.43342	1.5992	2.45065	2.03011	2.72407	1.09236	0.762548	0	0	0.342641	0.285591	0.00049486	0.00868326
Ppap2b	6.14677	5.95106	4.79324	4.64601	6.20573	2.57036	2.70394	3.94823	0	3.19189	0.119437	0.000500629	0.00877182
Rrs1	3.06492	2.65068	3.14537	3.31985	3.10179	0.498413	0	1.49117	2.25603	0.458368	0.23073	0.000503249	0.00880504
Usp2	3.12197	2.05884	2.24953	2.82883	1.11601	0	0	0.693883	0	0.629299	0.248204	0.000511989	0.00894092
Fam107b	5.94083	3.36936	3.82504	4.77155	5.25364	0	1.27555	2.88083	2.88986	1.22772	0.126983	0.000512485	0.00894092
Nr3c1	5.65137	4.12853	4.33968	4.77406	4.56353	2.6149	3.29864	2.07926	3.32766	2.27717	0.254916	0.000513323	0.0089427
Spink1	10.8245	10.9739	9.37962	10.8245	10.3948	7.84388	8.36932	5.98103	9.21166	5.56	0.117744	0.000516806	0.0089905
Rab27a	4.95048	3.64186	3.36217	3.97785	4.84477	6.944	6.34486	6.23101	5.30425	6.36339	4.23416	0.000521685	0.00905646
Try5	11.2791	11.1034	9.21166	11.1034	10.9739	7.55468	7.01357	4.87231	9.37962	3.22916	0.0499138	0.000522638	0.00905646
Coprs	0	2.54273	2.11956	2.76847	2.85066	4.61196	4.57683	4.31735	4.70414	4.16702	5.34866	0.000522832	0.00905646
Rbp4	5.92876	7.78777	4.31437	2.47776	5.99806	3.95614	0	0	0	0	0.0438853	0.00052539	0.00908263
Fam98c	0	0.169316	1.55221	2.5857	2.51547	3.77957	3.29244	4.9339	3.70048	4.52069	6.41246	0.000525836	0.00908263
Kcnd3	0	0.169316	0	3.69926	0	5.8	5.56987	4.57327	2.27558	4.32292	13.3116	0.000528586	0.00911716
Slc6a8	0.699422	0.169316	0.614071	1.95577	0.47041	2.97548	2.89841	1.93282	3.47944	2.77165	4.08336	0.000537626	0.00925996
Vsig1	1.51389	2.42469	5.14312	2.26355	2.92955	0.722243	0	0.121751	0	0.0595232	0.156664	0.000544318	0.00936196
Ly6g6d	3.04272	0.169316	1.29991	0	4.46624	4.77526	5.87613	4.99504	5.80508	4.9545	11.2011	0.000547146	0.0093973
Rhog	2.88733	4.47548	4.07267	2.96032	4.95105	5.70684	5.63407	6.29501	6.69158	5.8974	4.51776	0.000552423	0.00947456
Bex1	4.5832	5.25688	4.06853	0	4.02122	0	0	0	0	0	0.0832754	0.000554879	0.00950329
Acnat1	5.35875	2.88804	6.12074	5.50291	6.18041	1.2914	2.6384	2.8545	0	2.89228	0.103317	0.000555903	0.00950743
Plcxd2	4.32601	2.81686	2.45385	2.69519	2.50316	0.702836	0	1.25911	1.63533	0.269498	0.219812	0.000562397	0.00959165
Rpl22l1	8.59881	8.50712	8.31761	8.47258	8.18565	7.44473	6.6991	6.16781	7.01357	6.31817	0.310427	0.000563103	0.00959165
Bcar3	0	0.169316	1.43307	0	0.352413	2.06951	1.44061	2.81517	2.93435	3.60776	4.53945	0.000563194	0.00959165
Slc35g1	5.09377	3.66784	0.632937	3.83563	1.89763	7.03065	6.9577	5.62735	6.43334	5.65912	9.95949	0.000564471	0.00959995
Dmd	2.38013	3.6805	2.96342	3.33306	3.61388	0	1.50048	0.606082	2.30153	0	0.2013	0.000565265	0.00960003
S100a16	6.34486	7.60245	7.30646	7.55983	6.52243	3.96491	6.08558	3.83527	5.51402	3.86931	0.187714	0.00056968	0.00966152
Cpeb2	1.74177	1.77322	0.542755	1.24375	1.75315	3.16714	2.86782	3.29984	3.17983	3.02003	3.24002	0.000573319	0.00970969
Ntrk2	4.09129	5.42515	2.8327	2.51758	3.5056	0	0	0.240123	0	2.85363	0.120265	0.000574656	0.00971665
Rb1	2.64008	2.55918	1.85285	1.84371	0.244227	3.6213	4.45442	3.80817	4.03347	4.00042	4.45537	0.000575328	0.00971665
Slc39a4	3.3141	4.6502	3.51322	3.19379	3.31381	1.32379	1.85659	0.922437	2.61416	0.979417	0.240191	0.000577383	0.00973466
Srp54b	0	0.169316	0	0	0	0	4.42652	4.09759	4.16366	3.88208	9.71428	0.000577995	0.00973466
Cdx1	0	0.169316	0	0	0	2.00633	4.19486	1.25851	3.90503	1.67239	5.95276	0.00058098	0.00977139
1110008L16Rik	0	2.04441	3.23348	2.42851	3.39704	5.0291	5.20953	4.68909	4.69054	4.59291	6.15409	0.000583501	0.00980024
Entpd8	0	1.56236	0.941712	0	0	2.10076	3.22804	2.59331	2.15098	2.31131	3.93418	0.000584814	0.00980647
Ifi27l2b	3.2884	1.64774	4.89509	4.18609	4.7186	6.35106	6.8988	6.24887	6.52418	5.81694	6.15086	0.000585485	0.00980647
Aldh7a1	5.86213	6.64825	5.61021	6.02561	6.10203	2.25983	3.65923	4.89105	3.22478	4.67339	0.201942	0.000594808	0.00994893
Cxcr6	0	0.169316	0	0	3.23773	2.72739	3.00958	4.33112	3.68876	4.02421	7.33502	0.000598411	0.00997305
Med27	3.35455	2.20572	2.382	2.44222	1.73907	4.86742	4.89977	4.06629	3.61158	4.2596	3.77433	0.000599806	0.00997305
Pnpla6	1.96989	2.60115	2.37948	2.62039	3.03392	4.39433	3.74924	3.97272	4.31292	4.2797	3.07549	0.000600091	0.00997305
Slc25a23	2.69574	3.12551	2.56926	3.55605	2.45657	1.2526	1.21627	1.71756	0.903744	0.341818	0.288326	0.000600738	0.00997305
Chka	5.92638	5.92466	5.41895	5.09692	5.54003	3.21398	4.05843	4.18781	3.6785	4.30172	0.309219	0.000600759	0.00997305
Cdip1	3.25594	3.80875	2.69495	3.01001	3.15939	2.05606	0.839264	0.680962	1.23819	1.88174	0.278054	0.000601171	0.00997305
Polr3g	0	2.60334	0.13663	0	0.397494	3.79381	3.73212	3.67012	1.88798	3.0314	6.04438	0.00060906	0.0100901
Madd	3.86162	0.169316	0.318625	1.76611	1.76654	4.81115	5.11489	4.90167	3.65358	3.98604	7.55287	0.00061006	0.010093
Hebp2	1.61054	3.90143	2.53694	2.30153	1.85384	1.14333	0	0	0	0.315688	0.225461	0.000618876	0.0102232
Bex4	4.92983	0.169316	3.51838	3.46891	3.43216	0	0	0	0	0	0.116329	0.000619616	0.0102232
Snd1	6.62157	7.16823	6.42227	7.21732	7.14622	4.20825	4.62861	5.71067	5.6682	5.101	0.277052	0.000621938	0.0102477
Zfp428	0.488941	1.62873	0.960137	0	2.70394	3.0915	3.04497	4.1574	3.423	3.53254	4.90256	0.000623659	0.0102621
Arhgap29	2.80684	2.68514	2.52195	3.27311	1.64581	0.672178	1.00886	0.122688	1.3648	0.403664	0.273169	0.000625898	0.010285
Cfp	0	1.82388	1.50638	0	0.528077	3.49164	2.33056	4.73208	2.20694	4.43118	6.35023	0.000632186	0.0103729
Tenm4	4.52263	6.51594	5.45173	4.70414	3.9791	1.05051	3.57734	1.29337	3.49111	1.33475	0.135345	0.000633241	0.0103729
Spred1	3.74843	3.92259	1.77982	3.10603	2.63224	2.01061	0.919759	0	0	0.40223	0.193271	0.000633804	0.0103729
1810064F22Rik	3.67205	4.08108	3.01052	3.87323	4.28921	1.35659	2.85481	2.032	0	0.102861	0.174831	0.000636057	0.0103958
Mcm5	1.95917	2.28783	2.85221	2.18909	0.758174	0.521404	0	0	0	0	0.267014	0.000637087	0.0103986
Peg3	5.44412	5.2031	3.70469	2.39561	3.6067	2.80205	0.815904	1.51782	0	0.0291429	0.121763	0.000638686	0.0104108
Thap6	0	0.169316	0.185172	0	0	1.33715	1.76765	1.42945	1.43803	1.71623	2.76409	0.000640899	0.0104328
Gm6644	4.91941	5.90297	6.04987	6.04818	6.24103	7.19258	7.20787	8.60677	7.50861	8.36932	3.84968	0.00064527	0.0104899
Cdk1	3.63636	3.69498	3.48847	0	3.78481	0	0	0	0	0	0.132043	0.000647283	0.0105086
Tmem109	2.56172	4.16702	4.02181	3.27623	3.92639	0	1.39766	0.635242	1.8334	2.46321	0.199612	0.000649087	0.0105239
Pfkfb3	2.73416	1.91446	0.26175	1.78149	3.19899	2.92629	5.36418	5.57804	4.71488	5.5662	7.21874	0.000651674	0.0105517
Fut2	1.3225	1.6017	3.24534	0	3.24572	4.04018	4.28098	5.51086	4.26138	5.16814	6.81755	0.000654044	0.010576
Pamr1	2.05315	4.02797	4.88441	4.20163	4.54597	2.26964	2.16659	1.07568	0.90788	0.220676	0.163285	0.000655902	0.010592
Zfp873	0	0.169316	0	0	0	1.05394	2.75334	1.18924	2.61238	1.94294	3.67185	0.000660991	0.0106585
2010204K13Rik	3.69282	4.94543	3.19686	4.24939	2.87798	2.88986	0	0	1.84321	0.29704	0.14494	0.000661776	0.0106585
Gls2	3.57339	5.04497	5.70684	5.78207	5.65697	0	3.21482	2.98089	1.50241	3.17412	0.126885	0.000666509	0.0107079
Gdpd1	1.23763	4.17563	0.162253	2.70225	3.45975	4.99599	5.23058	5.13624	5.47938	5.56332	7.64014	0.000666605	0.0107079
Enox2	1.47505	0.169316	0.113078	0.551041	0.202464	2.92147	4.17353	2.30536	1.47957	2.97259	4.8176	0.00067504	0.0108291
Micall2	1.04719	0.169316	0.183294	1.54185	0.333421	3.49411	2.52617	2.31544	3.21482	1.78802	4.03536	0.000678759	0.010869
Manf	8.00367	7.47371	7.24945	7.19654	7.31319	6.12622	6.2348	5.09944	5.78424	5.70824	0.317159	0.000679315	0.010869
Il6st	4.13224	2.77872	4.03252	3.62448	3.31985	2.58484	1.15767	0	0	1.95356	0.184495	0.000681062	0.0108827
Ccdc141	3.61961	4.32951	3.40148	3.0419	3.25265	2.37081	2.36636	0.458368	0	0.0303068	0.178765	0.000682166	0.010886
Aqp5	5.45674	5.24645	10.0835	7.61567	6.6848	2.22369	4.96271	0	0	3.82872	0.0355402	0.000686211	0.0109362
Entpd1	1.80534	3.64598	1.14452	2.7095	2.31937	0	0	0.959338	0	0	0.227971	0.000700144	0.0111313
Cyhr1	3.42997	2.80101	4.71993	4.86078	4.21421	6.14485	6.42081	5.9336	5.92158	5.63487	4.01657	0.00070028	0.0111313
Gstm1	8.49724	7.73452	7.90008	8.39398	7.26661	5.94083	6.26184	5.74074	7.05782	5.51796	0.2765	0.000711094	0.0112739
1700049E15Rik	4.3316	5.56888	0.403664	4.02652	2.49639	0	0	0	0	0	0.097031	0.00071111	0.0112739
Blvrb	1.82786	0.169316	1.56849	2.31392	1.24097	3.83563	3.37172	3.17326	2.87798	3.70872	3.91592	0.000713041	0.0112898
Ackr4	0	0.169316	0.00627267	0	0	1.93449	2.87798	1.89075	0.623611	2.87206	4.01295	0.000724419	0.0114551
Fam83e	0	2.25337	1.47764	2.45351	0.153113	3.9239	3.45975	4.01379	3.27206	3.26893	4.99387	0.000729032	0.0114993
Gm10334	10.0835	10.2791	9.39544	10.3562	10.6816	0	5.31922	4.69303	9.64514	2.36444	0.0185195	0.000729108	0.0114993
Fads1	4.80725	5.83511	4.28862	3.21859	2.39302	2.02304	0	0.184141	2.57601	0.311459	0.117474	0.000739395	0.0116464
Myo7b	0	0.169316	0	2.02171	0	2.26623	2.86539	2.3399	2.12058	2.63224	4.01852	0.000744246	0.0117077
Dok3	0	0.169316	0	0	2.57637	3.29412	1.6994	3.71846	3.24472	3.52638	5.84613	0.00075114	0.0118009
Pagr1a	2.27623	2.55334	3.33075	3.14306	3.2847	4.35838	5.11064	4.26538	4.7475	4.40984	3.16177	0.000767202	0.0120376
Sptlc1	2.24732	3.38733	2.17384	1.6253	2.86684	4.25134	3.98329	4.62776	3.93437	4.50549	3.48299	0.000772776	0.0121095
Gstz1	5.21796	4.86033	5.48209	4.5475	4.56598	2.99727	3.84632	3.48156	3.29375	2.80205	0.318512	0.000775083	0.01213
H2-M3	2.32861	2.68659	2.59292	1.86423	3.4591	0	0	0	0	2.07005	0.22186	0.000778841	0.0121686
Rgs14	0	0.169316	0	0	0	1.84073	1.50463	1.84321	1.47038	0.992543	2.82145	0.00077955	0.0121686
Slc2a4rg-ps	0	0.169316	0.116106	0	0	1.04484	1.34131	1.87891	1.60785	2.14531	2.92119	0.000781282	0.01218
Mki67	3.05648	3.48818	4.5398	1.76869	0.961513	0	0	0.261235	0.585771	0	0.16568	0.000784074	0.0122079
2210414B05Rik	0	0.169316	0	0	0	0	3.83563	3.28078	4.74295	4.00179	8.80525	0.00078874	0.0122648
Slc4a8	3.75183	3.8984	1.60394	0	3.37255	5.76611	5.55369	5.40875	5.96375	4.84477	7.9012	0.000793331	0.0123204
Atp8a1	4.42572	0.169316	4.0697	1.24511	1.46014	4.5475	5.17519	5.96257	6.00308	6.80591	10.7395	0.000795821	0.0123433
Gramd1a	3.84103	4.09061	3.56813	2.77056	3.82872	2.5448	1.60482	0.91234	1.38608	2.25803	0.271948	0.000803626	0.0124431
2200002D01Rik	0	2.04369	4.78241	5.87932	4.50165	8.63497	8.09118	6.41901	7.62847	6.91277	17.0993	0.0008043	0.0124431
Ssr3	6.71315	6.93222	7.59376	7.0441	7.18391	5.27284	5.35438	6.08455	5.32316	5.62976	0.339037	0.000809984	0.0125151
l7Rn6	5.27699	6.49198	5.81535	5.77116	6.17789	1.99196	4.16302	3.12803	4.27353	4.67281	0.208656	0.000812783	0.0125424
Mif	6.78849	7.30646	6.02866	6.88039	6.36941	5.18997	5.42101	4.75111	4.88963	5.01042	0.324828	0.000815329	0.0125648
Wdr11	2.15688	0.169316	0.329273	0.610956	1.23496	4.0802	3.29443	3.19686	2.16508	2.56687	4.47042	0.000816301	0.0125648
Capza1	2.39824	2.20601	3.08034	3.60396	4.00937	5.15433	4.51313	5.30631	4.51203	5.45485	3.80671	0.000829063	0.0127451
Pex11a	3.71737	4.4532	2.22987	3.64909	3.8721	0	0	2.16352	1.40093	2.06159	0.181858	0.000833419	0.0127959
Cdca8	4.00434	4.05792	3.18219	4.68776	1.06648	0	1.17271	1.64455	0	0.301103	0.145989	0.000834883	0.0128022
Ptgs1	2.88986	4.48041	0	0.415051	4.84849	6.16333	5.98103	6.5618	6.23765	6.07136	12.784	0.00083625	0.0128071
Mlip	0	0.169316	0	0	0	1.37671	1.10475	1.7192	1.46166	1.6881	2.70611	0.000841888	0.0128772
Ppapdc1a	2.60288	4.28792	0	0	0.720698	4.79699	5.17219	4.36903	4.35216	4.8833	9.14151	0.000844604	0.0129025
Shisa6	2.54566	0.169316	0	0	0	4.40539	2.98596	3.19323	1.93707	2.95949	5.86949	0.000847381	0.0129287
Mpp1	2.92629	3.23813	3.16074	4.39486	3.38023	2.24818	0	1.96865	1.44006	0	0.204664	0.000856219	0.0130467
Prss32	0	0.169316	0	2.89269	2.87933	3.86472	3.22426	4.63154	3.90985	4.52263	7.17179	0.000857264	0.0130467
Try10	11.7506	11.5667	9.84836	11.2791	10.8245	8.07365	0	5.27284	9.24005	3.58144	0.0176983	0.000859343	0.013062
Tsr1	4.85611	3.22426	4.47994	5.93605	6.03118	7.21286	6.73562	7.48554	6.96105	7.48314	4.82368	0.000864024	0.0131168
Atp4a	0	0.169316	0.766235	0.601436	1.39013	2.95141	2.26551	4.58627	1.67778	5.06609	6.60697	0.000866269	0.0131345
Knstrn	1.45406	1.85033	3.06389	2.10019	1.33715	0	0	0	0.595731	0.364733	0.293406	0.00087052	0.0131825
Wsb1	3.87323	4.72342	3.7611	5.20493	4.59549	2.17481	3.22063	3.17087	1.81926	1.13381	0.228814	0.000873441	0.0132009
Cox7a2	7.80967	7.92826	7.10718	7.60938	6.9532	9.24005	9.46472	8.8508	8.98129	8.76717	2.98818	0.000873909	0.0132009
Sel1l	6.7607	7.43423	6.4383	6.79361	5.77116	5.50189	4.70004	4.51377	2.50161	4.29667	0.197949	0.000876272	0.0132191
Anapc15	0.956918	0.169316	0.0428942	0.420952	1.56772	2.29609	2.3969	2.73599	1.93776	2.39824	3.29764	0.000877286	0.0132191
Sumf1	1.82236	3.95944	2.57935	3.81539	3.65975	5.32941	5.39421	4.55803	5.24135	5.4425	4.07229	0.000892142	0.0134263
Qpct	3.21331	0.169316	2.38125	4.11828	3.43819	0	0	0	0	0	0.157774	0.000893661	0.0134325
6430573F11Rik	3.78853	2.31684	1.42283	1.95858	2.37312	0	1.35059	0	0	0	0.232958	0.000896311	0.0134557
Ifitm2	8.45318	8.22225	8.62991	8.68316	8.53679	6.8945	6.49198	6.63224	7.33173	7.49095	0.344654	0.00090908	0.0136306
Serpinb9	2.97753	4.26138	5.62424	5.8	5.12662	0	0	3.2489	3.26084	0	0.0911253	0.000915135	0.0137016
Sort1	3.20652	3.82822	3.84686	4.40151	3.93437	6.21185	5.88627	5.21271	5.03642	5.27699	3.20728	0.000916067	0.0137016
Rasgrf2	3.08208	3.62317	0.940178	0	0.269985	5.63656	5.51134	3.81014	4.57395	3.91036	8.60626	0.000925547	0.0138264
Cd59a	4.54138	4.33355	2.33056	4.68975	4.23962	1.3456	0.922779	2.42134	0.774565	2.75094	0.191587	0.000936848	0.0139647
Slc38a4	5.58668	4.22575	1.79124	3.88508	2.50932	2.5204	0	0	0	0	0.116991	0.000937104	0.0139647
Cd47	5.45173	6.78849	6.78532	3.88563	6.6949	8.31761	7.92826	8.59881	8.14758	8.41196	5.13238	0.000942701	0.0140309
Lrrc26	0	0.169316	2.86325	1.41195	1.65491	2.42183	4.1943	3.92194	4.63237	3.61317	5.80315	0.000946903	0.0140762
Peli2	1.5661	0.169316	1.90508	0	0.0845973	3.12048	3.38811	2.74319	1.86934	3.18715	4.3368	0.000959745	0.0142404
Cox5a	8.08484	7.84388	7.47371	7.95512	8.04794	9.97857	9.37962	9.01275	9.33454	9.22253	2.83728	0.000960292	0.0142404
Kcnq1ot1	5.32398	4.32355	4.2767	4.57109	3.91796	3.56221	2.08759	2.76184	2.74692	2.45098	0.295095	0.000962252	0.0142521
Bvht	0	0.169316	0	0	0	2.83925	2.08462	0.926727	2.11328	1.14668	3.45395	0.000965667	0.0142853
Txndc16	3.0061	3.94653	2.8569	2.73217	0.0970708	4.47832	5.56	5.25412	4.87984	5.57804	6.15734	0.000971377	0.0143523
Tmem114	0	0.169316	0	0	0	3.17164	4.08878	4.38834	0	3.08955	7.53599	0.000978921	0.0144417
Sulf2	1.80072	2.49068	3.87593	3.54233	4.27793	2.01129	0	0.468354	1.38409	0	0.186239	0.000979804	0.0144417
Gfpt1	6.48491	5.98363	6.36741	6.07432	5.15346	5.44708	4.1621	3.21423	3.49825	3.50851	0.242035	0.000987319	0.0145237
Rgs2	7.48554	7.98627	5.56755	6.65567	8.22225	9.30111	8.54465	9.43073	9.97857	10.6402	5.26196	0.000988925	0.0145237
Eml1	1.9683	2.44644	4.09195	3.86108	3.53694	2.2135	0	0.832673	0	1.09281	0.195719	0.000988946	0.0145237
2019-03-02	1.56098	0.169316	1.11988	1.09865	0	3.68265	2.08826	2.53054	2.19015	3.70845	4.14176	0.000993276	0.0145564
Cyfip2	5.7578	4.82604	1.73236	1.93855	3.36936	0.837118	0	0.438455	0.972909	0.435765	0.126046	0.000993567	0.0145564
Adgra2	2.66237	4.63237	1.05861	3.98775	3.57274	1.39325	0	0	0.673424	0.831318	0.164576	0.000998387	0.0145944
Mpzl2	3.72066	4.67281	4.87578	4.52406	4.11182	3.82613	1.31975	0.347	2.63035	1.05615	0.17133	0.000998565	0.0145944
Aldh1l2	5.55751	5.18724	0.744386	3.84726	2.98596	0	1.59013	0.157528	0	0	0.100485	0.00100615	0.0146779
Npm3	2.14623	3.07951	2.56754	3.17357	3.15552	0.59726	1.2173	0.420952	2.15546	0.408008	0.274585	0.00100669	0.0146779
Gal3st1	0.919759	0.169316	0.459596	2.22722	1.22	2.86471	2.47232	2.92819	3.59138	2.62777	3.72618	0.00101069	0.0147185
Aldh1a1	4.08767	4.12794	4.27491	4.76308	3.30045	1.28205	2.53054	2.81122	0	2.37241	0.201442	0.00101592	0.0147617
Cdt1	2.09864	3.18054	0.886709	1.70373	3.19001	0	0	0.792739	0	0	0.240919	0.00101674	0.0147617
Gm15545	2.46321	3.58609	1.66721	1.80631	2.67187	0	0	1.63289	0	0.332612	0.242182	0.0010183	0.0147617
Dock1	4.32444	4.42787	4.0476	4.69387	2.31342	3.28981	0	1.63022	0.866475	0.391535	0.151162	0.00101851	0.0147617
Hhat	1.81969	3.63259	0.564356	3.82258	2.62177	0	0	0.405454	0	0	0.188012	0.00102278	0.0148059
Rhobtb3	5.76402	5.15633	4.02797	4.12794	3.93958	1.93805	0	1.13129	3.46799	2.89489	0.152119	0.00102787	0.014862
Smad7	3.09218	2.84473	2.99238	3.83812	2.40932	0	1.10579	0.435765	2.56993	0.0767705	0.217986	0.00103288	0.0149167
Rprm	3.37501	2.88214	0	4.24487	4.74039	0	0	0	0	0.0702862	0.122053	0.00103849	0.0149798
Limd2	3.36736	4.26603	3.73671	3.69895	5.1334	4.87984	5.87932	6.4104	6.79081	6.19862	3.97598	0.00104046	0.0149859
Sema6a	2.6825	3.39078	2.70032	4.22145	0.120283	0	0	0	0	0	0.162322	0.00104137	0.0149859
Cpeb4	3.15344	2.46888	2.26124	3.92299	1.80918	4.55803	4.93082	4.31073	4.78241	4.31562	3.62097	0.00104279	0.0149886
2010320M18Rik	4.11274	1.82004	3.79969	3.16931	4.00379	5.26633	5.50291	5.10692	5.64326	5.18438	3.88966	0.00104607	0.015018
Ivns1abp	3.73563	5.30631	4.60932	4.13766	5.4233	6.49843	5.94949	6.88995	6.13602	6.86679	3.54477	0.00104972	0.015037
Sestd1	3.2586	1.53522	2.06353	2.73388	2.00427	0.891014	0.994555	0	0.592398	0.183657	0.289819	0.00104987	0.015037
Desi1	3.63297	2.78101	3.4273	4.31652	3.85834	5.40135	4.88119	5.34676	5.2054	5.20953	3.04326	0.00105317	0.0150666
Dsp	3.39485	3.75576	2.91361	2.82491	3.1393	5.06673	4.88267	4.86285	4.80725	4.1318	2.91718	0.00105499	0.0150748
Panx1	0	0.169316	3.17855	2.1328	2.49966	4.65462	3.79381	4.05905	5.07957	3.62063	6.25699	0.00105632	0.0150761
1810046K07Rik	0	6.18356	0	0	4.31254	5.65487	6.69623	6.96551	7.21732	7.02484	24.4631	0.00106202	0.0151397
Zfp9	3.15861	2.05213	0.714191	1.68094	2.05356	0	0	0.321234	0	0	0.274021	0.0010679	0.0152057
Sh3bgrl	7.78777	7.23931	7.94757	7.64395	7.09973	8.68936	8.90025	9.25213	9.15103	9.10466	2.78141	0.0010775	0.0153244
Tiam1	1.476	1.90757	2.8265	1.02148	1.24375	0	0	0	0	0	0.308842	0.0010811	0.0153577
Rtn4ip1	1.22547	0.169316	0.355387	1.02595	0.820125	1.73056	2.62108	1.90298	3.17561	2.88598	3.34961	0.00108933	0.0154565
Fpgs	3.64126	3.40383	3.70761	1.70468	2.78177	0.72631	1.71547	0.171301	1.74717	0	0.221323	0.00109119	0.0154649
Gramd1c	1.91735	0.169316	2.33405	3.18975	0	3.17561	5.18902	4.02421	4.18411	4.26538	6.25744	0.00109351	0.0154798
Larp1	3.45488	4.70414	3.69847	4.51914	4.29461	2.71686	2.45875	1.94915	3.03863	2.14623	0.313747	0.00109978	0.0155503
Htra2	4.4302	4.90835	3.2237	4.82233	3.32297	2.37041	2.38125	2.56328	0	1.56318	0.193998	0.00110147	0.0155561
Pcolce	3.65735	3.15226	5.31184	5.62424	7.06366	0	0	0	0	4.65726	0.0611961	0.00111171	0.0156728
Ppap2a	4.57936	0.169316	3.27016	2.74996	2.90753	5.0408	5.79577	6.24719	4.76248	6.09657	7.22649	0.00111315	0.0156728
Vasn	2.32724	3.30045	2.3809	3.3468	3.43708	2.30304	0	0	1.41867	0.320103	0.225292	0.00111591	0.0156728
Tor4a	2.73519	2.65839	2.73304	3.48442	3.40674	4.54061	5.65254	5.94741	3.68982	4.98602	3.88987	0.00111615	0.0156728
Pacsin3	2.8863	1.96892	2.76184	1.95415	2.32264	1.96526	0	0.274569	0	0	0.262283	0.00111618	0.0156728
Dap	9.15103	9.01275	8.36932	8.93147	9.10466	7.74848	6.35605	7.58642	7.34232	7.44473	0.325732	0.00111797	0.0156799
2010107G23Rik	3.08792	3.18129	2.62777	3.16609	2.52383	3.81919	4.4355	5.03007	4.26305	5.05889	3.03977	0.00112253	0.0157258
Crp	4.0675	3.91413	2.88733	4.73716	1.3956	0	0	0	2.62777	0	0.136333	0.00112765	0.0157793
Csnk1g1	5.06414	4.03395	3.87673	3.60704	4.33036	2.78597	1.95069	2.30006	1.71245	3.20652	0.288911	0.00113097	0.0158076
Prss23	3.60704	3.93393	6.70107	4.96271	6.3968	0	0	1.05756	3.01915	3.85237	0.0863001	0.00113478	0.0158426
Lrrtm3	0	0.169316	0	0	0	2.66456	3.23073	3.18129	0	3.19775	5.35544	0.00113753	0.0158494
Cryab	4.18549	0.169316	3.68196	4.49413	4.44036	0	0	0	0	1.41927	0.115792	0.00113981	0.0158494
Dmbt1	9.33454	9.97857	9.88733	9.88733	9.58711	7.33173	6.61557	4.85574	9.36597	4.37899	0.106922	0.00113987	0.0158494
St3gal6	2.58541	0.169316	1.65235	0.481	1.75965	2.34762	3.28177	4.80051	3.8051	4.72744	5.51341	0.00114048	0.0158494
Cela3b	12.4565	12.6292	10.8708	12.4565	11.851	10.0835	8.78592	5.75654	10.3149	4.50438	0.0557937	0.00114302	0.0158666
Hdac11	3.41493	4.75481	3.43949	3.82203	3.0021	3.0593	1.2832	1.56143	0	1.10846	0.2053	0.00115916	0.0160512
Dok2	1.03454	0.169316	0.238031	0	0.285754	1.37716	1.43972	3.04602	2.68452	2.18248	3.48329	0.00115969	0.0160512
Hist2h2aa2	5.53674	6.21808	4.95261	5.67086	5.6378	7.01823	7.5996	6.81076	7.40246	6.95055	2.93448	0.00116028	0.0160512
Cpne3	3.21291	4.97456	4.72168	4.1133	4.36226	6.4104	6.30202	5.50023	6.11108	5.76129	3.34049	0.00116307	0.016057
Ncoa7	1.00521	0.169316	0.276257	0.414199	0.100045	2.15638	2.032	1.91354	1.62202	1.59177	2.77048	0.00116334	0.016057
Vamp8	6.94207	7.33173	6.19126	6.53193	6.46468	8.51629	8.81158	7.91739	8.09118	7.99776	2.97833	0.00116695	0.0160671
Ung	1.70853	2.03384	2.49318	3.06102	1.9219	1.33295	0	0.632937	0.590411	0	0.300944	0.00116768	0.0160671
Tmem27	2.42779	0.169316	2.21181	2.84009	3.33526	0	0	0	0	0	0.218113	0.001169	0.0160671
Chn2	2.84401	3.27885	3.42469	2.89453	4.68571	4.21523	5.41511	5.76264	5.73401	5.87225	3.92935	0.00116936	0.0160671
Hsd17b11	1.29418	2.27122	3.71496	4.64727	2.75041	5.40428	5.0537	5.07957	5.75899	5.06012	5.04804	0.00117496	0.0161258
Cldn2	7.45787	7.25355	10.6402	8.26875	8.14098	6.129	5.9611	3.69755	5.90902	6.09954	0.144282	0.00119879	0.0164344
Bicc1	3.60239	2.7219	1.55834	3.23897	1.92879	1.15684	0.91178	0.135838	1.00762	0	0.255666	0.00120216	0.0164438
Gm8096	1.27431	2.19257	1.24593	1.50763	2.06757	0	0	0.159575	0.562936	0.0273201	0.351687	0.00120218	0.0164438
Rhbdf2	4.0802	2.11713	3.83527	4.1574	4.05686	1.96404	2.70032	1.00386	0.980551	0.779054	0.223166	0.00121212	0.0165371
Dctn1	2.64366	2.77734	2.10494	1.96526	2.22722	3.70648	3.69368	4.15628	3.57192	3.82822	2.7276	0.00121252	0.0165371
2019-09-11	4.74545	5.11553	5.01377	5.9141	3.63138	3.88275	1.93345	0.849482	3.18297	2.3688	0.184212	0.00121309	0.0165371
Rbm19	3.29887	4.14716	1.72295	3.30182	2.12868	1.14	1.33621	0	1.26081	0.100465	0.224938	0.00121528	0.0165485
S100g	6.65338	0.169316	8.65331	9.21166	9.39544	0	0	2.85667	0	1.2313	0.0156355	0.00122572	0.016672
Mcfd2	6.23101	6.48277	6.40793	6.72183	6.18639	4.64727	2.75115	4.2636	4.36696	5.74904	0.241421	0.00123173	0.0167233
A4galt	0	0.169316	0	0	4.41521	4.16702	2.7299	5.30761	4.79324	4.62678	10.6148	0.00123338	0.0167233
Hmmr	2.49742	3.85415	0.547269	3.62286	1.502	0	0	0	0	0	0.188843	0.00123362	0.0167233
Vat1	4.14654	6.8945	5.54486	5.2951	5.18438	3.9626	3.26373	3.12872	3.6805	2.09322	0.219559	0.00123517	0.0167257
Hist2h2aa1	4.14484	4.84175	3.51639	4.28427	4.25325	5.75974	6.23336	5.3666	6.07136	5.47295	2.97461	0.00123961	0.0167672
Il1rap	1.80918	3.76	1.84441	0.627193	2.25482	5.63319	3.76709	4.49117	3.6306	4.68909	5.21658	0.0012462	0.0168375
Col7a1	2.6619	3.5716	0.448745	2.71686	2.11956	0	0	0.118624	0.626204	0	0.224569	0.00124852	0.0168502
Rab26	2.38736	2.14241	0.671605	4.18088	2.36057	0	0	0.528077	0	0	0.211254	0.00125145	0.016871
Col4a1	2.53149	2.13856	0.381025	2.83499	2.64366	0	0	0	0.573621	0.094025	0.254826	0.00125747	0.0169333
Esam	1.77728	0.169316	3.41493	0	1.24046	3.28899	3.90903	4.97539	3.23185	4.13138	6.00819	0.00126262	0.0169839
Maml2	1.75692	1.55494	2.33482	2.82695	3.44838	0.555191	1.34796	0	0.557591	0	0.269386	0.00126716	0.0170146
Plxnb1	3.77411	3.88941	2.40791	3.30839	2.34607	1.29585	2.0386	1.11554	1.43696	0.260651	0.265051	0.0012677	0.0170146
Snord47	4.73978	4.18654	5.68783	4.90528	2.50443	0	1.18156	1.38057	3.28515	2.28003	0.145661	0.00127427	0.017084
Rmdn1	2.56476	0.169316	1.91078	0	4.42652	4.15043	5.41895	4.38146	5.17649	5.06673	8.13722	0.00128704	0.0172361
Dcxr	2.79564	3.6213	2.1028	3.02515	2.93791	4.57876	5.0708	4.42866	4.37501	4.0716	3.04915	0.00128922	0.0172463
Pdss2	0	0.169316	0.346067	0	1.7724	1.15088	3.19974	2.77872	2.50619	2.77094	4.06636	0.00130386	0.017423
Tti1	1.82337	0.169316	0.415051	1.55339	0	2.57744	2.34401	3.2426	2.17231	3.02462	3.68068	0.00131714	0.0175812
Reg3g	5.3162	4.81327	7.69479	8.64077	8.54465	0	4.00819	4.4702	4.50334	1.68773	0.0596206	0.00132193	0.0176229
Ccdc82	0.560349	1.64924	0.288842	1.61385	0	2.6127	3.4115	2.46602	2.43897	2.25866	3.51888	0.00132317	0.0176229
Cplx2	4.04211	3.19582	2.3466	1.35801	2.34215	1.10122	0.819525	0.805743	0	0.375065	0.243732	0.00132654	0.0176427
Tk1	3.65923	4.29461	0.513522	2.37241	2.68592	0	0	0	0.972229	0	0.175471	0.00132884	0.0176427
Bet1	6.45652	6.77566	5.68608	6.09263	6.09954	4.44122	4.71017	5.24232	4.20282	4.8368	0.344978	0.00132901	0.0176427
Mfn2	2.18967	0.169316	2.34215	3.17044	1.99626	4.8782	4.54597	4.07494	3.64088	3.64126	4.53996	0.00133833	0.0177471
Smco4	1.72089	2.73675	1.92011	3.0319	2.56754	1.17681	0.828185	0.327902	1.15684	0.296168	0.321244	0.00134627	0.0178291
Suox	2.37176	0.169316	5.06673	0.750093	3.54613	5.30131	5.13799	6.04136	6.40609	5.1979	9.4226	0.00134889	0.0178291
Bri3bp	5.73466	5.97656	3.68095	5.224	2.9896	1.74004	0	2.82026	3.29325	0.16017	0.11515	0.00134892	0.0178291
Echdc2	4.56252	5.38607	5.15093	5.39235	3.96112	2.2419	3.14936	3.58163	3.43913	3.33497	0.299121	0.00135094	0.0178366
Ctnnbip1	2.2013	1.81897	2.93578	3.9838	3.16524	5.11897	5.02635	4.48605	4.72744	4.08398	3.6491	0.00135744	0.0179029
Zfp703	2.8242	2.66305	3.26157	3.70579	1.78149	1.80756	1.24178	0.266676	1.13948	0.19878	0.264921	0.00137054	0.0180561
Kpna1	0	2.4183	1.72357	3.61364	1.81348	4.54202	4.81829	3.66019	5.2951	3.66704	5.58954	0.00137205	0.0180564
Apoc1	3.40634	2.29199	0.400389	3.88736	1.80587	0	0	0	0	0.0817876	0.197232	0.00137409	0.0180637
Npm3-ps1	2.29199	3.97717	2.89324	3.63471	3.15417	0.686369	1.64403	0.727439	2.44866	0.758174	0.261101	0.00137893	0.0180963
Cmtm8	2.97637	2.75041	4.03654	3.82822	3.30626	4.84175	5.05889	4.81524	5.14028	4.70004	2.89122	0.00137958	0.0180963
Akr1b10	0	0.169316	1.57985	2.6825	3.0685	4.00878	3.76151	5.66344	3.00521	5.17767	7.07774	0.00138112	0.0180963
Sqle	3.77697	0.169316	2.91018	2.72267	3.88941	5.8692	5.36148	5.74385	4.32547	5.33434	6.20383	0.00138252	0.0180963
Glud1	6.60588	6.33055	5.81694	5.71452	5.76773	5.15093	4.73109	4.09882	4.25066	4.32017	0.344652	0.00138555	0.0181165
Ascl2	4.55513	0.169316	4.18695	5.00182	4.45643	6.15793	7.04594	7.25355	6.58714	7.076	8.87768	0.00138959	0.0181498
Cacna2d2	0	0.169316	0.0752958	0	0.0691314	2.44597	2.30926	0.604324	1.65619	1.59506	3.15888	0.00139374	0.0181844
H2-D1	7.67965	7.3481	8.50712	8.24265	8.03068	9.15103	8.66275	10.9739	10.5962	10.8245	4.22818	0.00140278	0.0182828
Tmbim1	3.61796	4.17037	5.60108	3.30996	4.77112	6.23765	6.04482	7.49095	5.52769	6.72183	4.31837	0.00140678	0.0182959
Nrep	6.88039	5.6172	4.92289	5.09565	5.05889	7.13057	6.53093	9.02217	7.83415	7.91739	4.50659	0.00140679	0.0182959
Anxa1	0	0.169316	5.23709	0	6.04223	6.4631	6.40207	7.55468	6.27376	8.10565	25.4594	0.00141109	0.0183321
2310045N01Rik	1.73854	2.5204	3.8246	3.53357	3.35023	4.62935	5.05254	4.77845	4.57424	4.86285	3.44862	0.00141322	0.0183343
Abca1	2.65446	3.73715	3.44	3.75183	3.00791	5.0191	4.75559	4.96409	5.17351	4.32547	2.88641	0.00141427	0.0183343
Dctn3	4.42246	5.19879	3.90558	4.77599	4.91284	6.20274	6.2093	5.87048	6.33825	6.05197	2.81165	0.00141957	0.0183834
Rev3l	2.57744	4.14654	3.36821	4.10548	3.72766	2.77513	1.54673	1.09453	1.96723	1.42613	0.28261	0.00142805	0.0184735
Cpn1	3.24448	4.16776	5.9141	3.41938	4.36088	3.38023	1.8801	1.7608	0	0.685941	0.156051	0.00143657	0.0185639
Lin52	0.687894	2.27247	0.642793	1.23405	1.31428	2.23236	2.55918	3.49945	3.49994	3.28358	3.44524	0.0014559	0.0187938
Efhd1	4.24359	5.0334	2.54362	3.59032	0.339744	0	0	0	1.07316	0	0.130715	0.00146514	0.0188929
Podxl	2.19697	3.43451	1.66004	2.0315	0.675146	0	0	0	0	0.41275	0.264789	0.00146846	0.0189019
Gnat3	2.45727	0.169316	0	0	2.91451	3.11346	4.97732	3.78481	3.15	3.67205	6.19588	0.00146894	0.0189019
Arfgef3	1.46014	3.72836	1.54744	1.90045	1.19843	0	0	0	0	0.21272	0.263446	0.00147198	0.018921
Xpot	4.77994	4.13066	4.32226	4.42814	4.00819	3.26717	2.75695	2.72224	3.01791	2.97324	0.382536	0.00147372	0.0189233
Tsc22d4	2.98629	2.98219	3.42921	3.70935	3.69847	5.18356	4.42927	4.76852	4.81716	4.76248	2.69652	0.00147952	0.0189521
Ncl	7.51849	7.40815	6.9754	6.69623	7.19258	5.89546	5.58668	5.64705	6.04223	5.65487	0.380795	0.00148029	0.0189521
Mme	4.13103	2.78315	0.451893	2.99238	1.50241	0	0	0	0	0	0.193155	0.00148063	0.0189521
Tbc1d5	0.780471	1.61927	0	1.18	0.760967	2.88598	1.9407	2.38615	2.60963	2.57036	3.05341	0.00148366	0.018955
Prkag2	1.16028	0.169316	0.519458	1.2722	0.197709	2.05546	2.6559	2.02304	2.39045	1.90298	2.91152	0.00148398	0.018955
Ddah1	0	0.169316	0	0	0.46935	2.98872	1.35483	0.993149	2.00294	1.75537	3.22941	0.0014876	0.0189813
Sgce	3.32415	3.32718	3.76079	3.8973	4.29883	0	2.98155	0.318959	0.725515	2.63721	0.190914	0.00148931	0.0189832
Tubb4b	6.13374	5.37005	6.06279	6.50831	6.86679	7.16567	7.62287	8.16314	7.82678	8.34017	3.10671	0.00150196	0.0191198
1810009J06Rik	11.7892	11.7506	12.1362	12.5335	13.4395	9.08679	7.46502	8.28153	12.3162	5.80271	0.0748762	0.00150317	0.0191198
Abcb9	2.96032	2.89269	2.5804	0	2.27669	3.18253	4.34359	5.21113	4.9938	5.40428	5.59853	0.00151304	0.0192252
Rpl12	8.2152	8.29443	7.42944	8.06848	7.45787	7.242	6.1008	5.16107	6.43181	5.2951	0.277984	0.00151746	0.0192613
Napepld	2.72096	2.86208	3.69168	2.8331	2.83966	4.32852	4.18088	4.30523	4.56252	4.69054	2.68336	0.00152134	0.0192882
Gas6	3.41077	3.53821	4.70004	4.97539	4.56855	2.24532	1.03189	1.36401	3.10144	3.0151	0.235363	0.00152275	0.0192882
Kcnk5	2.41983	3.18355	0.383713	1.45467	2.47693	0	0	0	0	0	0.252834	0.0015252	0.0192992
Mogs	4.69054	4.41235	3.50763	4.86888	4.50209	2.37791	3.14225	2.36574	3.51243	2.14902	0.310609	0.00153152	0.0193429
Cdo1	5.32043	4.99677	7.05376	6.05578	5.248	2.78732	0	3.87374	1.43924	4.75342	0.111553	0.00153184	0.0193429
Fign	2.83925	2.50501	1.25851	3.13451	1.79248	0.593102	1.33984	0.246788	0	0.237328	0.282723	0.00153523	0.0193655
Nadk2	4.10297	4.0802	3.58498	4.69254	2.51241	0	1.3535	2.04047	2.52661	2.07239	0.218238	0.00154597	0.0194809
Wfdc2	6.02436	5.62352	5.48685	6.98184	5.10172	3.15311	2.35364	1.14452	5.80393	1.3852	0.11862	0.00155577	0.019584
Ptgr2	2.3933	4.25502	3.4459	3.19974	2.28943	4.56855	5.08917	5.36418	4.45886	5.00003	3.43303	0.00156725	0.0196928
Shmt1	2.17431	0.169316	1.99925	2.91421	2.40769	0	0	0	0	0	0.261892	0.00156765	0.0196928
Cars	2.85151	3.17283	2.91666	4.24696	3.91121	2.33781	1.38928	1.20907	1.26185	2.26355	0.301969	0.00157517	0.0197628
Rhpn2	3.28422	2.73304	3.3265	4.08987	3.17326	2.60334	1.23405	1.4257	1.22286	1.8452	0.317505	0.00157648	0.0197628
Cbr3	3.08502	0.169316	3.26595	0.955127	5.04714	5.41179	5.33585	6.02561	5.18516	5.71161	8.16523	0.00159484	0.0199724
Tstd1	5.52879	6.30753	4.34956	6.11853	3.66464	3.47255	3.52158	0	2.92629	1.11099	0.126085	0.00160041	0.0200199
Evc	2.66832	2.77094	0.433984	3.71779	1.37847	0	0	0	0	0	0.21856	0.00160199	0.0200199
Lmnb2	2.0141	2.34495	1.08232	0	1.91677	3.81786	2.60115	3.7314	4.05905	3.15344	4.00264	0.00160357	0.0200199
Zfp52	0.503319	0.169316	0.375761	1.68708	0	1.81874	1.62655	2.55794	3.6259	2.7032	3.78258	0.00160928	0.0200705
Ppp3ca	5.75654	6.70396	5.04779	4.58694	4.6406	7.83072	7.19258	6.70396	7.23931	7.06103	3.62593	0.00161991	0.0201825
Eif2ak3	3.89085	3.73599	3.25976	3.09272	3.68653	2.81686	2.05356	1.6211	1.82103	0.59726	0.297053	0.00162252	0.0201944
Ubtd1	0.867129	0.169316	0.0942353	0.771953	2.6215	2.14241	2.99349	3.47115	2.7823	3.27016	4.07578	0.00162937	0.0202589
Ap4s1	3.06462	2.52661	0.290699	0	3.57192	4.55955	4.90167	4.50025	4.21421	4.39138	6.15877	0.0016315	0.0202646
Paics	6.59387	7.12369	6.67665	6.57679	7.08155	3.4075	5.3635	4.97293	5.56755	5.59545	0.281435	0.00163695	0.0203115
Tinag	0	4.11947	2.90753	2.33215	4.02652	0	0	0.19196	0	0	0.160568	0.00167035	0.0207049
Igsf8	2.67129	2.13825	2.66305	2.48787	2.7851	3.6051	3.79315	4.04268	4.2321	3.83479	2.55346	0.00167319	0.0207189
Fam229b	4.78545	0.169316	4.24793	5.34163	1.83672	0	0	0	0	0	0.10322	0.00167703	0.0207454
2510002D24Rik	4.70643	5.07866	4.56917	5.3997	4.56171	6.64825	6.73768	6.23915	5.90584	6.03598	2.73255	0.00168955	0.0208782
Trip6	3.27415	4.06568	3.71872	4.26305	4.30523	2.30688	0	2.47921	2.86953	0	0.190222	0.00169121	0.0208782
Calm1	7.96534	7.97895	7.4252	7.38949	7.59376	9.64514	9.44643	8.7225	8.77482	8.95954	2.71159	0.00169323	0.020882
Mbd3	4.43478	4.54541	3.16714	3.10498	3.97227	2.44924	1.63533	2.20273	2.38778	2.36057	0.321349	0.00169692	0.0209042
Gjb1	4.76066	3.77226	4.04518	5.38148	4.65174	0.613491	2.75557	3.0915	1.95996	3.37073	0.223135	0.00169846	0.0209042
Ptpre	0	2.74546	0.0656974	0.977863	0	3.31593	3.25367	2.45492	3.301	2.32436	4.50702	0.00170515	0.0209545
Slc40a1	2.86511	1.59385	1.75315	1.59238	2.91666	0	0	0	1.51696	0.0850839	0.282472	0.001706	0.0209545
Tns1	2.35688	3.38197	1.25101	3.15681	1.40357	0.640721	0	0.347671	0.926018	0.0371998	0.264305	0.00171408	0.0210325
Myl6	8.62991	8.15894	7.7786	8.48395	7.99261	10.8708	10.2791	9.22253	9.52942	9.39544	3.13977	0.00172275	0.0211176
4933421O10Rik	0.449612	0.169316	0.27094	1.18258	0.0759487	2.1328	2.60373	1.61291	2.0605	1.42231	2.90144	0.00172489	0.0211194
Ppy	7.14622	2.75334	4.28792	0.95373	9.76325	0	0	0	0	0	0.0316666	0.00172704	0.0211194
Hacd3	4.89509	4.93593	4.92449	5.00844	5.66344	6.29501	6.98184	6.61557	5.98923	6.73184	2.70799	0.00172811	0.0211194
Gsta3	6.20768	5.71551	6.129	6.60364	4.73844	4.23907	4.07538	1.60785	4.68228	1.39374	0.156129	0.00172984	0.0211194
Lgr5	1.94294	4.25864	4.54825	2.7701	0.219456	6.02033	5.81844	5.062	5.15633	5.67627	6.95859	0.00173544	0.0211664
H2afz	8.01435	7.7462	8.02486	8.17577	7.94374	5.50856	6.61022	6.66464	6.9532	6.71315	0.355758	0.00174443	0.0212548
Zfp597	0	0.169316	0.314348	1.48927	0	1.83963	1.72023	2.48587	2.15975	1.70781	3.00647	0.00175832	0.0214025
2700094K13Rik	6.63747	5.33585	6.78386	6.11294	5.37005	3.75866	5.23709	4.12287	4.51443	3.36002	0.277504	0.00176848	0.0215047
Snw1	4.88963	3.34256	3.43675	3.26756	4.76128	5.71679	5.49243	6.23765	5.3949	5.54164	3.3337	0.00177335	0.0215276
Fmo2	4.28792	2.81122	3.27227	3.98689	0	0	0	0.846541	0	0	0.153642	0.0017739	0.0215276
Nr2f6	2.92886	3.67487	3.55557	3.57921	3.09894	2.33447	2.32861	1.04649	2.02745	0.962289	0.32362	0.00178181	0.021602
Tnnt1	0	0.169316	0.310464	0	0	2.72823	3.11461	3.18975	0	2.45385	4.59904	0.00180065	0.0218087
Mon2	3.39754	2.9196	4.79699	3.46945	2.81283	1.7945	1.68708	0.872559	1.89005	2.21987	0.28988	0.00181496	0.0219601
Gm6251	5.8768	6.24103	5.30631	6.14936	5.37135	4.67531	4.25363	3.6259	4.81879	3.78665	0.339878	0.00182045	0.0220047
Abhd1	2.17656	0.169316	1.75577	0	0	0.801559	3.88029	4.96633	6.00629	5.43683	10.5409	0.00183412	0.0221479
Ankrd22	0.490232	0.169316	0	0	1.15385	0.656021	2.69628	2.60159	2.37041	2.80684	3.63902	0.00183602	0.0221489
Doc2a	0.54187	0.169316	0.440985	0	0	1.74717	0.947208	1.75577	2.38391	1.65817	2.7664	0.00184152	0.0221865
2010107E04Rik	8.89132	8.59881	8.57411	8.81755	8.60677	10.8245	10.5962	9.44643	10.0835	9.88733	2.76996	0.00184379	0.0221865
Degs1	7.84388	8.16314	9.52942	8.5234	8.39398	7.80967	4.00081	5.77338	4.56492	7.01466	0.158431	0.00184462	0.0221865
Rian	3.11907	2.30446	1.5403	3.62937	2.16395	0.846541	1.61598	0	0	0.73102	0.265591	0.00184665	0.022189
Fam84b	4.81879	6.03989	5.08297	5.33147	5.43523	3.81441	3.50033	3.96314	4.48348	2.81066	0.323701	0.00184987	0.0222058
Mob1a	0	0.169316	1.33034	0.888407	0	1.4732	1.85131	3.29864	1.98134	2.79898	3.48965	0.00186296	0.0223318
Dscaml1	0	0.169316	0	0	0	1.3956	1.5403	1.37614	2.78809	0.924694	2.97132	0.00186404	0.0223318
Actb	7.93363	7.95512	9.05178	8.74206	9.26614	9.91496	9.88733	10.5962	9.84836	10.9739	3.14795	0.00187463	0.0224366
Penk	2.64397	7.67965	8.60677	7.73452	6.27978	0	1.8931	3.54555	3.08922	4.0434	0.0593468	0.00188491	0.0225374
Mat1a	3.26084	2.38391	0	2.24818	3.37031	0	0	0.151827	0	0	0.214302	0.00189392	0.0226229
Cbx6	2.30153	2.47816	1.25416	3.12872	1.33649	0.955127	0	0.233348	0.54187	0.143634	0.302495	0.00190223	0.0226794
Saal1	1.5718	2.556	2.48004	1.96463	2.11747	0	0	1.51525	0	0.909678	0.317978	0.0019028	0.0226794
Ctgf	4.87892	6.05393	6.64825	3.26287	4.36308	4.03833	3.40951	0	0	0	0.0852686	0.00190425	0.0226794
Tmem229a	5.733	3.02945	2.87577	4.43663	2.46144	6.98184	6.26537	5.63319	5.84136	5.55636	5.09248	0.00194443	0.0231353
1110065P20Rik	5.84136	5.72936	4.70349	5.4762	4.67531	4.16986	4.09614	3.78305	2.85363	3.38733	0.323729	0.00194884	0.0231651
Grtp1	3.3712	1.93582	3.71567	0	2.32215	3.96851	5.34961	4.43996	4.73109	5.07593	5.44168	0.00195461	0.0231682
Baz1a	0	2.52195	1.5767	2.09969	1.91568	4.34781	4.40201	2.36283	4.34424	3.46767	4.47568	0.00195503	0.0231682
Rai2	0.837808	2.39448	3.23702	0.776449	2.24252	0	0	0	0	0	0.268379	0.00195696	0.0231682
Ergic2	4.4355	5.82496	4.50025	3.97717	4.40111	2.56993	3.35091	2.38391	3.06565	3.39446	0.313204	0.00196003	0.0231682
Pde4b	1.34025	3.15552	2.24496	0.825969	1.40438	0	0	0.175611	0	0.0382974	0.297007	0.00196189	0.0231682
Deptor	5.83335	5.18997	5.63656	5.08519	5.3101	2.79459	4.18835	3.94228	3.40532	4.62183	0.325209	0.001962	0.0231682
Arl4c	3.25303	2.30955	2.15055	2.30955	0.538299	0.993543	0	0	0	0.0236352	0.266322	0.00196243	0.0231682
Gm15421	5.32725	5.67086	4.79844	5.41895	4.83499	4.56723	3.60298	2.98418	3.84269	3.14288	0.333994	0.00199044	0.023476
Agap1	2.66456	2.84105	2.25442	2.48962	2.47653	4.57468	4.65726	3.42778	4.34872	3.35023	2.88086	0.00202477	0.02385
A330023F24Rik	0.956484	0.169316	2.88547	0.408008	0	4.28098	4.24021	2.44222	2.71482	2.55307	5.14227	0.00202681	0.02385
Gdi1	4.13574	2.74319	4.39536	3.29541	4.50076	4.70067	5.49077	5.72417	5.78535	6.22186	3.41166	0.00202803	0.02385
Cgn	1.81874	3.06492	2.07563	3.41555	3.44	3.64231	4.30268	5.39783	4.62373	5.10344	3.60758	0.00203196	0.0238587
Ten1	1.74813	0.169316	1.78802	1.51389	2.51668	3.22953	3.31277	3.29738	3.50851	2.9306	3.26832	0.00203421	0.0238587
Sh2d4a	3.59844	3.66904	4.27044	4.53841	3.45003	0	0	1.17329	3.74615	2.00253	0.174237	0.0020365	0.0238587
Ndufaf4	6.55441	5.86566	5.05439	4.82861	5.28298	4.26192	3.47047	4.14085	3.99707	3.67895	0.328199	0.00203662	0.0238587
Pcca	2.55263	4.0495	1.78254	2.99112	2.50818	1.07316	0	0.971417	1.3421	1.37567	0.282373	0.00204458	0.0239079
Mia2	0.515389	0.169316	0.00895235	1.03996	0	2.77213	2.84997	2.04953	0.976272	1.69049	3.29654	0.00204476	0.0239079
Rad51	1.10258	1.87344	0.573621	1.94601	2.54161	0	0	0	0	0	0.328177	0.00204874	0.0239315
P2rx4	2.79513	2.53589	4.04455	3.60998	4.79974	5.3647	5.16262	5.4425	5.31184	5.25803	3.36564	0.00205098	0.0239347
Trib3	2.46474	3.88316	2.28943	2.62412	0	0	0	0	0	0	0.209891	0.00205596	0.0239697
Wfdc3	5.58796	0.169316	3.09405	4.52069	2.07079	0	0	0	0	0	0.117558	0.00206118	0.0240076
Txndc5	4.50549	4.47734	5.53859	4.0559	4.36833	1.64201	2.8863	3.35653	0	3.19001	0.192888	0.00206966	0.0240834
Fut8	2.47098	1.69995	2.92054	1.476	2.11281	3.89333	3.59557	3.44172	3.63636	3.47875	2.77616	0.00207641	0.0241388
Nptn	4.13378	3.81786	5.45378	5.23971	5.41242	6.32447	6.09486	6.67068	6.47611	6.6949	3.11816	0.00209078	0.0242826
Grcc10	3.84925	4.80806	3.67895	4.35706	3.52488	5.99577	5.97084	5.03642	5.78798	5.14775	2.91624	0.00209814	0.0243218
Erp44	5.20144	4.803	6.12201	6.31974	6.18755	2.99238	2.84317	4.36787	2.75244	5.16054	0.232698	0.00209816	0.0243218
Prkra	2.09322	0.169316	0.0724711	1.24944	1.62655	1.93707	3.31533	3.03316	3.36994	2.94109	3.6734	0.00210841	0.0244174
Sec61b	6.9577	6.82463	5.85289	6.5618	6.26537	5.64019	5.16365	4.65462	5.0404	4.59549	0.36008	0.0021196	0.0245034
Tjp3	2.09394	0.169316	3.14936	3.14878	3.93193	4.6526	4.50076	5.40979	4.7705	4.88582	5.08141	0.00212094	0.0245034
Pdia5	3.12239	2.10426	3.38578	1.778	3.593	1.57821	0.901013	0.861682	0	1.47279	0.280496	0.00212188	0.0245034
B3gnt9	1.51876	1.46948	2.03715	0.972909	2.37705	0	0.837808	0	0	0	0.351718	0.00213037	0.0245265
Stbd1	1.62443	0.169316	2.99647	3.02945	4.23042	0	0	0	0	0	0.188154	0.00213118	0.0245265
Plxna4	0	0.169316	0	1.34423	0	1.81626	1.83548	2.35822	2.35219	1.14203	3.02751	0.00213168	0.0245265
Misp	2.4732	0.169316	2.88349	1.30669	1.45054	3.68145	2.71719	4.00297	4.39486	3.74453	4.14552	0.00213195	0.0245265
Mal2	5.64326	5.8	5.90093	6.11573	5.30761	5.52266	3.32297	4.00379	2.75557	3.70088	0.269372	0.00213425	0.0245297
Kctd20	1.51936	0.169316	1.79706	1.37385	2.19697	2.27867	3.04647	3.54861	3.31085	3.58405	3.34595	0.00213794	0.0245489
Tm4sf1	5.91319	0.169316	4.4355	6.17466	4.23502	0	0	0	2.36685	0	0.0763003	0.00214367	0.0245901
Padi2	2.35321	3.30996	0.944893	3.25125	2.3466	1.0831	1.21503	0.211396	0	0	0.260746	0.00214581	0.0245901
Sfxn4	0	0.169316	0.0822998	0	0	3.02542	0	2.26046	3.35429	2.28055	4.38878	0.00214798	0.0245901
Flrt2	2.00536	2.07926	2.81939	0.457595	2.0764	0	0	0	0	0.745783	0.299693	0.00215015	0.0245901
Errfi1	4.66523	5.2977	6.18639	5.51222	5.3997	3.0073	3.03615	3.96606	4.61852	3.97272	0.309476	0.00215163	0.0245901
Pik3r3	2.63361	1.52185	2.10859	0	1.66397	3.42087	3.92602	3.55873	3.09894	3.16444	3.60049	0.00215941	0.0246558
Arhgap18	1.78841	3.13516	4.34872	4.27552	0.73744	5.36253	5.52266	5.83335	4.56979	5.55369	5.70155	0.00216573	0.0247048
Rtn4rl1	1.93582	2.26509	2.19697	1.4624	0	3.24093	3.3487	4.17301	3.07003	3.21291	3.57282	0.00216863	0.0247146
Ssx2ip	4.23421	4.27044	2.75173	4.4034	4.18549	5.57918	5.61411	5.65563	6.05393	4.97692	3.04596	0.00217601	0.0247617
Fjx1	1.28152	2.09008	2.32116	2.84758	1.73155	1.27555	0.756191	0	0	0	0.319076	0.00217683	0.0247617
Mkrn2os	0	1.68752	2.00808	2.60729	2.23399	3.24534	3.19686	4.13138	3.96749	3.49864	3.73359	0.00218621	0.0248451
Fgfr4	2.84009	2.84709	2.97358	4.11639	2.29956	0.780471	2.42851	1.03363	1.22051	0.840725	0.296361	0.00219355	0.0248984
Spdya	0	0.169316	1.71623	0	2.03447	4.1318	2.46645	2.978	1.82004	3.23348	4.41359	0.00219499	0.0248984
Calu	4.76724	4.59131	5.70824	4.25801	5.28744	3.36535	3.85834	3.64231	2.54879	3.28619	0.33396	0.00220299	0.0249658
Igtp	0	0.169316	0.067758	0	0.0894446	2.63884	0	2.50402	2.34307	3.61595	4.45391	0.00220656	0.024983
Fabp1	2.31011	1.6822	0	3.04746	0	5.78424	6.94814	2.56476	8.71432	3.24413	16.4859	0.00221996	0.0251114
Cyb5a	6.38537	5.82784	5.61298	6.08191	5.67192	7.48314	7.1394	7.22254	6.90247	7.46502	2.50795	0.00222332	0.0251214
Krtcap3	6.29901	6.53579	6.82679	6.15793	6.35789	7.61567	7.5728	7.69898	7.61567	8.33163	2.51658	0.00222498	0.0251214
Pvr	0.635999	2.94653	3.81988	2.36978	1.83425	0	0	0	1.10475	0	0.233204	0.00224854	0.0253639
Ephx1	3.70579	6.08091	5.34236	6.02968	5.73209	2.97969	0	1.85938	5.14512	1.31564	0.115167	0.00226818	0.0255617
Slc4a7	2.52806	1.92052	4.4201	4.76608	4.40984	6.53093	5.58495	5.54073	5.58369	5.6378	4.48995	0.00227715	0.025639
Ano6	4.40627	5.27831	4.2994	2.87891	4.66383	6.6991	5.9336	5.52495	6.44013	5.89301	3.46491	0.00228157	0.025665
Map3k1	3.9784	3.25677	3.46799	5.14954	4.48935	1.75761	1.96088	1.05548	3.30236	2.56898	0.260734	0.0022968	0.0258125
Lonp1	4.07538	3.42045	3.588	3.34202	4.40151	0.891751	2.1728	2.7701	0.715747	2.79849	0.268744	0.00230162	0.0258428
Hdlbp	5.54486	5.61554	5.50934	4.97069	5.48913	4.33307	3.93823	4.20861	4.25363	4.01765	0.413032	0.00230594	0.0258674
Chpt1	3.11005	2.91763	1.72089	3.0727	2.23154	1.78618	0	0.919759	0.584706	1.24733	0.307153	0.00231924	0.0259926
Acp6	2.61924	1.96604	3.03781	0.932646	0.734688	3.10808	3.32766	4.18494	4.13066	4.19557	3.81398	0.00232155	0.0259945
Smim24	3.11762	0.169316	0	2.65001	3.18297	3.31197	4.34717	4.64556	5.28298	4.58363	6.10622	0.00233219	0.0260896
Nmrk1	4.41777	2.94005	0	0.887926	0.387334	3.57657	4.6526	5.19423	4.48845	5.20791	7.45048	0.00233924	0.0261444
Cyp4f15	2.38615	0.169316	2.44924	1.46625	2.38804	0	0	0	0	0	0.292843	0.00234247	0.0261565
Cxadr	6.80791	6.69158	7.96997	7.83072	6.91908	5.21529	5.94473	5.39703	6.29666	5.58369	0.340005	0.00234504	0.0261611
Ascl1	2.13561	0.169316	3.71709	0	0	4.69054	3.73435	4.95048	2.33299	4.77672	7.42613	0.00235095	0.0261968
Enpep	3.12348	3.48914	0	4.50635	1.81392	0	0	0	0	0	0.16648	0.00235255	0.0261968
Gm2a	1.56772	3.90094	3.51565	3.09988	2.87993	0.931613	2.14824	0.247708	1.3833	0.494426	0.258499	0.00235714	0.0262204
Pigc	1.61982	2.99647	3.49411	2.27748	3.69566	3.81318	4.82128	4.95606	4.36787	5.10407	3.47204	0.00235897	0.0262204
Ldha	8.07867	6.9577	8.42124	8.12182	8.70112	8.7093	10.0835	12.3162	9.76325	12.1362	5.83842	0.00236222	0.0262325
Ddhd2	3.74056	1.91005	3.42417	2.97548	4.59071	4.83594	5.37781	5.31561	4.8439	5.30492	3.50021	0.00237849	0.026389
Ssfa2	2.83205	4.17841	2.80101	3.5716	2.96459	2.556	1.50241	1.41531	1.45978	1.56563	0.336877	0.00238401	0.0264262
Aspm	6.17789	4.37324	4.54254	1.95649	0	0	0	0	0	0	0.0940758	0.00239958	0.0265745
Dag1	6.03989	5.70532	6.13225	6.13602	5.52619	4.93265	4.4532	4.36833	4.9289	4.20908	0.397905	0.00241192	0.0266869
Ezh2	3.24472	4.50025	3.20742	2.24914	3.85329	3.02945	1.09144	1.03131	1.05861	0.187283	0.228245	0.00241714	0.0267203
Pml	2.50272	0.169316	0.147364	2.2213	2.96342	4.13766	4.3879	3.51322	3.12278	4.01669	4.70706	0.00242159	0.0267452
Nod1	0	2.75557	3.39007	2.51038	2.14569	0	0	0	0	0.371961	0.235541	0.00242552	0.0267644
Stk38l	0.584706	3.47973	0.338938	1.0196	1.52185	3.19899	2.99472	4.25502	3.3771	3.81653	4.40612	0.0024325	0.0268033
Dfna5	0	0.169316	0	0	0	1.662	0	3.44306	3.67098	3.28107	5.19657	0.00243345	0.0268033
Pcsk1n	2.36574	1.92827	3.64465	0	3.81258	0	0	0	0	0	0.196113	0.00244016	0.0268528
Timp2	5.60896	5.70684	4.95105	6.00466	5.77472	4.90528	4.20207	3.02333	2.2555	4.14996	0.267569	0.00244314	0.0268613
Tff2	9.03699	9.6887	12.0417	9.64514	8.11506	5.15346	6.93631	5.25688	6.28284	9.24005	0.114102	0.00244743	0.0268842
Zmynd8	2.70283	2.85121	1.75035	1.43116	2.2619	4.14996	3.84415	3.35118	3.6484	3.48353	2.82051	0.00245378	0.0269295
Eef1g	7.4106	7.66421	7.80406	8.01435	7.94757	6.25543	6.3367	6.79361	6.55441	6.55265	0.414775	0.00246218	0.0269973
Capn6	2.31084	0.169316	4.34268	3.36053	3.40383	0	0	1.11791	0	0	0.177531	0.00246877	0.0270314
Hspb8	3.73599	6.3327	5.87381	5.6534	5.66026	3.78386	0	1.01114	4.72052	2.28783	0.117395	0.00246972	0.0270314
Me3	2.00253	2.73076	3.85415	1.64201	0.283317	0	0	0	0	0	0.232846	0.00248128	0.0271334
Tmem214	6.26001	6.26333	6.71576	6.04482	6.67068	3.48353	3.13085	4.59935	5.64705	5.42386	0.261704	0.00249428	0.0272223
Ercc3	2.54362	2.66917	2.77969	0	1.48398	4.0559	3.5015	3.50033	5.25557	3.98208	4.48088	0.00249529	0.0272223
Ctrl	11.9208	12.2213	10.9739	11.6618	11.5667	8.98129	8.99244	1.31428	9.67338	3.26084	0.0267473	0.00249929	0.0272223
Tmem246	0.454324	0.169316	3.47875	2.36214	1.92827	3.49909	3.09894	4.79324	4.24741	4.46437	5.07023	0.0025002	0.0272223
Mbd2	7.1775	5.68783	5.53923	6.85826	5.78207	4.07061	5.41302	3.89459	4.87936	3.76436	0.286263	0.0025006	0.0272223
Kifc3	5.34961	4.40151	3.64036	4.96633	2.50771	2.34215	2.0764	0.480091	3.14065	0	0.16896	0.00250315	0.0272257
2210010C04Rik	11.9588	11.851	8.56576	10.8708	10.5962	9.22253	7.7737	6.17102	8.62252	3.37646	0.0750886	0.00252401	0.0274101
Gemin6	5.80213	4.22798	4.72555	4.29598	4.65836	2.73626	2.43292	3.84213	0	2.88393	0.194393	0.00252462	0.0274101
D630039A03Rik	2.4513	4.74674	4.12749	2.16716	4.02251	1.21627	0.885756	0.147364	1.67625	2.51192	0.215308	0.00254146	0.0275508
Strbp	4.79974	4.95745	3.36488	3.43775	2.78683	6.22568	5.88029	5.50189	5.88734	4.99965	3.55449	0.00254211	0.0275508
Igsf11	1.67625	0.169316	3.29375	3.17283	2.18193	0	0	0.252949	0	0	0.241781	0.0025488	0.0275988
Gm15708	0	0.169316	0.0219922	0.545236	2.73561	3.29117	1.82103	2.92681	2.45443	3.99469	4.60499	0.00256358	0.0277341
Srp72	6.04136	6.17319	5.9336	6.20423	6.35304	5.36067	5.24135	4.47734	4.24939	4.51692	0.386369	0.00256747	0.0277515
Elf4	0	1.62202	0.143634	1.6	1.13331	3.04975	2.94688	2.50272	1.6332	3.23813	3.42082	0.00257652	0.0278246
Sgk1	4.47734	3.46767	1.32032	0.90628	2.58094	0.721066	0	0	0	0.502136	0.202239	0.00259061	0.0279519
Ripk1	3.38297	1.95356	2.08759	1.60482	2.50004	4.2767	4.6977	4.58992	3.12197	3.5127	3.3265	0.00259376	0.0279611
Smim22	5.88029	6.76375	6.19283	6.70396	5.88734	8.7225	8.10565	7.16823	8.3744	7.12369	3.05943	0.00259699	0.0279667
Racgap1	2.44543	1.88508	0.145646	3.99418	2.27071	0	0	0	0	0	0.225592	0.00259888	0.0279667
Ltbp3	2.75695	5.08297	2.64008	2.89765	4.26138	3.11848	0	0.646017	1.38928	0	0.177138	0.00263805	0.0283632
Pdlim1	3.22916	4.34479	4.57609	5.31311	5.10261	0	3.67779	1.40203	3.46417	0.355387	0.150384	0.00264253	0.0283861
2010300C02Rik	1.55418	2.7195	2.02899	3.31593	2.12805	1.5718	0	0.316012	0.669201	0.853041	0.314838	0.00265009	0.0284423
Pold2	3.92948	6.99906	5.16054	3.38762	5.5662	2.23854	4.16583	0	0	2.64249	0.108879	0.00265535	0.0284736
St6galnac2	4.31562	2.21324	4.41521	2.17431	4.43816	5.23058	5.27532	5.69437	5.52266	5.73954	3.94818	0.00265792	0.028476
Cfb	0	3.45784	1.06169	0.706678	5.24526	4.7654	4.09492	5.95106	6.08798	5.97332	9.71519	0.00267531	0.0286371
Ppa1	5.10487	4.79103	6.18982	5.59486	6.16781	0	3.96454	3.58978	3.3688	3.92259	0.164877	0.00268083	0.0286673
Cldn7	5.51306	5.79181	5.62138	6.84595	5.71452	6.88385	6.78849	8.01032	7.98627	7.69479	2.98018	0.00268284	0.0286673
Gadd45a	0	4.2797	2.82829	3.39446	3.40267	4.7679	5.89668	4.65543	5.32807	6.08455	5.91962	0.00268823	0.0286877
BC017158	2.68452	3.06023	4.20547	4.16427	3.71097	0	0	2.16811	1.38454	2.99411	0.209389	0.00268947	0.0286877
Fbln2	1.60857	2.83499	0.146935	1.99305	3.16981	0	0	0	0	0.063943	0.261	0.00269465	0.0287178
Clcf1	1.56143	2.21826	2.20694	5.24135	3.98542	1.13591	0	1.58297	0	0	0.176911	0.00269784	0.0287265
Vash2	0	0.169316	0	1.27707	2.37635	3.74056	2.97154	3.84155	4.14287	1.10305	5.26112	0.00271158	0.0288476
Etaa1os	0	0.169316	0	0	0	3.57876	3.57235	1.20529	2.45065	0.353059	4.58893	0.00272963	0.0289924
Pbx3	3.02515	1.90325	1.67735	3.8309	2.91887	1.553	0	0.268149	1.68708	0	0.255349	0.00273367	0.0289924
Chgb	7.50006	4.51079	6.62157	0	6.44908	3.01665	0	0	0	0	0.0469423	0.00273395	0.0289924
Hsd17b7	3.916	0.169316	0.696746	1.04719	0	3.44838	4.47442	3.51127	3.71448	3.01709	5.52999	0.00273473	0.0289924
Ahcyl2	3.75229	5.02444	4.72744	5.12128	2.46602	6.11108	6.03377	6.02436	6.3367	5.95568	3.66554	0.00273803	0.0290022
Igfbpl1	2.34363	0.169316	0	0	4.22575	3.85675	4.00122	4.81327	4.2596	3.64909	6.81279	0.00274391	0.0290391
Grk6	0.999566	2.42214	0.456061	1.44158	0.300698	2.7055	3.74994	2.34551	3.46212	2.40932	3.50757	0.00274864	0.0290639
Ccdc126	1.63683	2.12179	2.89841	1.58297	2.30446	4.29461	2.60159	4.39605	3.60239	3.916	3.14538	0.00276472	0.0292085
Trim46	3.03548	4.02181	0.396495	4.05038	4.46165	5.03515	6.18535	5.35135	5.73141	6.27082	5.74239	0.00277032	0.0292308
Ndufaf3	3.43588	2.44222	1.90101	3.52861	3.36303	4.04366	5.18319	4.28663	4.54202	4.61462	3.03116	0.00277164	0.0292308
Plekha1	2.75094	2.15298	3.29811	3.62317	2.08595	1.42526	1.25678	1.60482	1.27973	0.649768	0.344133	0.00278246	0.0293195
Pot1a	3.16714	0.169316	3.068	1.49269	3.04827	3.70308	4.34095	4.56458	4.24901	4.7578	4.38933	0.00279329	0.0294081
Rilpl2	2.11956	0.169316	2.07005	2.12235	2.069	2.51785	3.36217	3.88626	3.96146	3.75827	3.45132	0.00280004	0.0294323
Sh3kbp1	0.495041	2.28158	1.25362	1.35877	0.373139	2.55889	2.54825	2.7924	2.53426	3.28196	3.012	0.00280043	0.0294323
Pola1	4.50909	4.16472	3.54368	1.14203	4.17431	3.26119	0	0.157912	0	0.117152	0.143635	0.00281028	0.0294961
Il1rn	6.28935	0.169316	6.15909	7.10317	6.36339	0	0	0	3.88364	0	0.0460665	0.00281135	0.0294961
Fam69a	0	2.90034	2.46645	2.81939	2.36685	0	0	0.672785	0	0	0.254185	0.00283214	0.029676
Ifi27	7.42944	7.03065	7.24645	6.69316	7.27367	7.7462	8.61519	8.36433	8.8508	9.05178	2.62258	0.00283338	0.029676
Ctsz	5.5474	5.13724	5.35499	5.83955	5.49451	3.92602	2.22676	4.33384	0	3.86472	0.164428	0.00285328	0.0298587
Ugt2b35	4.29028	2.91549	3.36596	2.49162	1.92011	0.837808	2.17656	0	1.64659	0	0.239069	0.00286345	0.0299395
Kit	3.63383	3.29929	2.22207	1.69137	1.32729	3.36104	5.41179	4.68571	3.95249	4.86033	4.05443	0.00286711	0.0299519
Cnn3	3.96851	3.40874	4.2636	4.44036	4.98685	5.35875	5.5843	6.09657	5.46781	5.74614	2.70776	0.00288341	0.0300963
Nrip1	1.79629	3.17717	1.36136	1.75228	2.13217	1.31387	0	0.661784	0	0	0.318923	0.00288663	0.0301041
Tmprss7	0	0.169316	0	0	0	2.27122	2.42921	1.83029	0	2.80273	3.56234	0.00290024	0.0302154
Tigar	1.18397	3.16844	2.54626	1.97097	0.478743	0	0	0	0	0.312665	0.285756	0.00290227	0.0302154
2310022B05Rik	4.20163	2.82351	2.17596	1.5718	2.09257	1.59177	0	0.424598	0.734688	0.621534	0.268208	0.00290709	0.0302397
Sptb	0	1.51876	0	0.400625	0.196346	1.72228	2.60938	1.86782	2.14623	1.43567	2.89413	0.00291738	0.0303208
Tmem63a	3.39007	4.59291	4.99965	4.7882	3.87119	3.36765	1.02845	0.314348	3.72198	0.228891	0.16538	0.00295246	0.0306592
Ugt2b34	4.99287	5.40979	5.92543	6.20274	5.18516	3.5993	3.24017	1.57401	5.23376	3.4453	0.2293	0.00299421	0.0310662
Cox4i1	9.46472	9.12543	9.60608	9.33454	9.22253	11.2791	11.2791	10.1675	10.2791	10.5962	2.58388	0.00301351	0.0312398
Gnl3	4.47904	5.00746	3.9677	3.21041	3.10935	2.29143	3.02434	2.46424	1.73955	1.74331	0.307314	0.00301758	0.0312553
Ptpdc1	2.00136	0.169316	0.0106338	0	1.26185	2.96565	2.45208	2.18193	2.15164	2.15833	3.23394	0.00302144	0.0312687
Nek2	0	2.14623	1.82291	2.33755	2.12379	0	0	0	0	0	0.310767	0.00302956	0.031326
Kcnk3	2.30955	3.55132	0.0454895	2.55263	1.93022	0	0	0	0	0.325204	0.247792	0.00303365	0.0313417
Prss3	11.1625	11.2135	11.2135	11.851	12.1362	6.63747	7.01823	6.1946	12.5335	3.84512	0.0518482	0.00304072	0.0313881
Tie1	0.790009	0.169316	0	0	0	1.09511	1.77982	1.38409	1.29585	2.16591	2.55317	0.00308357	0.0318034
Me2	3.39078	4.17137	2.88676	5.86714	5.73141	6.34112	6.18356	6.86074	6.2746	6.96934	4.33604	0.00309241	0.0318267
Gng13	3.45045	5.61298	0	1.02095	3.03349	6.04818	5.97185	4.76066	6.21185	5.62078	8.56878	0.00309304	0.0318267
Resp18	4.95215	3.79851	3.66946	0	4.35994	2.01831	0	0	0	0	0.129197	0.00309369	0.0318267
Acot8	0.802557	1.68572	1.61663	2.59463	3.43537	3.50814	4.14199	3.98125	3.47396	3.8674	3.40479	0.00309685	0.0318324
Gpx8	2.82026	0.169316	3.84213	3.11604	4.70752	0	0	1.21093	0	0.690898	0.170674	0.0031055	0.0318944
Nfic	3.43035	2.94155	1.94362	3.11413	2.43112	2.032	1.49001	0.897895	1.09453	0.0494337	0.316575	0.00315172	0.0323417
Cep57l1	2.95379	2.14726	1.59106	0	2.84662	0	0	0	0	0	0.266509	0.00315967	0.0323822
Bloc1s5	1.34131	0.169316	2.6051	0.786791	0.387889	2.34143	3.07078	3.23045	2.63317	2.74142	3.35281	0.00316099	0.0323822
Apbb2	1.22976	3.20394	1.32819	2.79728	1.72977	0	0.849029	0.518826	0	0.518826	0.311985	0.00316844	0.0324126
Tacc2	2.25166	1.66634	3.29117	0.866475	3.28422	0	1.5454	0	0	0	0.256513	0.00316929	0.0324126
Rap1gap2	4.28731	4.21311	3.17621	3.41047	3.93037	1.91446	1.87769	2.94846	2.6551	2.43342	0.369164	0.00317314	0.0324247
Lmo7	1.39119	2.30785	3.31835	3.39195	1.82585	4.40984	3.87374	4.18088	3.86162	4.09061	3.10868	0.00319385	0.0326089
Clock	4.55241	4.59437	5.04587	4.23702	4.4684	3.69614	3.26646	3.56952	2.76486	3.09807	0.405957	0.00320024	0.0326467
Tpst1	4.42866	0.169316	3.60446	3.53052	6.10433	0	0	0	0	1.99745	0.111262	0.00320588	0.0326768
Matn4	0.536219	2.15452	1.34313	1.18924	1.67011	0	0	0	0	0	0.38458	0.00320886	0.0326798
Slc2a12	0	0.169316	2.44964	0	0	1.73746	1.83746	4.46305	2.55334	4.73208	5.81947	0.00321823	0.0327479
Epcam	7.56343	7.44036	9.07898	7.90008	8.53089	9.34872	9.36597	10.3149	9.19253	10.8708	3.28486	0.00323283	0.032869
Nek8	0	2.99727	0.993149	2.04116	0	2.39824	2.86649	3.74136	4.23363	3.95736	4.70142	0.00325802	0.0330973
Ggt1	3.50886	5.30131	1.65109	5.21529	2.66946	2.00724	0.821889	1.37289	1.04719	1.20907	0.192436	0.003266	0.0331235
BC016579	4.80051	0.169316	1.75494	2.96459	4.48132	5.06321	5.07593	6.83977	5.03515	7.15079	7.99355	0.00326604	0.0331235
Mettl1	4.15043	3.79636	4.40539	4.58055	3.23491	3.38849	2.50859	2.37705	1.73078	2.53589	0.347391	0.00327622	0.0331991
A930015D03Rik	0	0.169316	0.300966	1.21327	1.46378	1.64403	1.93855	2.32861	2.448	2.16475	2.78046	0.00328089	0.0332187
Slc2a1	3.34058	3.23398	0.369605	0	1.476	4.15321	3.60239	4.13715	3.63676	4.50209	5.00125	0.00329665	0.0333505
3110082I17Rik	2.47531	4.87275	3.51909	0.499806	4.39536	1.19486	1.31708	0	0	0.240745	0.164718	0.00330004	0.033357
Slc25a13	3.05235	3.06	3.3771	2.49101	3.09272	1.33184	0	2.00029	2.36407	0.967342	0.311665	0.00330641	0.0333936
Hsd17b13	3.29412	0.169316	6.56536	1.97911	6.41371	0	0	0	0	0	0.0777873	0.00331562	0.0334589
Piga	2.81666	3.99032	2.03825	1.25851	2.5991	0.738001	1.15906	1.31041	0	0.251786	0.27764	0.00333581	0.0336347
Gss	6.13928	4.38753	5.37684	4.59549	5.11971	3.71364	4.03468	3.916	2.7255	3.30798	0.333507	0.00335433	0.0337934
Gpr137b-ps	3.05112	3.52386	2.53632	1.93924	1.4238	3.15741	4.50549	4.37971	4.4276	4.65174	3.31618	0.00337366	0.03396
Ints9	0.608202	0.169316	0.0185576	0.720698	0.320877	1.87769	1.5992	1.37716	1.27356	2.67763	2.62719	0.00337708	0.0339663
Lyrm1	0	0.169316	3.32297	0	0	1.47764	4.42085	2.92851	3.86864	3.77957	6.04854	0.00338816	0.0340497
Sparc	5.37442	3.88736	4.28372	4.57047	7.39385	0	0	0	2.23236	5.32316	0.0829933	0.00339271	0.0340522
1700102H20Rik	0	0.169316	0	0	0	0	2.44924	2.71597	3.48353	1.61182	4.05092	0.00339401	0.0340522
Guf1	5.60795	5.64326	4.02251	5.41242	5.23709	1.8478	4.72168	3.40532	0.905409	3.35455	0.197826	0.00340113	0.0340929
Nipal3	1.14203	1.77279	0.406796	0.412178	0.469706	1.88798	2.73843	2.14531	2.73028	2.01091	2.75467	0.00340643	0.0340929
Rnpepl1	8.23087	8.06848	8.10565	8.19916	7.68821	10.5193	10.8708	9.15103	9.07898	8.89132	3.1249	0.00340648	0.0340929
Sptlc2	1.69841	3.24448	4.75481	4.63237	5.78652	6.2513	6.64825	6.27744	6.20768	6.2093	4.90915	0.00341873	0.0341873
Slc22a21	0	0.169316	1.37158	0	0.547269	2.17528	3.07875	1.75965	1.28894	1.74004	3.01237	0.00345901	0.0345536
Prss8	6.2348	6.19659	7.67636	7.66421	6.58714	5.00601	4.61341	5.37005	5.97084	5.3997	0.329919	0.00346104	0.0345536
Ddc	5.9348	5.45485	5.35438	3.65923	6.12201	4.4684	0	3.15511	3.41555	2.00427	0.154279	0.00346626	0.0345773
Clybl	3.64754	3.27581	4.45994	5.5202	4.60508	1.67116	2.87385	0.710824	2.15912	3.60087	0.233493	0.00347276	0.0346137
Mov10	0.759762	0.169316	2.61774	3.20605	2.30153	3.34159	4.18654	4.31437	3.75955	3.60704	4.08671	0.00348857	0.0347428
Gm5771	11.1034	11.1625	11.0336	12.2213	11.9588	6.89291	6.72183	6.83079	12.6292	4.6977	0.06509	0.00350244	0.0348524
Pak3	3.49864	2.94456	0.967342	0.656021	1.53989	0	0	0	0	0	0.264018	0.00351098	0.0349
Ldlr	3.35741	3.84578	0.292919	2.74612	1.53294	5.30492	4.80051	4.42787	4.30353	4.00379	4.63667	0.00351296	0.0349
Grhl3	0	0.169316	0	0	0	0	4.05968	1.58822	4.61601	2.87891	6.04063	0.00352465	0.0349708
Actr2	5.101	4.89879	4.96086	4.88267	5.35943	6.16781	6.33825	6.39279	5.89301	6.37857	2.28713	0.00352584	0.0349708
Cd164	7.43423	7.27863	7.39385	7.47061	6.92412	5.88353	5.101	6.34736	6.01858	6.43475	0.394133	0.00353256	0.0350089
A930012L18Rik	0.868419	0.169316	0	0	0	1.449	1.49363	1.20105	2.42672	1.32032	2.58578	0.00355111	0.0351641
Ccnb1	0	2.51939	1.36027	3.4115	2.98789	0	0	0	0	0	0.240514	0.00357348	0.0353413
Fkbp10	0	2.87056	3.75449	1.29059	3.57494	0	0	0	0	0	0.203329	0.00357482	0.0353413
Il22ra1	0.771953	2.32895	0.408361	2.89489	2.67763	0	0	0	0	0	0.283937	0.00360101	0.0355713
Cyp4f14	0	0.169316	0.0105065	0.980551	0	3.41219	1.91608	0.293456	3.73248	2.32074	4.29576	0.00361267	0.0356576
Itgb6	0	2.06709	4.3101	0	0.976272	4.20772	4.38834	3.97717	3.62286	3.81138	5.77893	0.00362185	0.0357154
Smim12	3.15226	4.23962	1.88376	1.9079	2.69495	3.83812	4.19056	4.60084	5.93044	5.01623	3.83583	0.00362441	0.0357154
Baiap3	5.5662	0.169316	5.24645	2.63361	4.2899	0	2.02049	0	0	0	0.110568	0.00363805	0.0358208
Pmvk	2.45657	0.169316	1.26505	2.07125	0.35737	3.16811	3.45432	3.43708	2.24732	2.9874	3.47	0.00364461	0.0358564
Flii	0.47543	1.96463	1.97256	1.5758	1.03363	2.53149	2.65624	2.85782	3.14484	2.91111	2.66824	0.00365506	0.0359301
Enpp1	0.474311	1.553	1.85436	2.45492	1.31875	0	0	0.357923	0	0	0.363623	0.00366171	0.0359664
Aurkb	3.03316	0.169316	2.92491	1.17609	4.31652	0	0	0	0	0	0.199713	0.00366913	0.0360026
Hist2h2ab	2.44473	2.26433	1.04083	1.98557	1.40149	3.0792	3.68321	2.88428	3.63259	2.98219	2.68496	0.00367132	0.0360026
Gm6548	5.90902	5.95306	6.46036	6.32819	6.20126	4.6233	4.84608	5.17219	5.17071	5.02102	0.434154	0.00367888	0.0360477
Dpagt1	3.11575	2.45385	3.29984	3.94653	2.8545	4.62446	4.10127	4.7882	4.17301	5.04779	2.66263	0.00368584	0.0360868
Chrnb1	4.05284	2.79427	3.83215	4.29751	2.97697	0	0	1.18684	2.96985	2.6384	0.212903	0.00371139	0.0363077
Ssr1	6.8988	7.49095	7.06593	7.10718	7.35789	6.15253	5.68608	6.03377	5.72504	6.27376	0.432295	0.00371758	0.0363099
App	8.8699	8.75824	8.90025	8.87988	7.44755	7.63554	6.85451	5.19565	7.52444	6.48688	0.280922	0.00371759	0.0363099
Fuom	3.55873	3.83778	2.81241	4.34229	2.73843	1.56437	2.32016	1.6	2.64477	1.26874	0.334872	0.00372539	0.036357
Tank	2.29099	2.96232	1.87704	1.61663	2.81326	3.42559	3.17389	3.9239	3.93037	4.48935	2.78287	0.00373236	0.0363958
Mthfsl	2.80865	2.89324	2.24252	2.11245	2.4987	3.80446	4.24851	3.50109	4.0716	3.3669	2.44088	0.00375499	0.0365871
Tnik	0.795138	4.04134	0	1.20267	1.79488	4.15527	4.71488	3.20089	3.49164	3.82338	4.96023	0.0037738	0.0367409
Pbx1	5.34236	4.76882	4.98795	5.16706	3.49864	4.13442	3.08696	2.6347	3.08955	2.72739	0.325705	0.00377917	0.0367638
Slc38a5	3.29864	3.63011	0.141203	2.27285	1.21014	0	0	0	0	0	0.231553	0.00379904	0.0368917
B3galnt2	3.2136	3.20511	2.26237	2.72319	3.09614	0.662719	2.26908	2.10893	0.620311	0.935552	0.334305	0.00380015	0.0368917
Ehf	6.24103	6.40207	5.99332	5.44708	5.92466	7.58642	7.06593	7.46502	6.84595	7.38634	2.40877	0.00380142	0.0368917
Izumo4	1.16397	1.62655	1.13793	0	0.849029	2.21449	3.33333	2.01129	2.48717	2.19351	2.81369	0.00381043	0.0369343
Ccdc88b	0	0.169316	0.139478	0	0	1.59238	1.08773	1.34796	1.48239	0.788387	2.29423	0.00381281	0.0369343
Tiam2	0.828185	0.169316	0	0	0.152438	3.67652	2.54879	1.38672	1.70853	0.871461	3.50257	0.00381492	0.0369343
Gm5617	0.760391	3.1114	2.21449	3.33438	2.68481	4.2769	4.28312	3.87856	5.15433	3.6484	3.54841	0.00382523	0.0369592
Scpep1	6.2566	7.56343	8.41196	7.74335	7.9827	2.74035	5.50189	5.80669	5.91117	6.36941	0.199477	0.00382668	0.0369592
Tctn3	0	0.169316	1.34131	0	0.606082	3.1369	3.90949	0.300698	2.32602	3.29887	4.50353	0.00383088	0.0369592
Ffar3	0	5.12788	0	0	0	4.19269	2.96809	4.58122	5.14775	4.17196	9.10568	0.00383385	0.0369592
Orai1	0.948005	0.169316	0.0264451	1.22869	0.393658	2.38983	3.14484	1.60931	2.15238	1.28894	2.95639	0.00383712	0.0369592
Mbnl1	3.4591	3.05031	3.34256	3.61655	3.16931	5.07194	5.04668	4.15604	4.72209	4.10365	2.44954	0.00383943	0.0369592
Lcmt1	5.25803	5.4638	3.84864	4.7341	3.77625	3.79548	3.02221	2.70132	2.88547	2.8242	0.336709	0.00384138	0.0369592
Nme2	8.56576	8.57411	8.01435	8.28928	8.56576	7.67636	7.41922	6.86923	7.076	6.47611	0.406558	0.00384181	0.0369592
Sertad1	0	0.169316	0	3.49757	4.19769	4.02608	4.64125	4.10093	5.11208	4.26633	7.24215	0.00384623	0.0369725
Letmd1	0.883068	2.90681	2.06474	2.16098	1.49534	2.69519	3.66946	3.93239	3.43866	3.61562	2.96509	0.00385621	0.0370391
Stam	4.17086	5.00601	5.13915	4.74545	2.54105	2.77734	2.05003	3.22804	1.6011	2.52134	0.270756	0.00387709	0.0372103
Myh14	1.56849	2.63035	0.0237013	2.69628	0.683955	3.65039	3.61158	3.33711	3.51454	2.84997	3.6608	0.00388358	0.0372432
Eef2k	1.13839	1.7715	2.22168	1.58709	1.06939	2.61774	2.3144	3.65832	3.03212	3.25742	2.67288	0.00390782	0.0374461
Lrrc8c	1.28105	1.48307	1.86851	2.60288	0.329596	0	0	0	0	0	0.350377	0.00393655	0.0376917
Gorasp1	3.9136	3.04827	4.60394	3.40267	3.77058	2.17707	2.26834	2.63174	0	2.35013	0.275027	0.00394451	0.0377158
Gpcpd1	4.60729	5.00844	3.5478	4.42572	3.89898	5.39102	5.62735	5.83723	5.35943	6.30584	2.65099	0.00394527	0.0377158
Chga	6.72183	3.51322	6.54055	0	6.03989	2.87472	0	0	0	0	0.0630154	0.00396672	0.0378822
Tpgs1	1.32208	1.69662	1.55122	2.13946	1.44354	2.65068	2.93743	2.73626	3.39778	2.65145	2.36877	0.00396891	0.0378822
Epn2	1.52586	1.56772	2.13946	2.13636	1.29382	3.15284	3.43216	2.77828	3.33032	2.49205	2.46996	0.00397361	0.0378973
Fdft1	4.72283	0.169316	5.74696	5.55751	5.44412	6.39279	7.21286	8.48395	7.56343	8.24973	9.52953	0.00397925	0.0379213
Cdkn1a	7.34574	5.34349	3.93758	4.37671	6.01312	7.68467	7.67636	7.33173	7.15736	7.26086	4.05265	0.00398577	0.0379264
Mtmr12	1.57985	0.169316	0.748162	2.64525	0	2.57935	2.91851	2.49026	2.68592	3.57606	3.5345	0.00398602	0.0379264
Gm5643	3.68941	4.05195	3.59765	4.0495	3.41493	2.15912	3.06462	2.19015	2.80101	2.20893	0.412961	0.00400972	0.0381032
4833423E24Rik	0	0.169316	0	0	0	1.38127	2.70132	3.70236	0	4.00521	5.00777	0.00401086	0.0381032
Crym	0	0.169316	0.381676	0	0.743497	3.80817	1.83786	4.4684	0	4.53613	6.36964	0.00404496	0.0383971
Pycr1	2.48131	3.00246	3.93696	3.06239	5.08297	0	0	1.97541	2.6166	1.83672	0.213532	0.00404878	0.0383988
Acer2	3.18975	1.6881	1.57252	2.80954	2.55987	1.62443	0	0.206148	0	1.41531	0.304649	0.00405165	0.0383988
Gatsl2	4.72052	4.53188	0	1.51936	2.66105	0	0	0	0	0	0.155333	0.00405461	0.0383988
Gm9926	1.90448	2.4051	1.8611	2.99158	1.22484	0	1.75819	0.308768	0	0.0433073	0.317457	0.00406159	0.0384159
Cfh	2.76081	2.02807	1.40093	3.33711	4.26603	0	0	0.286462	1.64581	1.64403	0.242603	0.00406274	0.0384159
Dock11	3.88941	0.169316	0	0	0.680962	3.85237	4.28963	3.40302	1.89668	4.42927	6.17422	0.00407828	0.0384844
Cbx2	1.79753	1.95069	0.869322	0.474311	2.02421	0	0	0	0	0.0845973	0.37728	0.00407917	0.0384844
Mgam	1.63131	4.35653	0.814581	5.30492	1.31775	0	0	0	0	0	0.155499	0.00407952	0.0384844
2610015P09Rik	3.33333	3.26456	3.07429	2.83358	3.13085	1.81055	2.65546	1.10122	1.67239	1.7762	0.399382	0.00408264	0.0384844
Wdfy1	1.90298	2.40791	1.5758	2.80009	1.69886	3.84269	3.57274	3.25367	2.9578	3.45232	2.52927	0.00410752	0.038689
Prom1	7.73911	7.50465	8.51629	7.74848	7.47918	9.47879	9.15103	9.39544	8.36433	9.30111	2.53256	0.00411481	0.0387276
Slfn9	4.34479	6.21185	4.30705	4.75411	5.42515	0	5.03384	3.57657	0	0.166461	0.104878	0.0041338	0.0388763
Galm	3.17087	1.86263	4.01431	4.14287	3.03741	1.33034	0	2.13636	0	2.34551	0.235994	0.00414771	0.0389769
Slc9b2	0	2.85643	5.74074	4.68159	3.61595	0	0	1.71679	0	0.13219	0.12421	0.00417864	0.0392373
Pip5k1b	4.57047	0.169316	3.90417	3.2857	3.54915	5.85289	5.16054	5.32725	5.47488	5.49243	5.15451	0.00418764	0.0392914
Tirap	0.432373	0.169316	0.820818	1.20907	0	2.12379	1.8452	1.54477	1.70889	1.83245	2.43632	0.00419919	0.0393694
Prc1	2.53197	2.49639	0.286462	0.797887	2.78809	0	0	0	0	0	0.291151	0.00420286	0.0393734
Hspb1	4.30645	4.89509	6.03519	5.80958	6.74403	3.15681	0	3.00909	4.76993	3.52247	0.157519	0.00422874	0.039559
Fut4	0.566309	1.4732	1.24944	3.6785	2.2013	0	0	0.106447	0	0	0.284705	0.00423162	0.039559
Samd4	2.75115	0.169316	1.24658	2.42779	1.70263	0	0	0	0	0	0.316551	0.00423459	0.039559
Eefsec	2.42469	0.169316	2.08878	1.79124	0.842806	2.33859	3.00246	3.5092	3.70845	3.29771	3.26688	0.00423862	0.039559
Sema4g	2.98872	2.50859	1.50531	2.47921	0.773919	3.69566	4.64908	3.39007	4.33439	2.96707	3.37785	0.00423893	0.039559
AI467606	0.95373	0.169316	1.37341	0	0.149793	0.965898	2.04441	2.42277	3.38102	2.27022	3.22123	0.00425137	0.0396291
Slc9a9	3.4947	2.44444	0.330059	0.404873	0.110972	2.70076	3.83941	5.00325	3.72466	3.38762	5.18424	0.00425296	0.0396291
Hist1h4h	2.54973	3.70469	3.69022	3.54915	3.423	4.14484	4.7596	4.67281	6.02436	4.82604	2.83269	0.00427227	0.0397786
Nr5a2	4.47442	5.88892	3.21752	5.1997	3.1539	3.62556	0	2.58781	2.3131	0.393658	0.164611	0.00429359	0.0399465
Mcm3	3.30673	2.77689	0.269498	1.81969	3.16884	0	0	0	1.30753	0	0.24882	0.00430621	0.0400333
Atp10d	2.91814	2.46645	3.76	5.13724	2.32895	2.53115	1.80024	0.306455	1.06755	0	0.220511	0.00432999	0.0402236
Ncoa3	1.82521	2.5721	2.38615	3.97035	2.15298	4.70253	4.05939	4.06166	4.58843	3.48389	3.02686	0.00433592	0.0402328
Anxa5	6.40461	5.03384	5.77272	5.82146	5.9077	4.00122	4.69933	4.67135	1.91231	4.28963	0.272949	0.00433871	0.0402328
Lipo1	0	0.169316	3.3468	0	2.6744	2.86953	2.43232	4.86815	4.61919	4.62523	6.25401	0.0043409	0.0402328
Notch2	2.86325	2.38694	3.30524	4.71128	1.9744	1.16487	1.70577	0.97344	1.85983	0.431742	0.283007	0.00435037	0.0402898
Lcp1	4.17641	4.55383	4.91717	0.893157	4.19881	5.86337	6.09657	7.40544	4.92289	7.35789	5.98501	0.00435572	0.0403087
Golt1b	3.8246	3.87856	3.88364	3.47785	4.40799	1.18546	1.96154	3.20939	2.54973	2.94189	0.347497	0.00439779	0.040667
Tmem159	3.32823	2.08878	2.58541	1.69256	3.64884	3.77625	5.23285	4.03833	4.00297	4.45562	3.10037	0.00440184	0.0406735
Magef1	0.444598	0.169316	0.405454	0.477999	0.315688	1.17773	1.75692	2.04868	1.00521	2.46239	2.5098	0.00440606	0.0406816
Nt5c3	2.22328	3.28107	4.08108	4.01038	5.13067	5.14148	5.52769	5.41636	5.38508	5.9017	3.31536	0.00444661	0.0410249
Hdac1	2.07239	2.82963	2.9874	1.8757	4.28098	3.82732	3.97425	5.74241	4.50709	5.44412	3.70588	0.00448141	0.041302
Entpd5	0.88467	2.27285	1.1632	0.460411	0.186486	3.14878	3.068	2.05284	2.15868	2.46888	3.00197	0.00448444	0.041302
1700112E06Rik	0	4.81115	0.347	2.94628	1.21443	3.69168	5.2668	4.25363	5.43523	4.56723	6.86443	0.00448684	0.041302
Armc10	1.83822	1.69103	1.46948	2.30006	1.69569	2.90964	3.15939	3.43913	2.48474	3.18096	2.35525	0.00450997	0.0414835
H13	6.73768	7.21286	6.98748	7.06593	7.54583	4.62579	5.85493	6.18755	6.20997	5.72504	0.38175	0.00452641	0.0416002
C2cd2l	0.891014	0.169316	0	0	0.80853	2.88022	3.21398	1.05051	1.62756	1.4257	3.17294	0.00452949	0.0416002
Tmem45a	8.11506	4.03116	7.68467	7.33173	7.80967	5.08229	4.09253	4.389	4.16859	5.31561	0.191464	0.00453819	0.0416485
Plekhb2	6.16479	5.0678	4.03395	5.77681	5.60633	7.23661	6.24103	6.78021	6.96551	7.17587	2.92799	0.00455869	0.0417926
Alg6	2.0764	3.4459	2.60768	0.490232	0.557591	2.78809	3.8503	4.2364	4.51126	4.06166	4.15251	0.00456075	0.0417926
Tstd2	3.67895	2.27022	0	0	4.39731	5.46181	4.37592	4.0127	5.224	5.13067	6.82922	0.00456617	0.0418097
Myo1b	3.96816	5.10692	4.07899	4.18979	3.62731	5.99681	5.54355	5.3335	5.34676	5.36067	2.50017	0.0045734	0.0418097
Dhcr24	1.84268	0.169316	0.452448	2.65383	0.375528	4.20861	3.48086	2.38125	3.40383	2.03898	4.01096	0.00457546	0.0418097
Ier3	4.27182	5.56803	5.26546	5.84869	4.90835	3.37501	3.39281	0.655216	4.7918	2.38068	0.209734	0.00457637	0.0418097
Gem	3.39145	0.169316	3.21132	4.2321	0.843983	0	0	0	0	0	0.193495	0.00460352	0.0420261
Reg1	13.6077	13.6077	14.4302	14.4302	14.4302	12.5335	12.6292	11.6618	13.4395	9.6277	0.229595	0.00463072	0.0422427
Prpf6	3.87284	4.52659	4.23702	4.70561	5.02276	3.09807	3.56559	3.11219	2.90598	3.41819	0.419587	0.00464129	0.0423074
Tmem102	0	1.94746	1.15225	0.522892	1.87891	2.82153	1.4104	3.86931	3.27791	3.44683	3.64242	0.00469444	0.0427599
Rps15a-ps6	6.84874	7.09552	6.38968	6.99492	6.22007	6.18172	5.33061	4.35838	5.64019	4.73266	0.363223	0.00472953	0.0430098
Amot	3.48487	0.169316	2.21885	3.09568	2.4051	5.4263	4.67044	4.7578	3.35204	3.76488	4.34551	0.00473043	0.0430098
Rnf114	2.5337	3.3141	4.0675	4.67864	5.10986	4.95792	5.69065	6.32447	5.99203	5.51596	3.37631	0.00473249	0.0430098
Edem2	5.22958	6.76652	6.82463	6.44493	6.95055	3.05112	3.76557	5.59715	4.87361	5.44102	0.268399	0.00474757	0.0431146
Gnai2	5.25461	5.72417	2.95321	4.8368	4.66523	7.34232	6.78279	5.88496	6.85634	5.77338	3.58296	0.00475577	0.0431568
Cd2ap	5.06503	4.78904	5.17219	4.59183	4.11715	4.2417	3.0409	2.88022	3.61063	3.14225	0.388528	0.00477759	0.0432807
Sft2d1	2.05793	0.169316	3.49945	3.61129	4.26192	4.57554	5.21197	5.13541	4.66755	5.32941	4.8032	0.00478119	0.0432807
Plgrkt	1.89005	2.75377	3.63741	2.58874	4.63409	4.37671	5.6682	4.52035	4.69095	5.12423	3.42303	0.00478317	0.0432807
Wnt4	3.5092	0.169316	1.02985	2.37948	2.36636	0	0	0	0	0	0.26965	0.00478366	0.0432807
Pvrl1	1.3956	0.169316	0.32249	1.95755	1.22253	3.71097	3.04789	1.7784	3.13645	1.96562	3.28153	0.00479374	0.0433397
Creb3l1	4.6406	4.12512	4.09226	5.07593	4.33936	4.04268	2.88022	2.88804	2.3809	3.1196	0.380939	0.00484063	0.0437311
Gm14057	1.33001	0.169316	0.0404532	0.840725	0.0656974	2.67225	1.5694	1.25416	1.94974	2.17656	2.70417	0.00484496	0.0437377
Ttc13	3.91549	2.51446	2.83662	3.02648	3.21106	2.09613	2.10125	1.47086	1.0863	1.96463	0.390396	0.00488101	0.0440305
Dab1	2.90825	0.169316	1.65287	3.33075	0.301914	3.17621	3.43708	3.51454	4.77845	4.39374	4.55479	0.00488754	0.0440505
Macrod1	1.92919	2.93236	1.48716	2.33232	1.34082	1.61598	0	0.211811	0	0.446781	0.341639	0.00489047	0.0440505
Atpif1	7.26086	7.06913	6.74557	7.32808	6.6129	9.03699	8.8699	7.79592	8.50712	7.63554	2.57716	0.00490116	0.0440918
Atp6v0b	5.49642	4.7789	4.67281	5.47015	5.28154	6.23336	7.52444	6.17319	6.23101	6.3367	2.56646	0.00490231	0.0440918
Rpl34	7.38125	7.0441	6.94814	7.48554	6.25543	5.09565	5.86566	5.50856	6.36531	5.5474	0.393279	0.00491008	0.0441291
Wwp2	3.14288	1.50868	1.42905	3.32718	4.49784	4.69682	4.16069	5.60448	5.1783	4.3271	4.0344	0.00495122	0.0444659
Dcun1d4	1.94033	0.169316	0.679299	1.65883	1.48239	1.18778	3.48794	3.54613	4.15628	3.17494	3.79626	0.00499984	0.0448694
9030404E10Rik	0	0.169316	0	0	0	3.49499	0	1.95598	3.22134	1.45142	3.9748	0.00500718	0.044871
Eef1d	5.87932	6.56371	6.04348	6.2348	5.74385	3.83408	5.02102	4.52069	5.4638	4.86888	0.391928	0.0050074	0.044871
Cab39l	2.72474	3.12748	3.65179	3.03316	4.60589	4.38753	5.02444	5.13724	4.76066	4.97833	2.69265	0.00502917	0.045033
Prkar2a	0.591044	2.16024	0.447032	1.42613	0.845282	3.11907	2.69519	2.4601	2.77213	1.80705	2.78323	0.00503941	0.0450914
Samd9l	5.14775	6.08558	3.592	2.95283	5.26438	7.01357	6.30983	6.7607	6.18535	6.32197	3.75751	0.00506139	0.0452548
Gabra4	3.89437	5.09808	0.759762	3.66261	0.536219	0	0	0	0.706678	0	0.159445	0.00506903	0.0452898
1500012F01Rik	6.08091	5.51086	6.07985	5.8768	5.83077	5.08047	5.35217	4.27182	3.8032	4.06082	0.389005	0.00509099	0.0454363
Cyp2d22	6.2528	0.169316	5.26438	5.70052	4.19684	0	1.778	0	2.73675	0	0.093829	0.0050929	0.0454363
Alkbh7	3.62165	0.169316	3.17357	4.38146	2.82883	5.09944	5.62078	4.63906	5.04255	4.82128	4.62565	0.00510829	0.0455184
Grb14	3.47875	3.62679	0.457595	3.03212	1.20855	0	0	0	1.2597	0	0.231836	0.00511194	0.0455184
Efna1	4.59789	4.87231	5.57918	5.00266	4.91379	0	2.36283	4.15703	4.03947	2.93236	0.203793	0.00511333	0.0455184
Polr2g	5.32316	5.96257	6.10433	4.91284	6.37392	7.09973	7.37886	6.78279	7.51419	6.67665	2.55812	0.00513625	0.0456526
Tmed11	3.09737	0.169316	1.18397	4.30216	2.1278	0	0	0	0	0	0.221269	0.00514235	0.0456526
Atp9a	6.17102	6.79081	6.53093	6.57129	6.80227	7.46502	7.64395	8.15243	7.58642	7.81703	2.23412	0.00514302	0.0456526
Ckap2l	1.43427	0.169316	2.66917	1.27294	2.75862	0	0	0	0	0	0.31625	0.00514342	0.0456526
Litaf	7.33531	6.75014	7.38634	7.87724	7.37886	7.90008	8.31761	9.50693	8.7093	9.47879	2.70751	0.00518134	0.0459446
Ephx4	2.59529	1.97502	3.8278	3.85171	1.8334	0	0	2.8265	0	0.616062	0.228753	0.00518388	0.0459446
Slco2a1	0	0.169316	0	0.777675	0	2.18673	1.94228	1.91509	2.60062	0.182425	2.98149	0.00522914	0.046312
Klhl20	1.96669	3.17389	1.17094	1.84672	1.91231	1.36938	0	0.276257	0.764977	0.0284193	0.347165	0.00524277	0.0463989
Garnl3	0	0.169316	0	0	0.399166	2.24676	1.82876	2.62457	0	1.92636	3.05589	0.00525706	0.0464915
Egflam	2.12235	1.83911	1.37225	2.15	0	0	0	0	0	0	0.354353	0.00526221	0.046503
Loh12cr1	0	1.86423	2.30926	0.884042	0.90628	2.17325	2.76847	3.04647	3.62886	2.54362	3.1153	0.00526601	0.046503
Armcx2	6.03598	3.84348	6.3327	5.00325	4.49332	3.31985	4.10841	3.17164	3.20686	3.48566	0.311378	0.00527686	0.0465428
Rps15a-ps4	5.89301	6.15693	5.53108	6.10708	5.45274	5.22013	4.56171	3.72939	4.89105	4.03299	0.394717	0.00527817	0.0465428
Mafk	2.52689	4.04211	2.86819	1.91354	2.48247	4.17563	4.08594	4.40627	4.20701	4.0697	2.68007	0.00531893	0.0467958
Fgfrl1	4.35838	5.40757	3.5716	3.6121	3.3298	2.73304	3.63417	0.494426	0	1.94816	0.203919	0.00531927	0.0467958
Cxcl17	2.84373	4.95792	7.48314	7.75446	7.12369	2.80164	0	3.32297	5.09944	1.47846	0.0888745	0.00531972	0.0467958
Ndufa8	6.8436	6.93028	6.78021	6.30202	6.6454	7.21732	8.68936	7.7737	8.18565	8.01032	2.41993	0.00532226	0.0467958
Fabp2	2.404	2.75989	0	5.71067	2.1841	0	0	0	0	0	0.163603	0.00534604	0.0469124
Arhgap12	6.15909	5.87048	5.97656	5.74614	4.68098	3.43361	3.84348	5.06673	3.0414	4.87002	0.321836	0.00534964	0.0469124
Tnfaip8	2.66105	5.2682	4.49117	5.9611	4.22948	4.07211	0	2.05658	0	2.75244	0.149066	0.00535064	0.0469124
Nr1d1	3.66977	3.5496	5.12257	2.76486	2.70627	1.58147	1.37483	2.1306	2.82922	1.15259	0.297534	0.00535429	0.0469124
Cela2a	13.2749	13.4395	12.8558	13.6077	13.8338	12.1362	11.851	9.37962	11.7892	6.37139	0.116884	0.00535683	0.0469124
4930427A07Rik	0.733802	1.86714	1.06939	2.21219	2.71686	2.89228	4.4527	3.69799	2.66237	3.17283	3.15089	0.00535866	0.0469124
Gm6682	6.58913	4.97293	5.76402	4.16902	6.9289	6.77775	7.1196	8.22624	7.37886	8.32376	3.68188	0.0053696	0.0469743
Cds2	1.85131	1.77515	2.4513	2.3933	0.556119	2.34551	3.5973	3.94509	3.32823	3.60826	2.9474	0.00542083	0.0473884
Mb21d2	2.43388	0.169316	0.590411	1.32936	0.367063	3.23185	1.85938	2.46808	3.49909	2.35321	3.25874	0.00544096	0.0475302
Dlgap3	0	0.169316	0	0	0.0846594	1.60785	1.19137	1.29382	1.3225	0.602437	2.22345	0.00544492	0.0475307
Mest	1.72942	4.02699	3.66121	1.80853	4.05133	0.873991	0	0	2.951	0	0.204404	0.00547257	0.0476956
Gstp1	9.17521	8.74639	8.28928	8.89132	8.59881	9.60608	10.0197	10.6816	9.41691	10.4327	2.44733	0.00547663	0.0476956
Hdac5	1.16487	0.169316	0.372688	1.74004	1.45286	2.76731	2.93635	3.23813	3.04746	1.1559	3.13633	0.00547814	0.0476956
Fig4	4.12911	2.24161	0	2.30403	1.27002	3.98647	3.8496	4.29598	4.66978	3.69368	4.31736	0.00547951	0.0476956
1810008I18Rik	0	5.50189	2.10637	5.14312	4.61341	0	0	1.89128	0	0	0.117058	0.00548951	0.0477485
Btc	2.1794	4.07899	2.32436	3.60087	2.64763	1.85241	0	0	2.00483	1.66884	0.275279	0.0054947	0.0477595
Zrsr1	2.93331	3.94228	1.61455	4.6479	2.23577	1.24252	0	0.576482	1.92416	1.61598	0.249492	0.00550048	0.0477756
Mgll	6.18041	3.76743	3.12936	6.73929	2.98418	6.21323	7.242	6.92412	7.338	6.93631	5.17156	0.00551981	0.0479093
Itsn1	0	0.169316	0.010498	1.41334	0.618151	1.51138	1.40759	1.67239	2.21101	2.08061	2.52159	0.00553027	0.0479658
Gna13	3.03583	4.48874	3.64598	2.16124	3.0727	4.72929	5.28863	4.64727	4.75559	4.4769	2.82576	0.00555816	0.0481733
Fbxo9	2.1183	4.54674	2.00925	3.82086	1.83459	4.27882	4.87116	4.68975	4.69303	4.81054	3.48875	0.00556527	0.0482007
Sbspon	4.80806	5.45894	2.68288	2.17797	0.972229	1.3225	0	0.456061	1.28547	0.525938	0.176529	0.00557736	0.048271
Rps12	7.60938	8.30776	6.8221	7.52444	6.41901	6.80227	6.13826	4.90083	5.67192	4.55955	0.303134	0.00558253	0.0482813
Hist2h2ac	3.94187	3.9838	2.34551	3.52927	3.38954	4.81054	5.24526	4.37501	5.10986	4.5356	2.59774	0.00561053	0.048489
Rps15a	8.24973	8.3744	7.96102	8.16758	7.60245	7.65315	6.62597	5.74904	7.12715	5.99122	0.368126	0.00561524	0.0484953
Uchl5	6.30753	5.73401	5.83825	6.17102	6.56009	3.65016	5.24645	5.46893	4.40111	4.81115	0.377194	0.00563768	0.0486545
Lcmt2	2.78643	4.06853	3.21398	2.97697	2.59529	1.34936	0.738862	2.66105	1.59061	1.84073	0.355491	0.00565085	0.0487335
Gprasp2	4.03715	4.21573	0.756191	3.79695	0	0	0	0	0	0	0.169434	0.00566833	0.0488307
2310068J16Rik	0.519784	1.52393	0.010013	0	0.216631	3.18823	2.30304	1.37225	1.26406	2.00724	2.97501	0.00567015	0.0488307
Zfp281	4.44531	4.68975	3.13604	4.71641	2.75173	2.66583	0	1.82736	2.77828	2.42317	0.248459	0.00567423	0.0488313
Wrb	2.76811	2.37705	4.12794	4.00878	5.15256	0	1.17773	2.04913	2.55123	2.33671	0.239164	0.00567909	0.0488385
Ffar2	4.55859	2.12099	3.69971	4.64499	4.30744	2.77803	2.27768	2.55987	0	1.3254	0.236818	0.00569785	0.0489652
Xrcc4	2.09155	0.169316	3.03092	0.896584	0.253457	3.12016	2.21826	3.54278	3.73715	3.36821	3.75535	0.00570223	0.0489683
5930430L01Rik	1.05756	1.53634	0.649768	0	0	1.88928	1.48036	2.91111	1.8843	2.35049	2.74038	0.0057292	0.0491651
Pecr	2.69038	4.39202	2.13883	3.14537	3.28233	0	1.76829	2.10019	0	2.16908	0.263838	0.00574834	0.0492946
Sema4a	3.1725	2.78049	1.90757	4.11589	3.13401	5.03272	4.0434	4.64499	5.1972	3.92507	2.92124	0.00577009	0.0494463
Eps8l2	3.73349	3.33144	3.92194	4.9257	3.9291	5.14028	5.52218	5.52266	4.90237	5.21113	2.44764	0.00577968	0.0494936
Zfp946	4.58055	2.47569	1.30753	1.91005	3.03781	0	2.27867	0.324417	0	0.154388	0.231513	0.0057888	0.0495368
Hnf4a	6.19283	3.61129	4.57241	2.67634	2.996	6.15909	6.2433	5.85289	6.62392	5.30425	4.07533	0.00579971	0.0495953
Bak1	0	2.04657	0.318163	1.28547	1.17192	3.65808	2.7851	2.07005	2.4851	1.92879	3.07588	0.00580502	0.0496058
Uspl1	4.66689	1.70781	0.552823	2.63777	5.8	5.83212	5.40428	6.09486	5.48209	6.11573	6.55573	0.00581293	0.0496385
Ndfip2	3.1546	2.25286	3.16444	2.07595	2.46768	3.9333	3.75229	3.61317	3.73599	4.30744	2.37074	0.00584833	0.0498731
Cers4	1.89763	2.88083	2.40105	1.9807	2.18967	0	0	0.272017	2.52134	0	0.305384	0.00584861	0.0498731
Tmem29	1.42526	0.169316	1.5227	0	2.80517	4.27735	3.31197	3.03392	1.89787	3.13804	3.85663	0.00586818	0.049987
Pelo	2.88083	5.00963	3.87909	3.77058	2.12015	2.523	1.53572	0.285602	2.56732	0.222718	0.232422	0.00587018	0.049987
Pitpnc1	1.22051	2.37041	2.20652	1.56647	0.952127	0.851329	0	0	0.666954	0.0256411	0.391091	0.00589577	0.0501697
Galk1	3.15994	3.89036	4.61462	5.68521	4.73978	5.16107	5.66713	7.26415	6.45179	6.43334	3.42835	0.00591762	0.0503205
Ass1	0.847736	2.02745	2.78643	0.754389	1.67337	0.701362	0	0	0	0	0.359085	0.00593166	0.0504046
Map4k3	3.65016	5.04172	2.00104	4.2797	3.34365	1.58709	1.90145	0.784823	2.92147	1.66483	0.26956	0.00594442	0.0504778
Mrpl46	6.27082	2.34735	5.05948	4.35994	5.81694	6.95055	6.65124	6.95055	6.50367	7.19258	4.22459	0.00594984	0.0504857
Nt5dc2	3.33249	3.3669	0.850073	1.75136	0.373418	0	0	0.147764	0	0	0.266961	0.00595366	0.0504857
Chil4	0	5.06976	2.88428	3.89485	2.61774	0	0	0	0	1.69219	0.170177	0.0059627	0.0505271
Sirt1	0	2.45175	2.61187	1.00085	0.427499	4.65836	1.97181	3.44631	3.0859	3.52024	4.10713	0.0060221	0.0509949
Lmbr1	1.18623	2.95949	0.54187	0.569771	2.34844	2.44644	4.12389	4.02572	3.34777	2.82153	3.56008	0.00603416	0.0510615
Tex9	1.93449	3.34417	2.48587	2.35142	1.11166	0	0.90241	0	1.73814	0.413446	0.322033	0.00604231	0.051095
Birc5	0.891751	1.59255	0.974764	2.23795	1.7368	0	0	0	0.885756	0	0.40343	0.00605299	0.0511497
Sult1d1	3.2079	2.38013	4.22019	2.8362	4.39374	4.35896	5.76611	4.33994	5.73559	5.11897	3.15203	0.00605885	0.0511636
Dffa	1.11661	0.169316	1.18546	0	1.23819	1.75577	2.72157	2.20236	1.57985	2.22987	2.55969	0.00607136	0.0512337
Gm15972	0	0.169316	0.525938	0	0.444598	3.37444	0	1.97097	2.1728	2.60591	3.47461	0.00610051	0.051444
Snhg6	4.07267	4.33384	3.48914	4.87231	4.15628	3.51601	3.09092	1.95328	3.07674	2.29418	0.379291	0.00611777	0.0515538
Atf5	3.95944	5.38236	3.02648	3.10808	2.87109	1.24658	0	0.764977	3.69614	1.43307	0.21149	0.00612593	0.0515868
Tifa	0.980025	2.7845	3.22694	0	2.23931	0	0	0	0	0	0.278132	0.00614389	0.0517023
Sfxn2	3.46732	3.76046	3.12278	1.83786	0.224835	1.00276	0	0.368058	0.805077	0.0868895	0.244839	0.00616115	0.0518116
B4galt4	2.49522	4.58757	1.28432	3.51867	0.206516	4.9545	4.15485	5.05644	4.52406	4.80863	4.86094	0.0061731	0.0518475
B630019K06Rik	4.80463	5.62532	1.90876	1.83746	0.677385	0	0	0	0	1.26081	0.151927	0.00617704	0.0518475
Plbd2	3.25414	3.22063	4.46437	4.50136	3.95996	1.80816	0.913028	2.91887	2.88214	2.79187	0.325949	0.00617821	0.0518475
Gm16551	2.7104	1.55029	0.595731	1.99196	1.25485	0	0	0	0.858115	0	0.36627	0.00619648	0.051965
Cxxc5	5.24526	5.85017	4.7186	4.93593	4.79241	3.73349	3.6484	4.46437	2.93384	4.07933	0.395956	0.0062075	0.0520073
Nop56	3.4115	3.56813	2.84317	3.46767	3.13009	1.16858	2.17079	2.34879	1.79629	2.5991	0.415408	0.00621008	0.0520073
Cpt1a	4.11182	3.5973	4.15321	3.68473	3.12748	5.42717	5.21337	4.62988	5.08982	4.48736	2.35318	0.00621563	0.0520179
Ppapdc1b	5.70684	5.6378	5.6798	6.05962	6.14217	4.35146	4.52263	4.94983	4.71231	5.05254	0.457712	0.00622658	0.0520339
Hspg2	1.88245	2.23236	2.06372	3.04464	0.437374	0	0	0	0.710824	0.978953	0.331217	0.00622728	0.0520339
Vill	2.79008	2.65446	4.17301	2.18078	4.93593	1.88116	2.21054	2.05884	0	0	0.230567	0.00623706	0.0520339
Srsf11	6.75341	5.49846	6.00813	6.45652	6.2433	4.24487	3.84026	5.22237	5.51796	5.02733	0.373348	0.00623764	0.0520339
Procr	2.89947	0.169316	3.53052	2.31131	4.67764	0	0	1.34025	0	0.824957	0.205241	0.00623893	0.0520339
Neurl1a	3.93566	0.169316	3.27206	2.55003	3.40634	5.22118	4.53906	4.01083	5.72062	4.47548	4.36734	0.00625002	0.0520907
Smtnl2	2.10515	0.169316	1.71756	2.01511	0.978953	0	0	0	0	0	0.379661	0.00625501	0.0520966
Prkx	3.72939	0.169316	1.66836	2.51355	0.369976	4.72809	2.54273	4.61114	4.98081	3.25186	5.03785	0.00626164	0.0520983
Tbc1d9	0	4.03252	2.69388	0	2.06095	4.8964	4.78728	4.84305	4.0066	2.71201	5.624	0.00626379	0.0520983
Ptgr1	5.27831	3.84269	4.82538	4.69469	4.3373	1.53294	3.88682	2.57036	3.98158	0.460411	0.231767	0.00626889	0.0521051
Cnnm4	0	1.63199	0.347671	0.834191	0	1.69662	1.76654	2.40727	1.5463	2.25682	2.58818	0.00627923	0.0521554
Asrgl1	0.522048	3.76488	0.774565	2.32602	1.69049	0	0	0	0	0	0.284086	0.00629005	0.0521681
Dtx1	1.2401	2.23041	1.87111	1.90716	0	0	0	0	0	0	0.366083	0.00629212	0.0521681
Ptk2	4.26714	3.42677	4.54994	4.99677	2.13318	1.84964	1.73236	1.72891	1.38127	3.33731	0.273789	0.00629364	0.0521681
Shc1	4.29883	3.01001	5.00533	5.08982	4.6977	2.71336	1.7593	3.63259	2.67267	3.19242	0.323925	0.0063041	0.0522192
Ptprs	3.43298	3.85609	5.67192	4.7725	5.30348	4.66606	0	1.15959	3.09694	1.23872	0.167806	0.00633036	0.052352
Gbp8	1.27612	0.169316	0	0	0.119233	2.72614	3.3557	1.81926	2.07239	0.374568	3.37919	0.00633187	0.052352
Fam81a	0.646017	3.70088	0.351288	2.5816	2.51299	0	0	0	0	0.191217	0.264197	0.00633304	0.052352
Snx14	1.94974	0.169316	3.24996	1.91509	3.12197	3.10893	4.21198	4.02336	3.85724	4.40799	3.5818	0.00634454	0.0524114
Tmem160	3.52119	4.00993	3.80446	4.60807	3.53303	5.28068	5.52317	4.67764	5.36418	4.79103	2.34893	0.00635582	0.052469
Cdca7l	0.85581	3.71448	0.821889	2.97667	1.82521	0	0	0.928517	0	0	0.276796	0.00637402	0.0525734
Rbms1	1.78254	3.43537	2.60663	2.14491	2.1306	1.94412	1.27973	0.47466	0.73744	0.209699	0.355795	0.00637827	0.0525734
Ube2e3	4.96271	4.63409	4.48605	4.62935	3.27415	2.57159	1.46435	2.90825	3.58405	3.45784	0.329865	0.00638144	0.0525734
Arhgef2	1.61344	3.26797	3.65975	2.52806	3.13844	4.33936	3.52283	4.52263	4.64012	4.53841	2.77241	0.00640425	0.0527256
Lhfpl2	3.13804	3.8816	1.44761	1.60986	0	0	0	0	0	0	0.247342	0.00643725	0.0529614
Arfip2	7.3481	7.00295	7.0728	5.22621	7.15079	5.05134	4.12984	5.68322	5.60564	5.35063	0.330785	0.00647057	0.0531995
Foxc1	3.8315	3.17087	1.61598	2.93919	0	0.513522	0.777675	0	0	0	0.240937	0.00648885	0.0533138
Tmem65	3.7611	1.65619	4.17923	3.14967	3.2857	5.85213	5.6534	4.07933	4.9587	4.24612	3.36722	0.0065034	0.0533645
Klf7	0	0.169316	0.480466	2.40665	0.38816	2.43292	3.28422	1.63623	2.12235	2.27867	3.16446	0.00650751	0.0533645
Acox1	2.82351	4.31343	3.72318	4.80051	3.40589	5.93693	5.16814	5.02276	4.94274	5.13541	2.69053	0.00650818	0.0533645
Phospho2	1.34936	0.169316	1.66667	0.452448	2.93955	3.35798	3.55458	3.03212	2.10789	3.21106	3.33401	0.00652717	0.0534715
Gins1	3.85724	3.36104	2.87307	3.97478	2.26551	1.39013	0	2.09352	2.97517	0	0.254447	0.00653003	0.0534715
Bmp7	2.68812	4.68377	1.8452	2.50402	0.177989	0	0	0	1.03858	0	0.221887	0.00654879	0.053589
Gtf2ird2	1.8757	3.31985	2.819	3.78118	0	0	0	0	0	1.32936	0.234348	0.00655887	0.0536354
Sst	10.8708	3.05816	11.1034	1.01732	9.37962	2.06872	3.8032	0.259782	0.72154	0.0862095	0.0192638	0.0065901	0.0538546
Slc35a5	0.494106	0.169316	2.96648	3.19242	1.91839	3.75183	3.99639	4.2797	3.15226	3.29541	3.85565	0.00662156	0.0540753
Dnajc25	1.99626	2.56898	3.07875	3.80682	3.26756	0.873012	2.13105	0	1.69256	1.89196	0.323995	0.00667266	0.0544561
Atp11a	4.49413	4.99965	5.16181	5.41511	3.49696	2.02493	3.30798	2.64883	2.82491	4.40033	0.313789	0.00668079	0.0544699
Agpat4	0	2.41541	3.27715	2.23542	2.15164	1.09019	0	0	0	0	0.287595	0.00668422	0.0544699
Kansl1l	4.69188	4.58934	2.68812	2.23348	3.41555	1.66397	1.98604	1.45602	2.70663	0.870146	0.289751	0.00668999	0.0544699
Prr14	2.50099	4.07616	3.81215	4.2596	4.51914	4.823	5.47806	5.42386	5.02635	5.41895	2.63981	0.00669227	0.0544699
Hpgd	2.74083	3.9197	4.16633	2.94653	3.86204	4.4302	5.42175	5.32941	4.16427	5.46781	2.70495	0.0067202	0.0546325
Fam57a	0	0.169316	2.00633	1.80274	2.4851	1.36577	3.85757	4.53404	3.18715	4.65334	4.68119	0.00672449	0.0546325
Pradc1	1.38353	1.75629	3.30388	2.22676	1.50463	3.10245	3.74478	4.41415	2.69303	4.04897	2.96013	0.00672573	0.0546325
Rps5	7.64656	7.8386	7.45447	7.84954	7.50861	6.77566	6.86074	5.73672	6.83292	6.11294	0.436556	0.00679671	0.0551722
Amotl2	2.53426	0.169316	3.18749	2.97637	2.30733	0	0	0.368662	1.46711	0.158994	0.280097	0.00681866	0.0552796
Ocel1	1.77453	0.169316	2.20987	1.87891	1.83264	2.2717	2.88083	3.593	4.12548	2.92274	3.00153	0.00681903	0.0552796
Vps37b	2.87963	1.89587	4.1621	2.70891	2.5114	4.08447	3.86108	4.21264	4.58003	4.58567	2.70044	0.00683803	0.0553967
Hap1	2.09352	0.169316	0.661054	0.72631	1.17329	3.33954	2.45765	2.5737	1.53249	2.39751	2.81958	0.00685239	0.0554741
Tfb1m	2.03625	2.85363	0.934989	1.01226	0.775929	2.31131	3.14736	2.74142	3.68321	3.62448	2.98751	0.00685671	0.0554741
Cyb561d1	0.983719	0.169316	0	1.93582	0	2.04868	2.7267	2.17079	3.55213	1.15307	3.27729	0.00688559	0.0556337
Tbp	0	0.169316	1.58586	1.61054	2.09394	1.12348	4.14127	3.10702	3.43401	3.40054	3.86196	0.00688707	0.0556337
Spns2	4.98148	5.0556	4.36226	6.32568	3.64495	2.8818	3.55605	2.09394	4.26016	2.68659	0.291529	0.00689017	0.0556337
Slc9a3r2	1.90933	1.68645	3.57339	3.41776	2.98352	0.792739	0.909678	1.65235	1.94294	0.0693907	0.320707	0.00689769	0.0556576
Crem	5.54974	2.84288	4.80128	3.69683	2.86511	0	0	2.82922	3.38762	1.34642	0.184474	0.00693006	0.0558816
Hint3	0.979417	0.169316	2.45492	2.26908	1.91446	3.59356	3.46375	2.37361	3.74387	2.75377	3.09142	0.00693798	0.0558919
Ifi35	0.80072	2.47693	2.20601	3.51738	2.77655	3.59099	4.35346	4.38396	3.35653	4.10548	3.03683	0.00694052	0.0558919
Ano1	1.25485	3.68145	2.51355	3.8006	3.28619	2.08878	1.14	0	1.77934	0	0.266887	0.00695731	0.05599
Zfp59	0	0.169316	0	0	0	1.66721	0.920615	0.671605	0.942967	2.01253	2.31197	0.00696925	0.0560098
Trib2	1.05203	1.50581	0.0291958	0	0.114568	4.0965	2.70739	2.51355	0.56397	2.35956	3.75255	0.00697521	0.0560098
Copa	5.97656	5.97084	6.04223	5.55116	5.63955	4.49975	4.53367	5.28863	4.09614	4.91284	0.444464	0.00697653	0.0560098
Tmc8	0	0.169316	0.360074	1.06169	0.166461	1.24424	1.30669	1.29418	1.96404	1.94362	2.29588	0.0069782	0.0560098
Rpl3	7.78149	8.12182	8.11506	8.28153	8.03914	7.25599	7.02484	6.72669	7.1807	6.75821	0.473512	0.00699069	0.0560731
Dhx58	0	0.169316	0.0702862	0	0	1.73382	0	1.39288	2.15298	2.01129	2.65788	0.00703361	0.0563107
Npw	2.41466	3.23564	0	2.53054	0.853906	0	0	0	0	0	0.285795	0.00703754	0.0563107
Cftr	4.00379	2.93435	3.6121	3.31277	0.917867	1.06939	2.79336	0	0	0.114051	0.22363	0.0070383	0.0563107
Dopey2	3.2237	4.51914	3.29622	4.35401	4.05332	4.67797	5.37261	5.50934	5.02276	5.24135	2.42087	0.00703883	0.0563107
Hist2h2be	3.61562	3.07429	4.46305	0.504394	1.76927	4.65174	4.56252	4.16302	5.21197	5.29355	4.26112	0.00705194	0.0563784
Plagl1	3.96216	3.69243	3.85789	3.97957	3.34315	0	1.8553	0	4.57468	0.0417237	0.180154	0.00707693	0.0565111
Nedd4	9.24005	8.93954	9.6887	8.59881	8.73664	8.55215	7.50006	8.00367	7.31319	7.51849	0.416608	0.00707783	0.0565111
Cxcl12	3.65808	2.54105	0	3.75955	6.36741	0	0	0	1.79286	0	0.133356	0.00708917	0.0565645
Ssrp1	7.65787	7.5728	7.67965	6.90247	7.07998	6.17319	5.9348	6.14936	6.83079	5.94473	0.443811	0.0070953	0.0565763
Gm12942	0	0.169316	1.21858	2.64329	0.435765	1.68752	1.97911	3.07875	3.55557	3.39334	3.5937	0.00710721	0.0566268
Vti1b	4.54442	3.56733	4.44762	5.23376	4.60316	5.89668	5.6798	5.6172	5.70824	5.62138	2.33821	0.00711095	0.0566268
Gnmt	4.04366	5.29355	1.86494	5.10906	2.08462	0.798529	2.51692	2.12424	0	1.09236	0.193077	0.00713127	0.0567514
Cdc45	1.83548	3.37598	1.86423	1.83264	0.593102	0	0	0	0	1.31478	0.32145	0.00714848	0.0568255
Fos	6.21808	6.47881	6.89679	6.41616	6.29901	5.54868	4.2797	0.969527	5.96547	0.926018	0.131772	0.00715274	0.0568255
Zdhhc24	0.518109	0.169316	0.897535	0.693883	0	1.4086	2.3399	1.89704	1.16733	1.53118	2.31826	0.00715459	0.0568255
Spg7	1.21258	2.53149	0.206148	1.7715	2.41656	3.6686	2.96006	2.81546	3.55605	2.8545	2.91456	0.0071595	0.0568273
Dsc2	3.60738	3.21712	3.37964	3.88889	4.18494	5.50934	5.25557	5.08047	4.04455	4.76128	2.4194	0.00716455	0.0568304
Tshz2	2.48888	3.10245	3.21909	3.1196	0	0.971417	0	0.367063	1.02774	0	0.265584	0.00721511	0.0571941
Dnase1l1	3.68001	0.169316	3.37646	1.67778	4.75681	5.51134	5.22118	4.69095	4.88179	4.79241	4.88195	0.00722332	0.0572073
Ears2	2.33155	2.60824	2.26623	2.15371	2.1699	1.46014	1.71874	0.414199	1.31148	0.436125	0.424022	0.00723083	0.0572073
Slc7a3	2.07563	2.29708	1.04564	0	1.90546	0	0	0	0	0	0.362296	0.00723088	0.0572073
Ptgds	2.66656	2.25866	1.24097	0	1.50068	0	0	0	0	0	0.345468	0.00723585	0.0572093
Slc22a18	3.97684	1.87211	3.33249	3.12141	2.78643	4.2981	4.72675	4.7212	4.09818	4.12794	2.59651	0.00726549	0.0574064
Fndc4	3.13645	3.72727	0	2.0764	1.76813	0	0	0.956484	0	0	0.258753	0.00727492	0.0574436
Car9	3.58442	4.02608	5.0404	4.49332	5.97999	0	4.52585	2.37569	0	3.06217	0.161309	0.00730673	0.0576364
Hyi	2.01253	2.08595	0.618151	0.98863	0.944893	2.28987	3.06389	2.34307	2.71532	2.79818	2.48291	0.00730883	0.0576364
Prr13	3.87965	3.42373	3.17561	3.8667	4.01038	4.40685	4.76483	4.83298	4.99737	4.95745	2.17449	0.00733011	0.0577668
2810408I11Rik	0	3.62251	1.24046	1.76514	2.39362	0	0	0	0	0	0.286311	0.00735445	0.057921
Myzap	2.17797	2.1699	0	0	3.53632	2.76184	3.34606	4.44819	3.69466	4.2981	4.38608	0.00737688	0.0580601
Creb3l2	1.31775	2.77513	1.47505	2.32116	2.94628	1.66004	1.01114	0.543204	0	0	0.347673	0.00738541	0.0580897
Rcan1	3.3288	3.01665	0.993543	3.21178	3.15056	1.14507	1.04882	1.14409	1.72357	1.02669	0.348054	0.0073977	0.0581487
Fam132a	1.41582	4.26449	0.38871	3.84103	2.36726	0	1.18486	0	0	0.377447	0.226408	0.00741113	0.0582166
Vta1	1.76927	0.169316	3.27091	2.52964	1.90448	3.44924	2.91155	3.8816	3.75674	4.2287	3.28716	0.00745546	0.058527
Lsm1	1.89787	2.10316	2.05793	2.38901	2.74802	3.26373	3.60921	3.30557	3.16444	3.32463	2.13512	0.00747638	0.0586534
Rab38	0	4.4638	1.60857	0	1.82876	4.62373	4.35401	4.41687	2.91851	3.56733	5.26293	0.00748796	0.0587064
Brms1	3.17164	0.169316	2.88804	3.93239	3.3043	4.52517	4.06044	4.72555	4.89025	5.02338	3.86863	0.0075062	0.0588114
Rpl22	7.22746	7.60729	7.23414	7.42944	7.04979	6.56009	6.12286	5.60564	6.7477	5.11614	0.412042	0.00751839	0.0588691
Zfp87	0.476099	0.169316	0.051471	0.540105	0	1.38454	0.91234	2.03593	1.33084	1.27431	2.20411	0.00753773	0.0589825
Nfia	3.50512	5.07194	2.56687	2.08428	2.08826	1.81702	1.43307	0.934272	0.820818	1.40708	0.291014	0.00755111	0.0590232
Pde4a	3.03003	3.59138	1.64309	2.21885	0	0	0	0.54785	0.586664	0	0.273617	0.00755263	0.0590232
Pyy	7.55983	9.88733	7.30146	0	9.64514	5.9821	1.44295	0.17309	0	0	0.0243636	0.00760195	0.0593704
Ppib	8.54465	9.06786	9.56724	8.57411	9.31739	8.2152	8.19916	7.70499	7.12192	7.67296	0.425903	0.00760858	0.0593841
Sec31a	5.72062	6.49649	5.76325	5.87381	6.11755	4.80806	5.1059	5.24913	4.76672	4.38834	0.456689	0.00765036	0.0596718
Ptp4a3	3.81258	3.76318	4.53797	5.40875	5.09944	3.68321	2.78134	3.3103	3.28233	2.69185	0.385665	0.00766853	0.0597752
Rpl23a	7.7786	8.10565	7.21286	7.93363	7.10317	7.14622	6.53881	5.3101	6.55265	5.61983	0.380703	0.00769246	0.0599234
Pomgnt1	4.40111	3.60446	3.43361	2.88022	3.36535	3.19552	1.55787	2.22821	2.08549	1.78946	0.388062	0.00771702	0.0600761
Pcdh1	2.05284	0.169316	0.376977	0.802557	0	2.26908	2.34735	2.36726	2.12805	1.41244	2.68421	0.00772597	0.0601074
Edem3	3.03615	3.1725	2.9896	3.19775	3.11413	2.23041	2.33405	0.842806	1.76479	2.23489	0.429094	0.00776024	0.0603354
Ccdc174	2.78049	2.45098	2.22676	3.56509	2.46321	4.22751	3.77697	3.54455	4.01299	3.88889	2.28608	0.00778266	0.060461
Aldoa	7.9509	7.71201	8.19916	7.96534	8.3824	8.46482	9.19253	10.0197	8.93954	10.0835	2.45897	0.00778635	0.060461
Echdc1	0	0.169316	1.29523	0	0.628159	4.43763	0	2.51692	3.79381	2.39362	4.62629	0.00780527	0.0605693
Cyr61	3.86766	5.81844	3.73295	5.36743	3.93919	2.11136	1.77453	1.27707	4.95105	1.67081	0.219429	0.007854	0.0608684
Ipo13	1.16649	0.169316	0.0763652	0	2.32677	3.20573	2.13493	1.59106	2.18637	2.84317	3.12631	0.00785603	0.0608684
Pold4	0	3.11848	2.02264	1.84724	2.16352	3.41555	4.21049	3.54408	2.94496	3.42045	3.19702	0.00785884	0.0608684
Lars2	6.72897	7.63554	9.19253	10.4327	8.66792	6.37392	6.08798	5.44914	8.22225	5.09066	0.204938	0.00788756	0.061052
Rpp21	5.43591	6.32568	5.15758	6.28474	5.08437	6.96551	7.85361	6.69158	6.74557	6.65124	2.50333	0.00789467	0.0610682
Apba1	0.660101	0.169316	0	0	0	1.81503	1.48663	1.12772	1.20373	0.835528	2.18532	0.00791239	0.0611664
Mast4	0.698072	3.13369	0.274797	1.72023	1.56381	3.593	2.53256	3.04272	4.21379	2.71597	3.3438	0.00792263	0.0612066
Lamtor1	6.03252	5.21431	6.85451	6.4631	6.59735	7.22567	7.27863	7.69479	7.44473	7.79592	2.38765	0.00794371	0.0613305
Rpp38	5.15509	4.67135	6.31471	5.66344	4.7946	5.4233	2.7924	3.41938	0	2.63083	0.18091	0.00796809	0.0614797
Usp16	6.69316	6.6129	6.35106	5.56987	5.27145	5.52495	4.33936	4.7918	4.59627	4.65998	0.401309	0.00799475	0.0616463
Rgs19	0	3.78481	0.47774	1.70853	2.71248	3.16163	4.52996	3.74478	3.49757	4.05792	4.17466	0.00800082	0.0616539
Snapc3	2.32016	0.169316	3.02333	0	0.241546	2.76811	3.30524	4.99599	2.86782	2.51509	4.40634	0.00800973	0.0616835
Lsm5	6.24511	6.03118	5.87048	6.78386	5.61021	5.76264	5.13624	3.61286	4.26449	4.6176	0.371285	0.00802638	0.0617726
Kirrel2	1.76611	0.169316	1.22182	1.16076	2.06872	0	0	0	0	0	0.412553	0.00804923	0.0619093
Arvcf	2.57327	3.12701	1.41244	2.80164	3.19273	0	1.69474	0	2.18286	0.891751	0.314788	0.00805979	0.0619514
Mal	2.05847	1.90145	2.73416	2.16475	2.09969	1.8689	1.63289	0	0	0	0.35568	0.0081096	0.0622948
Rrm2b	0.769061	0.169316	1.20038	2.05129	1.9351	2.50818	2.59095	3.20742	2.84317	2.00577	2.65014	0.00815446	0.062585
Ccdc28a	2.06279	3.52024	3.84473	2.74546	2.17528	4.11493	3.69243	4.56547	5.0556	4.11096	2.70978	0.00815766	0.062585
Fads2	3.08145	0.169316	3.20986	2.53115	2.978	0	0	1.20038	0	1.39187	0.272531	0.00816711	0.0625864
Sh3bp4	2.62108	2.54566	3.0314	3.34058	1.8938	1.27356	1.01732	2.05489	1.58709	1.29657	0.423191	0.00817119	0.0625864
Tram1	8.7093	8.77482	8.3824	8.32376	8.22624	7.11592	6.57349	7.87094	7.38634	7.62847	0.444954	0.00817329	0.0625864
Ifi27l2a	0	0.169316	2.75916	1.36027	2.96565	2.69155	3.07047	2.90511	4.17887	4.55999	4.08496	0.00820306	0.0627064
Gpbp1	4.00122	2.42183	3.4591	1.82636	4.67601	5.5202	5.25412	4.98949	4.20377	4.892	3.2378	0.00820367	0.0627064
Rassf10	0.910245	1.68935	3.33497	1.15684	1.65619	0.542755	0.750093	0	0	0.0223107	0.35688	0.00820837	0.0627064
Fbxo5	2.04617	3.88029	0	1.72089	2.04815	0	0	0	0.574182	0	0.282385	0.00820959	0.0627064
Dnajc1	5.15987	5.3635	4.69682	6.09349	5.56332	3.68377	4.26491	4.42572	4.4527	4.08077	0.437142	0.00824136	0.0629096
2210013O21Rik	5.16054	3.81988	4.56855	5.43958	5.73466	7.06913	6.19862	6.53881	5.7225	6.21185	2.6455	0.00830251	0.0633366
Dnajc14	0	4.07348	3.51374	1.50531	3.04877	4.93465	4.43219	4.66383	4.50549	4.05237	4.25584	0.00833804	0.0635677
Hexb	4.52659	1.99503	3.69755	1.6994	3.89392	1.68265	2.05213	1.33984	0.851329	1.11477	0.296405	0.00834467	0.0635784
Bmf	2.20893	0.169316	1.8478	1.40644	0.953105	0	0	0	0	0	0.401336	0.00838565	0.0638506
Fbxw8	4.06853	3.82872	3.59238	2.88214	3.72427	1.97696	2.9202	2.29508	1.73382	2.91421	0.420112	0.00840777	0.0639301
1810058I24Rik	6.01529	5.85342	5.93044	5.03642	5.71551	6.81732	6.87427	6.79663	6.91037	6.59735	2.12722	0.00840851	0.0639301
Snora28	0	3.68321	4.19389	5.2668	3.40831	1.06406	0	1.27911	0.951758	1.10065	0.185395	0.00841648	0.0639301
Pink1	4.08594	4.22377	4.94983	4.89977	3.93886	5.0678	5.94741	5.87932	5.43093	5.69334	2.27225	0.00841711	0.0639301
Mir6236	8.05533	9.55173	6.87692	8.51629	5.98363	6.75341	6.25366	3.41993	6.31471	3.07875	0.161244	0.00844168	0.0640615
Nomo1	5.55512	5.53923	5.10487	5.77272	4.53906	0	4.53613	3.83986	3.28078	3.70236	0.213104	0.00844824	0.0640615
Maoa	1.46105	2.05129	0	4.09253	1.78301	0	0	0	0	0	0.272141	0.0084513	0.0640615
Bcl2l11	4.31292	4.25325	4.73564	3.0148	4.26683	2.21914	3.15112	2.38068	3.64465	2.12709	0.375751	0.00845549	0.0640615
Tlr2	0	2.01253	2.21272	0.864108	2.21987	0	0	0	0	0	0.363028	0.00850999	0.0644343
Dbpht2	2.45765	5.27699	2.6149	0	3.21551	1.10983	0.745783	0	0	0	0.197252	0.00851823	0.0644565
Tas2r126	0	0.169316	0	0	0	0	3.22274	3.59765	0.578549	3.14151	4.21119	0.00853234	0.0644745
2810025M15Rik	4.23254	3.14151	4.44122	4.4355	3.33621	5.62907	5.9428	4.87578	4.53841	5.34577	2.5473	0.00853519	0.0644745
Slc30a7	4.15124	4.49117	4.44036	3.50851	3.89459	2.36214	3.37255	2.65624	3.15511	3.08344	0.444028	0.00853651	0.0644745
Marcksl1	5.11553	3.49661	4.48041	4.86815	5.03884	5.65563	5.77338	6.05393	5.66344	6.06822	2.36692	0.0085711	0.0646717
Pdzrn3	0	2.66341	0.0693907	0	1.27356	3.69895	3.28233	2.08183	1.54185	2.73675	3.64791	0.00857325	0.0646717
Got1	2.51077	5.42175	0.688908	3.65179	4.12911	0	0	2.04441	0	1.98757	0.179983	0.00863684	0.065111
Cldn18	2.74174	3.2237	1.71421	3.33032	3.66704	3.75284	5.27625	4.40033	3.84103	4.66352	2.73472	0.00864747	0.0651481
Ngfrap1	7.02765	5.41344	6.51031	5.95949	6.46207	4.51377	5.35063	4.70917	5.55684	4.83499	0.411363	0.00865248	0.0651481
Bckdhb	4.72209	5.0708	3.68001	4.50865	4.49016	2.38391	3.52992	3.42171	3.45114	3.44805	0.421207	0.0086592	0.0651584
Cela3a	9.60608	10.2415	0	9.91496	0	0	0	0	0	0	0.0161479	0.00867779	0.0652578
Rrm2	2.58628	1.68708	0.0641041	1.45907	2.33937	0	0	0.684803	0	0	0.355958	0.00869736	0.0653504
E2f6	2.09916	3.06667	1.32139	2.62609	2.01253	1.47917	0	1.34936	0.845282	0.542755	0.383725	0.00870085	0.0653504
Suclg2	4.17563	3.72066	3.01791	3.5784	3.28918	1.79885	2.62979	2.65258	2.40565	2.50402	0.448078	0.00872877	0.0655197
Akirin1	3.30045	0.169316	2.37974	0.982415	2.48628	2.98387	3.48538	3.91232	3.94029	3.65778	3.32254	0.00874077	0.0655692
Neurod1	4.82538	5.24526	3.05204	0	2.46983	2.18823	0	0	0	0	0.155949	0.00877576	0.0657912
Trim44	6.2746	5.4762	4.7654	4.68623	3.705	4.6479	3.54613	2.66832	2.66456	2.92819	0.309827	0.00878262	0.065802
St3gal5	4.03395	3.24534	1.77279	2.0441	0.128208	0.803643	0	0	0.715155	0	0.260415	0.00879196	0.0658165
Sod3	1.95996	0.169316	1.7526	2.32492	3.63676	0	0	0	0	1.10769	0.297885	0.00879538	0.0658165
Irf2bp2	5.05889	5.37684	5.08351	5.55512	4.47156	4.4769	3.92865	3.37845	4.34717	3.21596	0.423444	0.00880229	0.0658277
Klf6	5.62424	2.62698	4.49478	5.75899	4.86458	6.65124	6.17904	6.16109	6.37139	6.45385	3.22524	0.00883303	0.0659848
Mgmt	1.3421	1.75819	0.321713	2.84401	0.861682	0	0	0	0	0	0.37228	0.00883415	0.0659848
Tagln2	5.66526	6.25853	6.15253	6.33509	5.89465	4.60635	4.59364	4.77994	5.6305	5.05028	0.457209	0.00884914	0.0660562
Mybl2	0.422061	1.46014	1.51462	2.19721	0.656021	0	0	0	0	0	0.420445	0.00886306	0.0661195
Nde1	4.83298	5.06503	3.76801	4.44324	3.33838	3.8503	1.76583	2.77655	0	2.96295	0.246832	0.00886966	0.0661282
Fkbp7	0	3.38297	1.20105	3.00667	3.35311	0	0	0	0	1.07188	0.254479	0.00888114	0.0661732
Sec11c	6.41616	6.81357	5.6534	6.22007	5.54268	7.26415	7.23661	7.45447	7.03065	7.42208	2.22286	0.00889395	0.066196
1810018F18Rik	4.73315	5.0537	2.978	5.79887	0.205742	0	0	0	3.40951	0	0.118916	0.00889509	0.066196
Mvp	0	2.89801	4.02336	4.46928	3.43069	4.43432	5.32169	5.1334	5.58913	5.25412	4.53865	0.00890461	0.0662263
Tmem176b	8.55215	7.89637	8.40052	8.95954	8.49724	8.93954	9.33454	10.5193	9.6277	11.3518	2.81554	0.00891201	0.0662409
Rtn1	3.00909	1.52147	0.940794	1.34936	0.383713	0	0	0	0	0	0.368341	0.00892145	0.0662705
1110038B12Rik	4.16859	6.50367	3.81014	5.45894	5.42785	3.30762	2.94376	3.48389	4.3384	3.13516	0.322625	0.00898483	0.0667006
Rnf121	1.24097	0.169316	0.0834159	1.02393	0.974296	1.84672	2.46144	1.22547	2.13217	2.01279	2.35763	0.00899864	0.0667623
Ctdspl	3.85091	3.81215	1.9449	3.53423	1.57821	1.59701	1.97979	0.30424	1.75819	0.100045	0.287927	0.00900534	0.0667652
Osmr	4.29598	3.76207	0.170493	4.0248	1.47279	0	0	0	0	1.88245	0.193615	0.00901181	0.0667652
Pabpn1	6.22747	6.7607	5.54355	5.62236	4.7097	4.97692	4.39777	3.36422	4.65174	4.27735	0.368783	0.0090155	0.0667652
Peli1	4.43663	3.43708	2.97969	3.92679	3.74615	5.21271	3.95379	5.33508	5.04668	5.6454	2.52007	0.00908658	0.0672507
Cenpa	2.95414	2.95379	4.6526	5.52266	5.13862	2.14531	0	2.49966	2.00962	3.70935	0.221968	0.00909433	0.067267
Polrmt	0	0.169316	2.63631	0	1.67735	2.82491	3.16444	2.86132	2.30839	1.86612	3.26807	0.00910924	0.0673161
Bicd1	2.61187	2.27558	1.81017	0.936739	2.08549	4.42652	3.38197	3.16116	3.06626	2.63535	2.6213	0.00911457	0.0673161
Slco3a1	4.70752	4.44681	1.82103	2.07005	2.47098	5.79577	5.30209	4.46884	5.10261	4.26787	3.69137	0.00912069	0.0673161
Alyref	3.21627	4.32178	2.57566	3.9677	1.86612	2.30006	1.62944	0.360074	1.90352	1.51599	0.319151	0.00912311	0.0673161
Ipo4	3.0945	4.55318	2.56646	3.17657	2.54416	2.2759	1.35801	1.53989	2.42183	0.0469463	0.316776	0.00913083	0.0673322
Setd3	2.52586	3.40831	3.12803	1.67867	1.24313	3.78665	3.48487	4.09358	4.10841	3.62937	2.68287	0.0091369	0.0673362
Hspa14	0	2.01309	0.298213	3.89948	1.46506	3.81988	2.77213	3.82822	3.40497	3.82258	3.98447	0.00916551	0.0675061
Man1a	2.89228	4.30216	4.42927	3.26237	2.76575	5.20493	4.79734	4.44122	5.22311	4.68159	2.53024	0.00920424	0.0677223
Slc16a5	1.47712	3.98125	3.16163	2.25603	0.183294	0	0	0	0	1.29009	0.258127	0.00921084	0.0677223
Svil	2.62979	4.47207	3.99089	3.9626	3.068	4.90982	5.0334	4.98795	4.70752	4.85355	2.41794	0.00921156	0.0677223
Stx12	1.49841	2.33447	3.10023	4.00737	3.16844	4.10618	4.54825	4.00179	4.33994	4.2423	2.68684	0.00921765	0.0677261
Cptp	2.61537	1.54378	4.19158	2.76257	4.30645	3.68196	4.29379	6.04223	5.39034	5.40619	3.67808	0.00928449	0.068176
Med16	2.9255	0.169316	3.19775	2.26237	0.0817876	4.15948	3.67729	4.45442	3.08502	3.16931	3.94974	0.00931639	0.0683689
Uqcc3	7.28207	7.53904	6.39456	5.61983	6.81076	8.8508	8.36433	7.67296	8.06848	7.60245	2.6073	0.00933879	0.0684704
Shisa2	1.80631	2.2114	5.11489	2.06951	0	0	0	0	0	0.246585	0.218984	0.00934435	0.0684704
Nat8	3.25165	2.11417	0.690898	3.51454	0	0	0	0	0	0	0.26531	0.00935052	0.0684704
Rassf4	3.91161	0.169316	2.51839	0	0.310064	4.31841	3.41314	3.25545	4.52713	2.68014	4.77988	0.00935506	0.0684704
1700086L19Rik	6.08648	7.59098	4.69562	0	5.40619	4.49726	0	0	0	0	0.069041	0.00935837	0.0684704
Ddo	1.69137	2.73169	0.89964	3.14151	3.94029	3.24572	4.52035	4.46669	4.3354	4.35508	3.25746	0.00937749	0.0684976
Hspa9	7.44755	7.70499	7.0882	7.22254	7.06593	6.00466	6.24719	6.47881	6.13374	6.4631	0.486212	0.00937911	0.0684976
Slc46a1	1.53786	2.89947	0.306455	4.12068	2.47361	0	0	0	1.54673	0	0.257337	0.0093858	0.0684976
Mgst1	9.55173	8.36433	9.50693	9.41691	8.77482	6.7607	7.97895	8.17577	7.14188	8.61519	0.381976	0.00938691	0.0684976
Hspa5	8.68936	8.86052	8.32376	7.79169	8.87988	7.64057	6.742	7.32808	6.78849	7.92826	0.428224	0.00939025	0.0684976
Pnlip	11.851	12.0417	8.01032	11.5288	11.0336	9.12543	8.93147	3.57494	9.79261	3.88972	0.070304	0.00939965	0.068525
Gpatch11	2.66917	0.169316	2.02648	0.671012	2.2135	3.35166	3.59138	3.21331	2.33538	3.17389	2.9964	0.00943651	0.0687525
Sepn1	2.01166	2.5708	4.14966	2.23854	0.43812	0	0	0	1.81055	0	0.26432	0.00944717	0.068789
Arg1	1.63405	0.169316	3.99418	1.37716	2.48474	0.578549	0	0	0	0	0.283972	0.00951053	0.0692088
Ufd1l	3.38762	1.92636	3.27623	2.95519	2.97493	4.36651	4.45562	4.03947	3.88508	3.74746	2.28907	0.00953961	0.0693522
Atg4a	2.22012	1.82636	1.14622	2.22168	1.99925	3.90836	3.00417	3.1745	2.11445	3.90903	2.53042	0.00954163	0.0693522
Nfatc1	3.42778	3.50406	3.37444	1.81561	2.60963	4.78307	4.54254	3.90417	4.15485	3.89898	2.48014	0.00956046	0.0694476
Chmp2a	7.37886	7.0728	6.98511	7.34574	7.27863	8.76717	8.68316	7.7786	8.24973	8.01435	2.1234	0.00961457	0.0697635
Ndufb8	9.67338	9.39544	8.5588	8.83865	8.82548	12.3162	11.3518	9.88733	9.56724	10.2791	3.07796	0.00961543	0.0697635
Tmem127	2.12099	0.169316	3.08344	2.50619	3.80844	4.77753	4.68776	3.86517	3.54104	4.00297	3.57321	0.00962279	0.0697752
Abca3	2.77872	4.39374	3.37598	3.221	3.83408	4.95745	5.24054	4.51779	4.67708	4.35559	2.34402	0.00963642	0.0698324
6430548M08Rik	1.81392	2.97969	2.26394	1.63726	1.03042	0	1.74455	0	0	0.590411	0.358973	0.00964806	0.0698752
Gnb2l1	8.50712	8.58671	7.93363	8.56576	8.2152	7.81703	7.37059	6.57932	7.55983	6.54225	0.438948	0.00966555	0.0699602
Trappc2l	5.62236	5.96375	4.57763	4.1051	4.73022	7.76835	7.33173	6.03519	5.61172	6.22455	3.01989	0.00967714	0.0700024
Lcor	0	0.169316	2.11245	0	3.09021	2.49843	4.31735	3.09056	2.01166	3.71709	4.14859	0.00970694	0.0701762
Glmp	4.74809	4.01765	5.7225	5.39421	5.61298	5.91319	6.2528	6.88622	6.44297	6.41901	2.43472	0.00972544	0.0702682
Pld2	3.28107	1.91509	2.79362	4.36787	1.21139	3.63969	4.4425	4.61534	4.90528	4.41415	3.22563	0.0097416	0.070288
9030624J02Rik	3.33385	2.0471	2.71686	1.82685	3.71043	3.76268	4.10297	4.25325	3.58442	5.14588	2.71852	0.00974175	0.070288
Scamp2	4.84698	4.47309	5.80508	5.28447	5.51306	6.70107	6.47881	6.21667	6.28688	6.00813	2.22496	0.00974552	0.070288
Zdhhc3	3.24534	2.40432	3.10498	3.01709	3.27311	4.64661	4.2287	4.30404	3.48794	4.03897	2.19206	0.00975773	0.0703343
Pdgfa	2.34307	3.22756	4.31652	3.93696	3.63297	1.81926	2.11713	2.52806	1.19521	2.73843	0.375843	0.00978107	0.0704499
Lpgat1	1.40528	3.86162	1.75845	2.56827	2.22821	0.545236	1.03042	0.323264	1.66634	0.771023	0.354262	0.00978535	0.0704499
Osbpl3	2.55334	2.02575	0.0445689	3.22478	3.08145	4.16583	4.07006	3.41077	3.94554	3.82732	3.24434	0.00982531	0.0706957
Sec13	6.129	5.3997	5.9611	5.49451	5.97084	3.24804	3.6306	5.0708	5.1248	4.92685	0.38135	0.00988241	0.0710645
Prss2	13.1051	13.2749	12.5335	13.2749	13.1051	11.5667	11.2135	7.76835	12.8558	6.13928	0.112657	0.00991752	0.0712748
Sirt4	0	0.169316	2.35786	0	2.28348	1.85033	2.52169	3.07202	3.85901	2.54701	3.50127	0.00996097	0.0715048
Itga6	5.28154	5.60795	4.14996	4.14484	4.57424	3.85278	3.5944	2.7267	3.92865	3.10023	0.402997	0.00996183	0.0715048
Pllp	0	0.169316	3.08502	1.88928	2.49742	2.54929	3.42469	4.39996	3.21976	3.47255	3.69364	0.00996715	0.0715048
Sec61g	5.9611	6.03598	4.94157	5.73672	5.02201	5.00453	4.55513	3.29495	4.46928	3.75955	0.399761	0.00997457	0.0715158
Zfand5	3.66208	3.99089	4.73844	4.18835	3.45114	5.30013	4.892	5.23285	4.97358	5.2054	2.16537	0.00999288	0.0715597
Samm50	2.56233	2.87863	3.38228	4.22694	4.02307	4.20439	4.62678	4.73844	4.7882	5.04714	2.40551	0.00999416	0.0715597
Ttc22	0.764977	0.169316	1.25911	1.21093	3.19242	2.7437	2.1662	4.28921	3.47047	2.7374	3.39178	0.00999835	0.0715597
Ubald2	2.91726	3.47115	3.72365	3.2694	3.53423	4.53476	4.12199	4.50209	4.60191	4.33968	2.05188	0.0100288	0.0716736
Simc1	1.06351	0.169316	1.27973	3.06353	1.89005	0	0	0	0	0.038422	0.357114	0.0100322	0.0716736
Efcab2	1.08722	0.169316	0.854674	1.05203	0.238031	3.18355	2.07239	0.723877	2.21022	2.30813	2.67471	0.0100354	0.0716736
Mxd1	3.84543	1.60857	3.71266	3.38102	0.255263	4.0797	5.67724	4.55999	4.35146	4.26998	4.0758	0.0100416	0.0716736
Mir703	9.26614	9.46472	8.78592	9.24005	8.58671	8.75824	7.79592	6.88039	8.24265	6.8436	0.388356	0.0100437	0.0716736
Camta2	1.14507	2.42542	1.81746	2.16752	1.38715	4.06166	3.70426	3.1369	3.66827	1.73382	2.77494	0.0100637	0.0717599
Vtcn1	2.03243	4.03299	5.17983	5.28298	3.86808	3.86067	0	0	3.23628	0	0.158233	0.0100685	0.0717599
2410002F23Rik	3.86623	3.76436	3.69282	3.75125	3.51515	2.08595	3.03741	2.80357	2.93819	2.43683	0.48044	0.0100735	0.0717599
Snapc5	4.97069	3.58208	4.46993	4.36696	4.79631	6.09126	6.49843	5.31184	5.87048	4.90388	2.45886	0.0101505	0.0722437
Pak6	1.22286	2.10789	0.47466	2.84532	0.558476	0	0	0	0	0	0.368097	0.0101533	0.0722437
Dclre1b	0.473188	0.169316	0.0177501	1.80982	1.88207	2.6384	2.13582	2.36407	1.67545	2.6166	2.66778	0.0101991	0.0725269
Zfp930	3.31645	0.169316	0.580427	1.67545	0.578549	2.33124	3.65179	3.2373	2.78049	2.96006	3.313	0.0102359	0.0727463
Cdv3	3.75125	3.76801	3.21041	4.27237	3.09936	2.14623	2.96985	2.13856	2.8966	2.03773	0.440592	0.0102712	0.0728362
Plk2	5.50606	4.52585	5.55215	4.33036	4.80051	5.67002	5.95856	6.41371	6.18356	6.33825	2.24986	0.0102739	0.0728362
Gm20257	0	0.169316	4.25181	1.50293	3.00958	4.87231	3.27791	4.32768	4.34526	3.42806	4.80161	0.010277	0.0728362
Klhl17	2.26355	2.42779	2.21987	1.75819	1.25571	1.57085	1.16028	0.457595	0	0.373978	0.413947	0.0102779	0.0728362
Hsbp1l1	4.74039	3.82203	2.99112	5.40619	3.41077	5.39703	5.40875	5.2054	6.01082	5.58495	2.72695	0.0102785	0.0728362
Glmn	0	0.169316	2.41572	0	0.649409	2.66755	4.02046	1.60526	1.33184	2.71894	3.53552	0.0103274	0.07314
Gmppa	4.4519	5.44539	5.99443	5.08437	6.24887	3.82822	4.29028	4.31782	3.64231	4.67916	0.407979	0.010382	0.0734837
Wdr47	1.76244	0.169316	1.32379	0	2.09695	1.94114	2.37081	3.16048	2.12948	3.43775	2.90278	0.010393	0.0735191
Rnf145	3.39195	0.169316	3.33838	2.448	4.82638	4.86078	4.64846	5.35943	5.32725	4.38753	4.2336	0.0104494	0.0738751
Gng4	6.293	5.6812	5.35135	0	4.31562	4.33384	0	0	0	0	0.090781	0.0104574	0.0738887
BC031181	5.03095	4.11493	4.34526	3.86517	4.68045	5.31561	5.67627	5.51306	5.36067	5.5843	2.11789	0.0104735	0.0739593
Cchcr1	1.13698	0.169316	1.24804	2.00808	2.02049	0	0	0	0	0.314348	0.419368	0.0104955	0.0740714
Pbxip1	5.44102	3.77345	5.74241	6.14485	4.96575	6.91522	6.67227	5.8909	7.44036	6.51594	2.77683	0.0105533	0.0744363
Atp6ap1	3.9626	4.24851	3.12551	3.90903	2.17824	4.83951	4.51443	5.18783	4.39011	5.31311	2.57437	0.0105598	0.074439
Gm3716	1.50293	1.63078	0.239565	0	0.344997	2.19697	2.62457	1.64629	2.00808	1.77453	2.47329	0.010599	0.0746716
Bcl6	2.51547	3.32823	0.95373	2.21022	0.905409	0	0	0	1.6565	0.0641041	0.321193	0.0106109	0.0747126
Acss2	2.96503	0.169316	3.31197	0	0.108586	3.32076	3.14449	4.05284	3.82427	2.59362	4.21699	0.010673	0.0750655
Prob1	4.48273	4.87748	0	5.15346	0.0603592	0	0	0	0	0	0.132604	0.0106769	0.0750655
Acpp	0	1.71046	0.511952	1.15035	0.269498	2.52999	2.90316	2.04194	1.92309	1.15456	2.60647	0.0106795	0.0750655
Galnt2	3.4459	4.56671	4.07581	4.62183	2.76211	2.61537	3.80365	1.47712	2.05793	0.428274	0.283613	0.0107192	0.075246
Maged2	6.53193	4.40935	5.08734	2.49929	5.89962	2.59572	1.8805	3.72318	2.5783	3.47596	0.244046	0.0107259	0.075246
Ica1	4.26858	4.11639	3.87548	4.36476	4.87748	3.40434	3.70579	3.41219	1.82449	2.65759	0.406222	0.0107277	0.075246
Polr3h	2.88214	2.65997	2.21022	3.18575	3.21482	2.00064	1.4086	0.678749	1.83506	2.15493	0.430779	0.0107351	0.075246
4930579K19Rik	0	0.169316	1.8938	0	0.167172	3.11762	2.55735	1.63131	0.661054	2.31231	3.05224	0.0107362	0.075246
Hells	2.50402	2.03825	0.418352	1.449	2.931	0	0.982415	0	0.852313	0.0747902	0.356947	0.0107508	0.0753049
Arhgef3	1.5767	0.169316	2.51873	2.69388	3.98208	0.770219	0	0.975337	0	0.0922245	0.283106	0.0107913	0.0754403
Tcf7l1	2.59	3.09936	0	0	0	3.48818	3.2857	2.92227	3.97684	2.12274	4.05942	0.0107919	0.0754403
Ppp1r14d	0.684803	0.169316	0.228891	0	0	1.14452	2.15493	1.37567	2.25983	0.459596	2.39879	0.0108004	0.0754403
Hspa4l	2.92447	3.84103	0	2.09549	3.6169	4.62622	5.05028	4.13224	3.77447	4.60635	3.84327	0.0108056	0.0754403
Ggta1	4.43914	0.169316	2.6641	5.85213	5.09066	2.73891	0	1.26943	0	0	0.139525	0.0108067	0.0754403
Mthfd1	3.26287	5.60896	3.27311	5.14148	2.88083	3.46732	0	3.39446	0	1.25362	0.188107	0.0108073	0.0754403
Apeh	1.37847	1.95649	1.78149	2.32677	2.71442	2.94994	2.93331	3.52446	3.17164	3.16609	2.1698	0.0108494	0.0756637
Cdkn1c	3.58839	4.10127	3.17132	1.78618	5.23058	2.42672	1.47505	0.333175	2.92996	0.888407	0.25616	0.0108518	0.0756637
Plekha2	3.28981	2.2005	1.60591	1.44061	4.41659	4.84003	4.35838	4.05686	3.92602	4.04856	3.14986	0.0108695	0.0757438
Srp68	5.72417	6.63542	5.69516	5.53923	5.69065	3.02041	4.87002	5.50291	4.09397	4.63609	0.370553	0.0109096	0.0759799
Acvr1c	3.4169	3.46945	0	0.637341	3.40713	0.694983	0	0	0	0	0.241958	0.0109187	0.0759998
Tmem30b	2.3987	2.93819	3.49994	3.09056	2.03384	4.75559	3.11219	4.57109	4.03468	4.01476	2.47155	0.0109316	0.0760389
Bdh2	3.27581	0.169316	3.29541	2.97097	4.04268	0	0	0	1.94362	1.46669	0.238362	0.0109368	0.0760389
Slc35a3	2.07734	1.71183	4.07006	2.07734	2.31492	3.86204	4.57327	4.73716	2.61924	4.66184	3.11755	0.0109685	0.0761828
Uba3	6.68716	6.9555	5.96746	5.87048	7.44036	5.35135	4.75481	5.70419	4.5475	5.93212	0.398818	0.0109701	0.0761828
Creg1	4.64908	3.40334	4.61919	4.90982	4.14424	1.79807	3.15	2.89625	3.916	3.07114	0.384527	0.0110081	0.0764035
Creld2	5.62976	6.62597	4.95792	4.43996	5.6798	3.4947	4.19975	4.23042	3.82038	4.74918	0.387482	0.0110303	0.0765135
Nop9	1.39288	2.40128	2.64659	2.69449	2.74546	3.70048	3.8674	3.6121	2.97259	3.56998	2.24758	0.0110498	0.0765616
Rhbdl2	2.69495	2.73626	1.30978	2.77655	0	1.03775	0	0	0	0.204051	0.317505	0.0110527	0.0765616
Ndufa1	5.97857	6.47253	5.62686	5.96746	5.12128	7.92826	7.61567	6.50057	6.65996	6.78021	2.40093	0.0110561	0.0765616
Fhl1	3.03909	5.13915	3.26872	0	3.21821	1.469	1.64827	0	0	0	0.201719	0.0111426	0.0771166
Rtcb	4.11556	4.79324	4.65543	4.40685	4.6502	3.21423	3.22478	3.99089	3.18575	3.72318	0.480801	0.0111823	0.0773474
Siae	3.62837	2.78597	3.4127	3.51954	3.64231	5.13799	3.31381	4.7341	5.12537	5.22237	2.47761	0.0112073	0.0774759
Gas5	5.61021	6.29061	6.29501	5.92023	5.60896	4.96575	5.179	4.14584	5.30492	4.49548	0.457928	0.0112454	0.0776956
Frmd6	0.793481	1.88736	0.178764	2.53426	2.86649	0	0	0	0.587848	0	0.345199	0.0112704	0.0778242
Tcta	0	1.78657	4.892	4.04654	5.50444	5.13915	5.65487	7.06913	5.12257	6.90247	6.64251	0.0112934	0.0778561
BC052040	0.573621	3.51639	4.19769	4.10408	4.02548	0	1.83245	0	0	2.95811	0.199527	0.0112937	0.0778561
Nsdhl	1.69411	0.169316	2.39362	4.09061	2.77056	2.56545	4.62622	5.41179	3.8006	5.70684	4.59014	0.0112943	0.0778561
Gimap5	0	0.169316	0	3.6062	1.91078	1.17383	3.5034	4.15321	4.9046	3.91451	5.25122	0.0113323	0.0780742
Usp49	0	0.169316	3.1539	2.02421	2.99014	3.76046	2.8327	3.58364	4.41415	3.32235	3.77153	0.0113595	0.0782169
Gpt	2.66043	3.27311	1.99133	2.86208	1.12063	1.32492	1.57085	0.311829	1.32819	0.0518466	0.36249	0.0113705	0.0782292
Ccdc32	1.29059	0.169316	3.34315	1.25362	2.40105	3.27311	3.588	2.86026	2.90964	4.09397	3.14585	0.0113741	0.0782292
Pik3cg	2.38694	1.91264	0.0046598	0	2.7374	3.52638	1.253	3.56267	5.59882	5.2031	5.35344	0.011407	0.0783877
Larp1b	2.29609	2.19874	0.990168	1.32436	0.2106	3.66344	3.39195	2.45765	2.53471	2.23744	2.73786	0.01141	0.0783877
Vps45	1.73155	0.169316	2.45423	0	2.96432	2.52964	3.53677	3.46595	3.27364	3.09737	3.28705	0.0114176	0.0783953
Rpl18a	7.97349	8.04794	8.0974	8.36433	8.05533	7.1394	7.47061	6.76786	7.34574	6.75341	0.495757	0.0114693	0.0787056
Tuba1c	5.66176	5.38148	5.48126	3.85091	6.09263	6.15104	6.34112	7.00993	6.65338	7.06593	2.55031	0.0114813	0.0787108
Lzts3	3.38733	1.92549	3.94702	0.709653	1.12413	4.44493	3.59612	3.79295	4.4201	3.71846	3.42426	0.0114875	0.0787108
Ttll11	0	0.169316	0	0	0	0	2.82541	1.90664	0.683955	2.87385	3.08251	0.0114894	0.0787108
Wdr90	1.4624	1.9219	1.47846	0	2.18933	0	0	0	0.528077	0	0.404776	0.0114993	0.078734
Ttll5	0.430906	0.169316	0.00609186	0	0	2.66341	2.35013	0.199141	1.01286	1.41743	2.65246	0.0115392	0.0789628
Mcoln1	1.54232	0.169316	2.80954	3.54332	3.23045	4.55617	3.17983	3.80598	4.61196	4.23962	3.53013	0.0115556	0.0790208
Ccnt2	0.865649	0.169316	2.40873	2.46239	2.83086	2.96707	3.4803	3.10101	4.07116	3.06239	3.0084	0.0115607	0.0790208
Isoc1	3.06389	3.87501	4.2417	4.812	4.78904	5.88246	6.03598	5.66412	5.35217	4.55859	2.53562	0.0115695	0.0790363
Fads3	2.9578	1.8206	2.73675	4.51313	0	0	0	1.62271	0	0	0.236332	0.0116151	0.0793035
Ap3s1	5.68783	6.23101	4.7475	5.69725	4.94897	3.37547	4.71128	4.57395	4.27882	4.13418	0.421098	0.0116365	0.0793791
Grb10	6.08972	0.169316	3.46945	4.87667	4.63532	0	0	1.87814	2.71104	0.723877	0.145039	0.0116445	0.0793791
Pknox1	1.38928	0.169316	0.0214689	0	0.202002	1.03189	1.79589	2.35688	1.10983	1.72122	2.37303	0.0116457	0.0793791
Bloc1s2	4.00042	3.67157	3.36936	3.04877	4.20439	4.42313	4.91574	4.70643	4.73642	4.87437	2.1028	0.0116765	0.0795397
St3gal4	5.54355	4.71128	5.58796	7.13405	3.90684	3.3669	3.29151	4.32547	3.45657	4.27182	0.32213	0.0116871	0.0795397
Eapp	4.17353	3.96967	4.18411	3.10245	6.01656	6.11853	6.63439	5.75275	4.823	6.08972	3.01972	0.0116926	0.0795397
B3gat3	1.54881	2.31816	1.67081	2.18193	1.32436	3.23491	3.25069	3.20573	2.14029	2.92409	2.20737	0.0116955	0.0795397
Snora68	4.8249	3.57541	4.37324	2.07239	4.4519	0.695703	4.28532	0	1.14409	1.97375	0.211716	0.0117188	0.0796155
Agl	3.41363	1.90933	2.60062	3.18715	2.36978	4.72492	4.39731	3.25219	4.52035	3.29151	2.53355	0.0117245	0.0796155
Trim14	2.33671	2.69232	1.77378	3.42806	2.36574	3.87068	3.16524	3.86808	3.51322	4.11639	2.27742	0.0117379	0.0796155
Arhgef19	1.37614	1.72466	2.7887	3.57734	0.731762	1.73191	0	0	0	0	0.30921	0.0117387	0.0796155
Pdap1	4.79631	5.85289	4.99287	5.30761	5.17141	4.63758	3.82872	3.95433	4.25914	4.07426	0.475195	0.0117441	0.0796155
Sapcd2	2.08917	0.169316	3.25165	1.08871	1.04564	0	0	0	0	0	0.346542	0.0117459	0.0796155
Disp2	3.09841	5.06012	1.82449	0	1.06169	0	0	0	0	0	0.216293	0.0117738	0.0797599
Zfp937	2.51692	2.06183	2.77689	2.40791	0.121176	1.06351	0	0	0.873012	0.314792	0.347074	0.0118024	0.0799093
Gsap	0.715747	0.169316	0.764977	0.47774	0	0	3.37031	4.55241	1.27173	5.10906	5.40819	0.0118648	0.0802781
Epb4.1l2	0	0.169316	1.9079	3.52638	1.21858	3.59397	3.30388	2.61457	2.94742	3.29117	3.44802	0.0118701	0.0802781
Cdkn2d	0	0.169316	0	0	0	2.17824	0	2.5708	1.24658	1.12872	2.62261	0.0118845	0.0803164
Gcsh	3.64988	3.1778	2.18933	3.69282	2.85221	1.25851	1.88325	1.55339	1.96212	2.64944	0.420137	0.0118944	0.0803164
Hid1	4.08236	4.77526	4.63583	4.48093	4.99287	3.50886	2.91322	4.21421	3.13229	3.59138	0.459629	0.0118955	0.0803164
Tmem39a	5.26131	4.66689	3.62624	2.41115	4.98081	1.11337	2.5204	3.13975	1.39983	3.48864	0.276072	0.011926	0.0804771
Edaradd	1.16733	2.59856	2.19214	0.538299	0.379293	0	0	0	0	0	0.385519	0.01195	0.0805949
Snapc4	2.97419	0.169316	3.1484	3.05443	3.66827	1.39222	1.71046	0.51152	0	0	0.271669	0.0119633	0.0806394
3110057O12Rik	0	2.47407	0	0	0.129061	2.69185	3.75916	3.52158	0	3.34124	4.41416	0.0119996	0.0808397
1810037I17Rik	6.6295	7.18835	5.17649	6.01312	5.79577	7.75446	7.72637	6.88385	7.60245	7.242	2.43037	0.0120194	0.0809275
Patz1	2.10494	3.40054	3.85091	0.924694	2.53391	4.31437	4.77845	3.52055	4.38315	3.73992	2.9986	0.012026	0.0809275
Adgrl2	2.94873	3.28078	4.36088	4.50789	4.14364	1.75845	2.25442	2.39561	3.29151	2.93883	0.400364	0.0120345	0.0809399
Crebrf	3.44066	2.46768	2.75989	1.76583	1.66884	4.58934	3.27311	3.36259	4.72492	3.2489	2.67436	0.0120509	0.0810054
Tmed2	7.06593	7.31951	8.0346	7.29021	8.25624	5.13067	6.3427	7.13741	5.51086	6.8988	0.381774	0.0121142	0.0813858
Prnp	4.66059	4.08836	4.52996	0	5.35438	0.762548	0	0	1.50048	2.96809	0.155994	0.0121336	0.0814712
2019-03-02	4.81607	4.79734	4.91837	4.43219	4.41142	5.54268	6.10576	5.42912	5.62236	5.66344	1.99666	0.012175	0.0817041
Tmem208	6.93864	7.57984	6.52914	6.94207	6.2746	8.71432	8.35412	7.80967	7.51849	7.72637	2.25283	0.0122449	0.0820985
Etv5	2.41782	4.3373	3.76046	2.6529	2.6641	3.20652	2.13825	0	0.990168	0	0.268031	0.0122473	0.0820985
Gtf3c5	5.4762	4.53087	5.06503	4.11361	5.87511	2.63594	1.70889	4.88816	2.45266	4.34717	0.286062	0.0122634	0.0821614
Vamp2	3.67951	2.76321	2.81686	1.16816	2.94783	3.66208	3.92438	4.8249	3.98005	3.9494	2.62633	0.0122777	0.0821705
Dctn4	3.01426	3.31323	2.5816	2.38659	3.10023	4.01083	3.66121	3.95058	4.40201	3.65179	2.0793	0.0122783	0.0821705
Usp40	0	1.91138	1.55787	1.40528	0	3.81539	3.78712	1.80756	3.39334	1.14	3.51561	0.0123122	0.0823105
Gmppb	4.68623	4.67426	5.26318	4.67916	5.28068	4.36308	1.90508	4.35653	2.43112	3.89485	0.347102	0.0123134	0.0823105
Snhg1	2.78973	3.12348	1.38409	3.11907	1.68572	1.41641	1.18684	1.18218	1.02845	0.960638	0.415951	0.0123195	0.0823105
Agpat2	3.16354	1.85938	3.37547	3.8063	0.910245	4.26926	4.58934	4.31126	3.49213	4.41934	3.01735	0.0123263	0.0823109
Anxa6	5.94741	4.23834	5.66176	5.51934	6.18535	3.39963	4.44681	4.68623	4.21082	4.29379	0.405287	0.0123437	0.0823583
Olfm4	0	0.169316	4.55669	3.14288	4.73208	0	0	0	0	0	0.174319	0.012362	0.0823583
Ppip5k2	2.80409	3.35798	3.77226	3.78783	1.20456	4.41934	4.0476	4.65106	4.51746	4.54674	2.73416	0.012366	0.0823583
Ipmk	0.932646	2.70076	2.5448	2.16811	1.30575	3.6067	3.58839	2.58284	2.98089	3.38297	2.45878	0.0123666	0.0823583
Trp53i13	2.08095	1.93167	0.819525	1.94678	1.29698	1.58919	0	0	0	0	0.406875	0.0123673	0.0823583
Zfp651	0	2.60248	0.389206	3.16672	2.42851	0	0	0	0	0	0.3041	0.0123797	0.0823956
Isl1	6.09263	4.59183	5.17519	0	2.2759	2.43073	1.24733	0	0	0	0.134764	0.0124039	0.0825116
Slc39a8	3.52088	0.169316	2.72319	1.80221	4.30172	4.63906	3.41555	4.63807	4.68045	4.99737	3.91941	0.0124184	0.0825629
Ola1	5.6798	4.65726	3.63344	5.05644	4.80463	3.63741	2.00925	3.66904	2.46381	4.34359	0.343482	0.0124262	0.0825695
Ginm1	3.01961	0.169316	6.16915	1.7368	5.07374	5.32169	5.39102	6.04594	6.3427	6.54055	6.474	0.0124341	0.0825768
Mtmr9	2.85931	0.169316	2.89091	0	0	3.68653	2.78683	4.10365	2.59499	2.53632	3.88457	0.0124546	0.0826682
Gspt1	4.7578	5.71452	5.11897	4.67601	4.95745	4.12693	4.23702	3.79459	3.1722	4.29123	0.459917	0.0124669	0.0827043
Gpd1	1.13381	2.21885	2.34844	1.84441	1.54952	2.43342	3.12348	3.66704	2.56646	3.14967	2.24857	0.0125044	0.0829082
Mtap	0.901528	3.14736	2.14677	2.75041	2.84805	0.700302	0	2.22586	0	0.916737	0.332115	0.0125392	0.0830366
Nbeal2	1.62873	2.50734	1.84628	1.92355	2.1728	2.98789	4.40415	2.54161	3.29811	2.94456	2.3287	0.012542	0.0830366
Nars	6.05962	6.50831	5.6682	4.88522	6.2348	4.98949	5.06106	4.4854	3.64909	4.8309	0.415222	0.0125443	0.0830366
3110079O15Rik	4.24696	4.30705	0	3.80008	0	0	0	0	0	0	0.180389	0.0125877	0.0832785
Gata5	0	0.169316	5.83511	3.67487	3.01709	5.38815	4.96198	5.94949	4.39894	5.68608	6.66985	0.012603	0.0833346
Hacl1	0	0.169316	1.64403	0	0	1.81125	0	2.55483	3.46632	3.03283	3.50734	0.0126711	0.0837006
Ankrd13b	3.05352	4.67864	1.68708	2.96112	1.61927	0	0	1.39459	2.68323	0	0.252725	0.0126721	0.0837006
Vps13d	1.68645	4.4302	1.81969	2.62864	2.17431	3.25038	4.78545	5.26633	3.57096	4.2767	3.20896	0.0127047	0.0838705
Plxna3	4.7186	3.77992	2.54973	2.24348	0.938607	1.51296	1.3906	0	1.66562	0	0.262023	0.0127157	0.0838973
A330102I10Rik	0	0.169316	0.617678	0	0	2.15098	1.32877	0.835528	2.17749	0.473188	2.35511	0.0127235	0.0839032
Oscp1	1.78044	3.15257	1.42663	0	2.75794	0	1.01883	0	0	0	0.325392	0.0127788	0.0842208
Slc37a1	0.710824	0.169316	3.40302	2.87798	1.96604	2.68854	3.50706	3.98892	3.99346	3.72836	3.37721	0.0127855	0.0842208
Fance	2.89562	3.37547	3.67012	3.31197	3.5015	1.38057	0	2.00884	2.20778	3.3265	0.337697	0.0127959	0.0842434
Tnfrsf12a	4.34095	4.50549	3.69683	6.14217	5.06414	0	3.26982	1.26406	5.21113	2.03011	0.190137	0.0128222	0.084371
Gsdmd	0	0.169316	1.31387	1.28105	0.067452	2.08529	1.54273	2.069	1.14622	2.10426	2.33458	0.012849	0.0845017
Rpl17	6.01858	6.19862	4.86815	6.08455	5.00844	5.12788	4.79103	3.52024	4.50909	3.35118	0.385343	0.0129453	0.0850891
Atg14	0	1.63462	0.175054	0.52481	1.25851	2.02349	1.53249	2.42317	1.41927	2.53978	2.41002	0.0129593	0.085115
Adgrf1	1.75577	0.169316	0.368536	2.8242	2.64792	0	0	0	0	0	0.340765	0.0129632	0.085115
Bcam	0.628159	1.87396	3.89485	2.5337	2.79969	0	0.878667	1.72178	0.554674	0.252295	0.315434	0.0129957	0.0852823
Gstm4	1.66836	2.11187	4.36155	3.2373	2.6051	4.22948	4.58512	4.59627	4.86937	3.33249	2.87929	0.0130166	0.0853729
Casc4	1.60697	4.97988	0.805743	2.01593	1.88116	0	0	0.385903	1.26749	0	0.262928	0.0130485	0.0855363
4930415O20Rik	4.44989	5.53859	0	2.56172	2.49026	0	1.78197	0.806761	0	0.239139	0.183962	0.0130755	0.0856671
Ppip5k1	1.21627	0.169316	1.54477	0	0	2.32763	1.59944	1.68752	1.85473	1.5702	2.33243	0.0130933	0.0857374
6330418K02Rik	0	0.169316	1.19882	0	1.00218	1.47172	2.82351	0.386636	2.71336	2.52383	2.8476	0.0131238	0.0858908
Aplp1	3.59099	4.38486	1.83746	1.47548	2.70132	1.19595	1.49716	2.24532	0	0	0.285125	0.0131677	0.0861321
Galnt6	0.443599	3.07562	3.73771	2.04369	2.6149	0	0	0	1.10258	1.90664	0.290929	0.013272	0.0867676
Tmprss2	1.89485	4.32444	5.67486	4.64427	4.54369	6.01312	5.73559	5.35668	6.32726	6.25366	3.29628	0.0133096	0.0869666
Gigyf2	5.95703	5.03729	5.29691	5.16181	3.03942	4.24741	2.69574	3.40831	2.84902	3.50109	0.33958	0.013335	0.0870513
Klhdc3	2.72319	0.169316	3.78594	2.23236	3.72665	3.63636	3.75369	5.15433	4.39138	5.11418	3.68713	0.0133369	0.0870513
Hist1h2ao	4.72492	3.70236	2.13856	2.08061	3.52247	1.86851	1.92309	0.553767	2.60288	0.812699	0.311738	0.0133718	0.0872322
Tmem30a	5.17071	4.46624	6.35789	5.22514	6.17904	7.29644	6.69158	6.60364	6.35106	6.72669	2.38515	0.0133808	0.0872441
Ano9	0	2.02876	2.05457	2.09489	2.11368	0	0	0	0.829171	0.632937	0.387977	0.0133914	0.0872666
Rpp40	1.92052	0.169316	2.12457	1.43972	1.0837	0	0	0.40223	0	0.265426	0.431062	0.0134235	0.0874071
Atp6v1e1	5.67724	5.9077	5.08917	4.53693	4.92983	5.92543	6.6177	6.51031	6.10433	6.56536	2.16813	0.0134376	0.0874071
Yeats2	2.76321	3.89437	2.69892	1.43803	2.0252	1.18156	0.942428	1.98604	1.10579	0.656588	0.381707	0.0134376	0.0874071
Baiap2	1.91677	2.37312	2.29609	3.46162	2.43292	0	1.36938	1.84073	1.98727	0	0.364344	0.0134417	0.0874071
Sema3f	2.53256	1.83459	1.93582	3.36104	2.37274	1.9683	1.25783	0.911055	1.33359	0.118624	0.409101	0.0134817	0.0876206
Tmem42	0	3.21202	2.25717	2.43834	2.1028	3.47396	3.8051	3.27791	3.49273	3.5496	2.86353	0.0135065	0.0877343
1190002F15Rik	2.4608	2.69038	3.9626	3.71097	3.56325	3.99759	0	0	1.8931	0	0.233345	0.0136299	0.0884888
Prr5	2.32895	1.976	0.238294	1.03277	1.30895	2.09695	2.18933	2.77632	3.40218	3.20475	2.56137	0.0136562	0.0886026
Ubfd1	4.07933	4.60084	4.33616	4.64196	3.3265	3.62286	2.51299	2.75094	3.31593	3.05443	0.452025	0.013662	0.0886026
Lactb	0	0.169316	3.06565	0	0	4.57047	5.48069	4.23114	0	2.48004	6.52272	0.0136702	0.0886084
Trim47	1.38409	0.169316	3.27148	3.72766	1.65716	0	1.22772	0	0	0	0.287893	0.0136896	0.088687
Ppdpf	2.83717	3.01874	4.27552	4.72555	4.66755	4.65679	5.75974	5.12128	5.61411	5.16365	2.56366	0.0137266	0.0888797
Metrnl	1.83746	0.169316	2.28407	2.66696	2.80638	0	0	0.251786	0	1.65419	0.336425	0.0137592	0.0890271
Fgfr3	5.179	5.22311	3.03212	5.31072	0	1.61516	0	0	3.02648	0.0299435	0.142134	0.0137688	0.0890271
Stard8	1.03502	0.169316	1.47548	1.22253	2.16181	0	0	0.149303	0	0.0983579	0.446491	0.0137714	0.0890271
Ebp	4.76993	2.60663	3.50459	4.58934	3.39373	4.6406	4.79631	5.94473	4.88816	5.56256	2.62739	0.0137832	0.0890564
Kctd15	0	0.169316	2.8863	0	3.17283	3.16672	2.11487	3.66464	4.80959	3.00417	4.30587	0.0138076	0.0891232
Pbk	2.19402	3.14595	0.330881	0	2.94582	0	0	0	0	0	0.302848	0.0138082	0.0891232
Slc29a3	3.43216	2.15371	2.17079	3.61317	2.46381	4.93082	3.48566	4.25066	4.30404	3.41219	2.47932	0.0138261	0.0891911
Gdpd5	1.97541	2.3335	2.9044	0.630749	0.635242	2.8863	2.8818	3.31156	2.98418	3.34256	2.61248	0.0138569	0.0893422
Pfdn4	4.56171	4.74295	4.22575	5.88353	4.61919	2.17596	3.77307	2.87963	4.48687	3.64754	0.375267	0.0139026	0.0895899
Clca3a2	0	0.169316	3.74387	2.66305	4.09549	0	0	0	0	0	0.227771	0.0139651	0.0899446
Apoe	5.53246	4.5218	1.83638	6.59387	6.49843	0.834191	1.64581	4.04856	2.27338	3.58364	0.174407	0.0140027	0.090139
Hbs1l	4.14966	2.79187	2.77632	3.86067	3.41978	1.51876	1.82449	3.01791	2.16908	2.30839	0.425747	0.0140262	0.0902001
Adat2	2.40174	0.169316	2.58372	0	3.47344	4.08236	4.0675	3.17412	2.937	3.67254	3.63275	0.014027	0.0902001
Tpm1	5.02635	4.53693	5.58206	5.31561	6.14485	6.11294	6.31974	7.14188	6.12442	6.78386	2.25856	0.0140434	0.0902579
Gemin5	2.14103	3.50512	0.799977	4.80582	2.33482	0	0.940178	0	1.42792	1.64924	0.265377	0.0140701	0.090339
Gabpb2	3.94554	3.61961	2.86087	2.47361	2.65383	1.07032	2.66917	2.32343	0.606082	1.89763	0.379623	0.0140709	0.090339
Hacd4	1.29337	0.169316	1.53002	1.81926	1.40759	0	0	0.391824	0	0.24374	0.461116	0.0141259	0.0906442
Hnrnpa1	4.2819	4.78184	4.85494	4.04815	4.68228	3.28918	4.05084	3.3771	3.26717	3.55518	0.492458	0.0141593	0.090746
Atg101	1.71323	1.82736	1.84321	1.0417	2.21526	2.21593	2.55365	3.18386	3.02893	3.05352	2.11261	0.0141774	0.090746
Abr	2.26964	3.01367	1.21627	2.54011	1.79589	3.85415	3.58609	3.31085	3.79315	2.54764	2.38049	0.0141847	0.090746
Top2a	4.41594	4.24021	1.69319	0	2.25286	1.09682	0	0	0.93081	0	0.230859	0.0141928	0.090746
Ing1	2.16475	3.34606	2.76575	3.47015	0.296829	5.13239	3.95337	3.37547	4.92685	3.46668	3.39225	0.014193	0.090746
Ndufa13	9.22253	9.79261	8.58671	8.8508	8.78592	11.851	11.1034	9.6277	10.1675	9.56724	2.66779	0.0142017	0.090746
Hsd17b12	4.14085	3.72466	3.32562	4.22575	4.80208	6.02205	5.3647	5.51009	4.14127	5.51086	2.40494	0.0142058	0.090746
Krt23	5.90297	2.50818	4.03116	6.19283	4.52904	5.71903	6.46036	6.82831	6.77025	6.33348	3.45684	0.0142075	0.090746
Pde4d	2.18078	1.63533	0.982415	1.75629	0.764045	3.04602	3.39404	1.6436	3.23444	2.43555	2.44013	0.0142089	0.090746
Gm4265	0	0.169316	0	0	0	0	1.62033	2.32436	1.78352	0.830609	2.42486	0.0142243	0.0907966
Fam53c	2.33595	3.36259	4.23866	3.09491	2.83043	4.30404	4.62579	4.55777	4.80208	3.68377	2.33299	0.0142632	0.0909969
Cap1	5.85988	3.69466	4.23577	4.66978	5.27078	5.8984	5.97516	5.77272	6.2433	6.07432	2.37282	0.0143408	0.0914437
Trip12	3.02838	1.97857	3.08266	2.88804	2.57994	4.45096	3.99186	3.23398	4.19659	3.36596	2.19825	0.0143482	0.0914437
Rps4x	8.40052	8.23087	7.83415	8.33163	8.15894	7.5728	7.58642	6.78532	7.23026	6.67487	0.492675	0.0143906	0.0916298
Il1r1	3.94766	3.423	0.0306895	0	4.58627	0	0	0	0	0.159575	0.194035	0.0144021	0.0916298
Twf1	5.40757	3.43361	6.13041	5.6305	5.68608	6.07432	6.944	7.08155	6.35789	7.08979	2.73563	0.0144054	0.0916298
Tmem243	0	0.169316	1.71797	0.593102	0.142486	3.28293	1.88245	1.86263	3.1259	0.47466	3.03382	0.0144076	0.0916298
Stat6	1.34082	2.2865	3.24804	3.78386	3.50512	4.54442	3.21248	4.36651	4.90716	4.57424	2.80518	0.0144306	0.0917283
0610009L18Rik	3.00849	0.169316	2.60824	0	3.08955	4.4917	3.21596	3.38515	3.89544	3.20008	3.63649	0.0144472	0.0917859
Riok2	0.680962	1.56647	2.09584	0.54187	0	2.63501	4.12548	2.25482	2.12585	1.53294	2.94403	0.0144561	0.0917941
Comt	5.17519	4.93265	4.34717	4.58992	5.21113	3.15184	4.51746	3.92802	3.11067	3.86568	0.45487	0.0144788	0.0918906
Rpsa	5.56888	6.03519	4.87002	5.35668	4.51011	4.81716	4.37801	3.40334	4.21009	3.147	0.412637	0.0145051	0.0920096
Scgn	6.9754	3.83408	4.15043	0	5.49366	4.1133	0	0	0	0	0.103805	0.0145314	0.0921283
Anxa2	6.3427	3.25165	6.35304	6.17789	6.76375	7.31951	7.72172	7.52444	6.93864	7.96534	3.28552	0.0145414	0.0921435
Plscr1	3.15741	2.68364	4.32444	2.51547	3.29738	3.67157	4.36651	4.74809	5.37005	4.30451	2.45629	0.0145495	0.0921468
Ints4	2.71686	3.35653	2.39824	1.52015	3.02724	3.91036	3.40434	4.47372	3.51684	3.76268	2.31303	0.0145651	0.0921545
Cdc42ep2	0	2.40565	4.06491	1.92549	0.63811	0	0	0	0	0	0.285818	0.0145659	0.0921545
Naa50	5.88892	3.65512	5.37442	4.5779	4.27844	4.14767	2.24732	3.78426	3.10398	3.27509	0.367726	0.0145892	0.092254
Nudt8	2.74481	2.81939	3.22426	3.40112	3.18575	3.51426	3.9838	4.09312	4.42927	4.4201	2.01816	0.0146215	0.0923364
Agfg2	0.446781	0.169316	0.158994	0.796276	0	1.36136	1.3421	1.79404	1.77092	0.614732	2.08834	0.0146289	0.0923364
Bcat2	5.181	5.46781	5.95568	4.40415	6.48688	3.63297	4.76724	4.76608	3.65563	4.11415	0.402793	0.0146326	0.0923364
Fbxw4	1.67545	0.169316	0.090865	0	1.08571	2.37745	2.18495	1.79837	1.24593	1.62033	2.36385	0.0146426	0.0923364
Iapp	9.88733	3.06389	5.31072	0	1.83506	0	0.761722	0	0	0	0.0685332	0.0146432	0.0923364
Rmnd5a	7.20787	7.05782	6.90703	8.18565	6.85634	9.07898	8.16314	7.97349	8.3824	8.25624	2.18542	0.0146599	0.0923364
Rpl14	7.87724	8.28928	7.71792	7.81703	7.5996	7.27696	6.76375	6.55265	7.17587	6.55011	0.501268	0.0146613	0.0923364
Prps1	4.9339	4.93209	2.82541	2.93883	4.41687	1.48077	2.22765	2.98837	1.7192	3.55274	0.326312	0.0146663	0.0923364
Abhd5	3.61286	1.90101	0.697467	1.93663	3.41993	2.93479	4.86395	4.60687	4.1331	3.45975	3.21787	0.0146706	0.0923364
Surf4	6.13225	6.69623	6.91714	6.01082	6.89679	4.68776	5.43093	5.99443	5.08437	5.82784	0.458318	0.0146852	0.092381
Tmem59	8.19307	8.24265	9.58711	9.06786	9.34872	8.72836	10.2046	12.2213	10.2415	12.3162	3.61629	0.0147652	0.0928359
Metrn	0.861682	0.169316	1.63935	1.02001	2.1328	0	0	0	0	0	0.446079	0.0147729	0.0928363
Pkn1	0.557591	0.169316	2.58874	3.48847	0.794182	2.69038	3.72665	3.37646	4.09061	2.65383	3.45318	0.0147882	0.0928541
Rps23	8.35412	8.40052	7.9509	8.41196	7.97895	7.92456	6.92412	6.55441	7.60729	6.46207	0.458566	0.014791	0.0928541
Casd1	2.21593	0.169316	2.95476	3.52488	3.41248	4.15818	4.19684	3.68534	4.69933	3.8778	3.1778	0.0148036	0.092885
Cxxc4	1.74455	3.18749	3.52756	1.49534	3.18386	3.07783	0.888407	0	0	0	0.280386	0.0148308	0.0929256
Mex3a	2.37241	1.60482	1.49815	1.00521	1.85436	0.644584	1.10065	0.235934	0.750093	0.12107	0.467642	0.0148353	0.0929256
Rps20	9.12543	9.37962	9.10466	9.47879	8.90025	8.87988	8.00367	7.20004	8.59881	7.51419	0.448	0.0148379	0.0929256
Sik1	0.559302	1.83029	1.14964	1.87344	0.798529	2.82995	3.01874	2.35599	2.71719	1.45343	2.35026	0.0148406	0.0929256
Rpl4	8.64077	8.49276	9.41691	9.02217	9.41691	7.64656	7.73452	8.14098	8.15894	8.18565	0.491555	0.0148665	0.0930398
Vim	5.30348	0.169316	3.07511	3.60004	5.60108	0	0	0.685941	0	3.40383	0.150533	0.0148782	0.0930655
Dclre1c	0	0.169316	0.387334	0.646509	0.410915	1.34313	2.09695	2.05952	2.38804	0.146608	2.43519	0.014914	0.0932414
Pxmp4	1.89544	0.169316	4.86937	4.36226	4.86033	4.4048	5.77472	5.86337	6.23674	5.64979	5.11431	0.0149382	0.0933445
Senp8	0	0.169316	0.323769	1.29624	0.0532805	1.13381	1.72228	2.4051	1.10176	1.31926	2.24688	0.0149633	0.0934535
Trappc2	1.44158	0.169316	2.82026	0	3.03316	1.16991	3.82203	4.70752	4.12346	4.53367	4.52668	0.0149959	0.0935867
Rpl14-ps1	8.30776	8.56576	8.14758	8.10565	8.09118	7.62287	7.14188	7.03401	7.5728	7.03711	0.513397	0.015	0.0935867
Sh3yl1	0.749536	0.169316	1.45286	2.16181	2.70283	1.95962	3.44479	3.48487	2.45945	3.45539	2.85512	0.015094	0.0941247
Abcb10	2.70699	1.67239	1.253	1.26874	0	3.65832	3.37845	3.10808	3.20089	1.40373	2.96838	0.0151197	0.0941956
Antxr2	0	2.80478	0	1.15088	0.459043	2.79103	2.3911	2.53589	1.6028	2.74319	2.88758	0.0151209	0.0941956
Ndufs8	5.71903	5.71784	6.34736	6.86428	6.27082	7.17587	7.74335	7.11842	7.15331	6.98511	2.07246	0.0152027	0.0946566
Lpcat4	1.42792	1.5702	1.80534	0.443041	2.48362	2.90277	1.65109	3.79758	2.81326	3.68653	2.68369	0.0152194	0.0947121
Hnrnpa3	5.07866	5.57236	4.31126	4.23866	3.56733	3.74789	3.46417	2.74174	3.23612	3.42211	0.425949	0.015235	0.0947608
Srgap2	3.63524	4.21835	0.343816	5.20391	4.14484	0	2.08095	1.37113	0	2.50004	0.200433	0.0152491	0.0948004
Rab10os	1.53716	0.169316	0.0415528	0	0.386636	1.2832	1.63776	1.55834	1.38293	1.81217	2.15539	0.0153526	0.0953945
Ggact	3.25976	4.77406	4.63758	3.93566	4.89821	4.91837	5.56755	5.97332	5.47295	5.46181	2.26223	0.0153648	0.0954221
Inafm2	2.67634	5.50383	4.8279	4.10841	2.40907	5.7478	6.37266	5.41414	5.32521	4.98512	3.16866	0.0154095	0.0956508
Frmd4a	1.82685	2.10205	1.44097	2.47955	0.223444	0.705601	0	0.139126	0.797887	0	0.410072	0.0154259	0.0957036
Decr1	3.52024	2.60768	3.5092	4.88963	4.42313	5.10344	5.44412	4.80463	5.83825	4.48874	2.54182	0.0154481	0.0957921
Gm15915	4.28862	4.92289	4.22087	3.64429	5.11064	0	4.50334	3.03065	2.78683	2.30926	0.265826	0.0154698	0.0958782
Bad	2.70076	4.08137	2.54319	3.94096	3.24996	4.04211	4.03777	4.73927	5.0291	4.68045	2.30137	0.0155187	0.0960936
Ibtk	5.21529	5.70824	5.05134	5.32169	4.58055	4.99287	3.89788	3.56221	3.88275	3.98542	0.46291	0.0155204	0.0960936
Lats1	4.62935	4.60687	5.64822	4.01326	4.0248	6.51354	5.69725	5.68521	5.8909	5.14387	2.30003	0.0155472	0.0962107
Cdk17	3.2396	2.73794	3.60563	3.99992	2.52999	2.92409	2.30636	1.29903	2.05356	0.940794	0.401132	0.0155685	0.0962938
Slc7a5	5.2951	5.96547	4.45096	3.90985	2.73388	3.40054	2.7374	2.46768	2.33155	3.46246	0.331913	0.015582	0.096328
Jmy	1.6017	4.0127	2.06095	2.09613	2.96893	4.85099	3.68982	3.9626	3.49368	3.69243	2.62047	0.0155937	0.0963516
Gimap3	0	0.169316	0.329378	0	1.764	0	1.99503	2.83966	3.02462	2.76184	3.18588	0.0156703	0.0967269
Ino80dos	0	0.169316	0.734688	0	0.828185	0	2.4026	2.80638	2.43428	1.43924	2.77034	0.0156766	0.0967269
Snord17	4.50334	3.17326	0	4.73146	2.45931	1.31279	1.43803	0	1.23405	0	0.221212	0.0156783	0.0967269
Ankrd42	1.00085	0.169316	1.99305	0.734688	2.43428	0	0	0	0	0	0.415685	0.0157265	0.0969747
Klc4	3.79105	3.28726	3.76488	4.25276	3.22554	4.25578	4.54994	5.24526	4.53476	4.9915	2.07218	0.0157519	0.097051
Fzd9	2.91222	1.60785	1.62305	2.22943	0	0.520742	0.764045	0	0	0	0.374347	0.0157592	0.097051
Meg3	3.87432	4.56917	0.742394	2.385	0.904548	0.88022	1.50581	0	0	0.0842526	0.249822	0.0157698	0.097051
Cdipt	3.40112	4.89332	4.71719	3.6317	4.88179	4.87484	5.09066	6.18041	5.77338	5.88627	2.38847	0.0157739	0.097051
Tma16	1.78149	0.169316	1.88609	2.61859	0.829171	0	0	0	0	0.678749	0.400206	0.0157826	0.097051
Snx24	0	1.76127	2.3335	0.466897	2.28619	0	0	0	0	0	0.387007	0.0157867	0.097051
Ldlrap1	2.96342	0.169316	3.08878	3.11219	3.72466	0	2.86026	0	0	0	0.243227	0.0158686	0.0974924
Stxbp3	3.74746	3.1369	3.01634	1.9604	1.94644	3.65624	3.3492	4.75871	4.15458	4.3373	2.44477	0.0158746	0.0974924
Vwa9	0.669201	2.00104	2.19874	0.535695	0.361398	1.99925	3.47527	3.0212	1.5718	2.91273	2.71855	0.0159068	0.0976411
Rpl10	9.08679	8.87988	9.24005	9.10466	9.08679	8.19307	8.3824	8.08484	8.0974	8.12182	0.534503	0.0159256	0.0977072
Eif3j1	5.09859	6.15605	3.60998	4.98882	4.57763	3.66389	3.98412	3.8278	3.42921	2.92886	0.400692	0.0159517	0.0977478
Tmem123	5.23208	6.05578	7.00993	7.4106	6.85191	4.62183	5.53859	5.76719	5.45485	3.13085	0.327735	0.0159556	0.0977478
D8Ertd738e	4.36476	4.31073	4.29883	4.56547	4.14966	5.63487	5.8974	4.73109	5.6378	4.91332	2.03496	0.0159564	0.0977478
Hmgcl	1.38454	0.169316	3.02077	3.43708	3.37315	4.72744	4.24294	4.08878	2.996	4.15818	3.40038	0.0160114	0.0980358
Car7	0	0.169316	0.370649	0	1.48307	0	2.09008	2.03059	4.08836	2.74546	3.44927	0.0160709	0.098341
Foxa2	5.57428	5.92348	4.97732	5.15093	4.1574	4.94802	4.32951	3.68321	2.60334	3.11067	0.373263	0.0160775	0.098341
C2	0	0.169316	3.84348	0	5.79717	3.53052	3.88778	5.55751	6.54748	5.32807	8.04605	0.0160945	0.0983957
Gm14326	0	0.169316	2.50542	0	2.19179	3.15969	3.11762	3.7457	0.854674	3.30839	3.63993	0.0161602	0.0987478
Fam195a	4.38146	4.61462	3.52992	5.32725	3.86108	3.91634	0	3.00958	2.98629	2.73599	0.284553	0.0161779	0.0988063
Clps	15.6516	15.6516	15.6516	15.6516	15.2097	14.4302	13.8338	13.1051	15.2097	9.36597	0.192873	0.0161884	0.0988209
Copb2	7.51419	6.98883	7.5496	7.45447	7.16236	7.11095	6.20573	6.45179	5.13239	6.02561	0.451063	0.0161977	0.0988282
5830428M24Rik	2.63317	0.169316	0.0233154	0	0	3.87722	1.26081	2.84051	1.6453	1.94678	3.36117	0.0162382	0.0990252
Zfp612	2.28003	4.33789	3.1393	3.05204	3.79315	2.09724	1.20907	1.16397	2.95141	2.30584	0.38556	0.0162463	0.0990252
B4galt2	3.55691	3.9677	0.168894	1.21443	1.02095	0	0	0.200808	0	0.466321	0.276941	0.0162845	0.0992079
Fam135a	3.49014	3.38954	3.09491	2.28905	2.99647	1.93776	2.16352	2.10426	2.30813	1.61455	0.490941	0.0162954	0.0992251
Mapk6	2.26908	2.10019	2.49101	2.31231	2.83158	2.48004	3.40267	4.03252	3.73212	3.83527	2.13715	0.0163115	0.0992418
[truncated: 10,162 more rows]
